# Supplementary material for: N-Bordered Rylene Arches via Programmable Curved π-Extension
Source: Research Square preprint supplement (doi:10.21203/rs.3.rs-8245215/v1), 2026-01-09

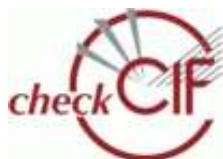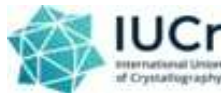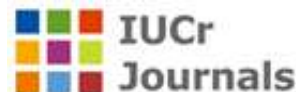

## checkCIF/PLATON report

Structure factors have been supplied for datablock(s) ck-2cf32phn-4nh-qte-new\_auto\_sq

THIS REPORT IS FOR GUIDANCE ONLY. IF USED AS PART OF A REVIEW PROCEDURE FOR PUBLICATION, IT SHOULD NOT REPLACE THE EXPERTISE OF AN EXPERIENCED CRYSTALLOGRAPHIC REFEREE.

No syntax errors found.      CIF dictionary      Interpreting this report

### Datablock: ck-2cf32phn-4nh-qte-new\_auto\_sq

---

|                        |                                              |                                        |
|------------------------|----------------------------------------------|----------------------------------------|
| Bond precision:        | C-C = 0.0064 Å                               | Wavelength=1.54184                     |
| Cell:                  | a=43.8664 (7)<br>alpha=90                    | b=27.2131 (4)<br>beta=90               |
| Temperature:           | 105 K                                        | c=22.9748 (3)<br>gamma=90              |
|                        | Calculated                                   | Reported                               |
| Volume                 | 27426.0 (7)                                  | 27426.0 (7)                            |
| Space group            | F d d 2                                      | F d d 2                                |
| Hall group             | F 2 -2d                                      | F 2 -2d                                |
| Moiety formula         | 2(C76 H50 F12 N6 O8), 3(C H C13) [+ solvent] | C76 H50 F12 N6 O8, 1.5(C H C13), 0.5[] |
| Sum formula            | C155 H103 Cl9 F24 N12 O16 [+ solvent]        | C77.50 H51.50 Cl4.50 F12 N6 O8         |
| Mr                     | 3164.55                                      | 1582.27                                |
| Dx, g cm <sup>-3</sup> | 1.533                                        | 1.533                                  |
| Z                      | 8                                            | 16                                     |
| Mu (mm <sup>-1</sup> ) | 2.598                                        | 2.598                                  |
| F000                   | 12912.0                                      | 12912.0                                |
| F000'                  | 12982.39                                     |                                        |
| h, k, lmax             | 55, 34, 28                                   | 54, 34, 28                             |
| Nref                   | 14389 [ 7380]                                | 10623                                  |
| Tmin, Tmax             | 0.856, 0.878                                 | 0.588, 1.000                           |
| Tmin'                  | 0.459                                        |                                        |

| atom | Z*formula | cif sites | diff |
|------|-----------|-----------|------|
| C    | 1240.00   | 1240.00   | 0.00 |
| H    | 824.00    | 824.00    | 0.00 |
| Cl   | 72.00     | 68.00     | 4.00 |
| F    | 192.00    | 192.00    | 0.00 |
| N    | 96.00     | 96.00     | 0.00 |

|                   |                                                            |        |      |               |
|-------------------|------------------------------------------------------------|--------|------|---------------|
| O                 | 128.00                                                     | 128.00 | 0.00 |               |
| PLAT002_ALERT_2_G | Number of Distance or Angle Restraints on AtSite           |        |      | 11 Note       |
| PLAT003_ALERT_2_G | Number of Uiso or U(i,j) Restrained non-H-Atoms            |        |      | 11 Report     |
| PLAT007_ALERT_5_G | Number of Unrefined Donor-H Atoms .....                    |        |      | 4 Report      |
|                   | H1 H3 H4 H6                                                |        |      |               |
| PLAT041_ALERT_1_G | Calc. and Reported SumFormula Strings Differ               |        |      | Please Check  |
|                   | Calc: C155 H103 Cl9 F24 N12 O16                            |        |      |               |
|                   | Rep.: C77.50 H51.50 Cl4.50 F12 N6 O8                       |        |      |               |
| PLAT042_ALERT_1_G | Calc. and Reported MoietyFormula Strings Differ            |        |      | Please Check  |
|                   | Calc: 2(C76 H50 F12 N6 O8), 3(C H Cl3)                     |        |      |               |
|                   | Rep.: C76 H50 F12 N6 O8, 1.5(C H Cl3), 0.5[]               |        |      |               |
| PLAT045_ALERT_1_G | Calculated and Reported Z Differ by a Factor ...           |        |      | 0.500 Check   |
| PLAT072_ALERT_2_G | SHELXL First Parameter in WGHT Unusually Large             |        |      | 0.13 Report   |
| PLAT083_ALERT_2_G | SHELXL Second Parameter in WGHT Unusually Large            |        |      | 47.96 Why ?   |
| PLAT172_ALERT_4_G | The CIF-Embedded .res File Contains DFIX Records           |        |      | 2 Report      |
| PLAT173_ALERT_4_G | The CIF-Embedded .res File Contains DANG Records           |        |      | 3 Report      |
| PLAT177_ALERT_4_G | The CIF-Embedded .res File Contains DELU Records           |        |      | 1 Report      |
| PLAT178_ALERT_4_G | The CIF-Embedded .res File Contains SIMU Records           |        |      | 2 Report      |
| PLAT188_ALERT_3_G | A Non-default SIMU Restraint Value has been used           |        |      | 0.0100 Report |
| PLAT188_ALERT_3_G | A Non-default SIMU Restraint Value has been used           |        |      | 0.0200 Report |
| PLAT231_ALERT_4_G | Hirshfeld Test (Solvent) Cl4 --C78 .                       |        |      | 9.7 s.u.      |
| PLAT231_ALERT_4_G | Hirshfeld Test (Solvent) Cl6 --C78 .                       |        |      | 10.1 s.u.     |
| PLAT242_ALERT_2_G | Low 'MainMol' Ueq as Compared to Neighbors of              |        |      | C52 Check     |
| PLAT242_ALERT_2_G | Low 'MainMol' Ueq as Compared to Neighbors of              |        |      | C53 Check     |
| PLAT242_ALERT_2_G | Low 'MainMol' Ueq as Compared to Neighbors of              |        |      | C71 Check     |
| PLAT299_ALERT_4_G | Atom Site Occupancy Constrained at .....                   |        |      | 0.5 Check     |
|                   | Cl4 Cl14A Cl15 Cl15A Cl16 Cl16A H78                        |        |      | H78A          |
|                   | Cl1 Cl12 Cl13 C77 H77                                      |        |      |               |
| PLAT302_ALERT_4_G | Anion/Solvent/Minor-Residue Disorder (Resd 2)              |        |      | 75% Note      |
| PLAT302_ALERT_4_G | Anion/Solvent/Minor-Residue Disorder (Resd 3)              |        |      | 100% Note     |
| PLAT304_ALERT_4_G | Non-Integer Number of Atoms in ..... (Resd 3)              |        |      | 2.50 Check    |
| PLAT333_ALERT_2_G | Large Aver C6-Ring C-C Dist C29 -C34 .                     |        |      | 1.42 Ang.     |
| PLAT432_ALERT_2_G | Short Inter X...Y Contact Cl4A ..C78 .                     |        |      | 2.10 Ang.     |
|                   | 1-x,1-y,z =                                                |        |      | 2_665 Check   |
| PLAT432_ALERT_2_G | Short Inter X...Y Contact Cl5 ..C78 .                      |        |      | 3.07 Ang.     |
|                   | 1-x,1-y,z =                                                |        |      | 2_665 Check   |
| PLAT432_ALERT_2_G | Short Inter X...Y Contact Cl5 ..C1 .                       |        |      | 3.07 Ang.     |
|                   | x,y,z =                                                    |        |      | 1_555 Check   |
| PLAT432_ALERT_2_G | Short Inter X...Y Contact Cl5 ..C2 .                       |        |      | 3.23 Ang.     |
|                   | x,y,z =                                                    |        |      | 1_555 Check   |
| PLAT432_ALERT_2_G | Short Inter X...Y Contact C78 ..C78 .                      |        |      | 2.61 Ang.     |
|                   | 1-x,1-y,z =                                                |        |      | 2_665 Check   |
| PLAT605_ALERT_4_G | Largest Solvent Accessible VOID in the Structure           |        |      | 224 A**3      |
| PLAT789_ALERT_4_G | Atoms with Negative _atom_site_disorder_group #            |        |      | 13 Check      |
| PLAT822_ALERT_4_G | CIF-embedded .res Contains Negative PART Numbers           |        |      | 3 Check       |
| PLAT860_ALERT_3_G | Number of Least-Squares Restraints .....                   |        |      | 88 Note       |
| PLAT869_ALERT_4_G | ALERTS Related to the Use of SQUEEZE Suppressed            |        |      | ! Info        |
| PLAT912_ALERT_4_G | Missing # of FCF Reflections Above STh/L= 0.600            |        |      | 280 Note      |
| PLAT915_ALERT_3_G | No Flack x Check Done: Low Friedel Pair Coverage           |        |      | 51 %          |
| PLAT933_ALERT_2_G | Number of HKL-OMIT Records in Embedded .res File           |        |      | 2 Note        |
|                   | 2 0 -2, 4 2 -2,                                            |        |      |               |
| PLAT941_ALERT_3_G | Average HKL Measurement Multiplicity .....                 |        |      | 3.5 Low       |
| PLAT969_ALERT_5_G | The 'Henn et al.' R-Factor-gap value .....                 |        |      | 5.163 Note    |
|                   | Predicted wR2: Based on SigI**2 3.39 or SHELX Weight 16.79 |        |      |               |
| PLAT978_ALERT_2_G | Number C-C Bonds with Positive Residual Density.           |        |      | 1 Info        |

0 **ALERT level A** = Most likely a serious problem - resolve or explain  
 0 **ALERT level B** = A potentially serious problem, consider carefully  
 10 **ALERT level C** = Check. Ensure it is not caused by an omission or oversight  
 43 **ALERT level G** = General information/check it is not something unexpected  
  
 6 ALERT type 1 CIF construction/syntax error, inconsistent or missing data  
 20 ALERT type 2 Indicator that the structure model may be wrong or deficient  
 9 ALERT type 3 Indicator that the structure quality may be low  
 16 ALERT type 4 Improvement, methodology, query or suggestion  
 2 ALERT type 5 Informative message, check

---

## Validation response form

Please find below a validation response form (VRF) that can be filled in and pasted into your CIF.

```

# start Validation Reply Form
_vrf_PLAT089_ck-2cf32phn-4nh-qte-new_auto_sq
;
PROBLEM: Poor Data / Parameter Ratio (Zmax <= 18) ..... 6.91 Note
RESPONSE: ...
;
_vrf_PLAT234_ck-2cf32phn-4nh-qte-new_auto_sq
;
PROBLEM: Large Hirshfeld Difference C15A --C78 . 0.22 Ang.
RESPONSE: ...
;
_vrf_PLAT260_ck-2cf32phn-4nh-qte-new_auto_sq
;
PROBLEM: Large Average Ueq of Residue Including C14 0.272 Check
RESPONSE: ...
;
_vrf_PLAT340_ck-2cf32phn-4nh-qte-new_auto_sq
;
PROBLEM: Low Bond Precision on C-C Bonds ..... 0.00643 Ang.
RESPONSE: ...
;
_vrf_PLAT415_ck-2cf32phn-4nh-qte-new_auto_sq
;
PROBLEM: Short Inter D-H..H-X H3 ..H42A . 2.12 Ang.
RESPONSE: ...
;
_vrf_PLAT420_ck-2cf32phn-4nh-qte-new_auto_sq
;
PROBLEM: D-H Bond Without Acceptor N4 --H4 . Please Check
RESPONSE: ...
;
_vrf_PLAT911_ck-2cf32phn-4nh-qte-new_auto_sq
;
PROBLEM: Missing FCF Refl Between Thmin & STh/L= 0.600 53 Report
RESPONSE: ...
;
_vrf_PLAT918_ck-2cf32phn-4nh-qte-new_auto_sq
;
PROBLEM: Reflection(s) with I(obs) much Smaller I(calc) . 3 Check
RESPONSE: ...

```

```
;
_vrf_PLAT987_ck-2cf32phn-4nh-qte-new_auto_sq
;
PROBLEM: The Flack x is >> 0 - Do a BASF/TWIN Refinement      Please Check
RESPONSE: ...
;
# end Validation Reply Form
```

---

It is advisable to attempt to resolve as many as possible of the alerts in all categories. Often the minor alerts point to easily fixed oversights, errors and omissions in your CIF or refinement strategy, so attention to these fine details can be worthwhile. It is up to the individual to critically assess their own results and, if necessary, seek expert advice.

---

**PLATON version of 26/09/2025; check.def file version of 20/09/2025**

---

## **duplicate check**

**No duplication found**

---

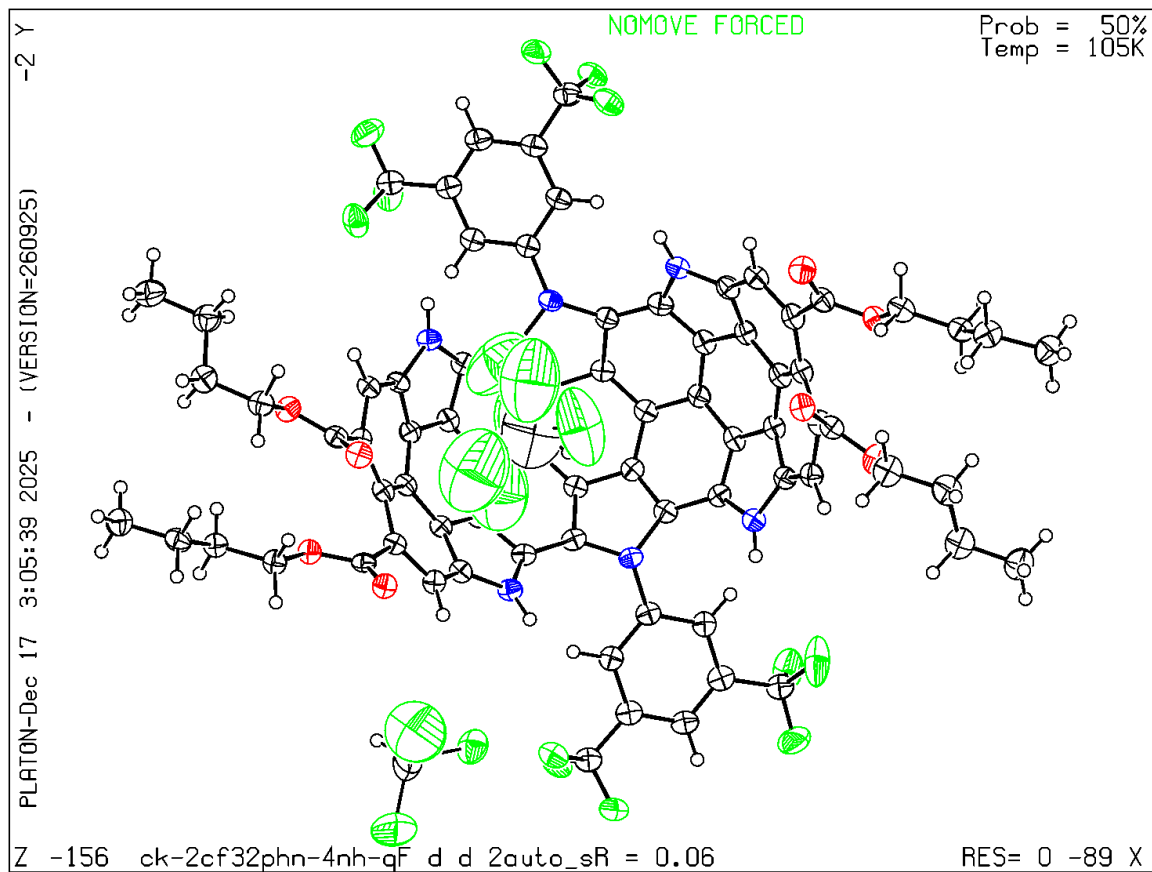

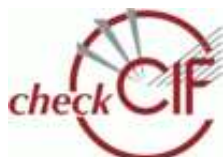

## checkCIF/PLATON report

Structure factors have been supplied for datablock(s) ck-6n-qdi-c60-new\_auto

THIS REPORT IS FOR GUIDANCE ONLY. IF USED AS PART OF A REVIEW PROCEDURE FOR PUBLICATION, IT SHOULD NOT REPLACE THE EXPERTISE OF AN EXPERIENCED CRYSTALLOGRAPHIC REFEREE.

No syntax errors found.      CIF dictionary      Interpreting this report

### Datablock: ck-6n-qdi-c60-new\_auto

---

Bond precision:    C-C = 0.0109 Å

Wavelength=1.54184

Cell:                    a=13.5694 (1)                    b=15.6078 (1)                    c=24.9813 (2)  
                          alpha=102.650 (1)                    beta=92.214 (1)                    gamma=100.521 (1)  
Temperature:        100 K

|                        | Calculated                                                                                                                                                                                                                                 | Reported                                                                                                                              |
|------------------------|--------------------------------------------------------------------------------------------------------------------------------------------------------------------------------------------------------------------------------------------|---------------------------------------------------------------------------------------------------------------------------------------|
| Volume                 | 5058.46 (7)                                                                                                                                                                                                                                | 5058.46 (7)                                                                                                                           |
| Space group            | P -1                                                                                                                                                                                                                                       | P -1                                                                                                                                  |
| Hall group             | -P 1                                                                                                                                                                                                                                       | -P 1                                                                                                                                  |
| Moiety formula         | C <sub>92</sub> H <sub>64</sub> F <sub>12</sub> N <sub>8</sub> O <sub>4</sub> , C <sub>60</sub> , 2 (C <sub>92</sub> H <sub>64</sub> F <sub>12</sub> N <sub>8</sub> O <sub>4</sub> , 2 (C <sub>92</sub> H <sub>4</sub> O), C <sub>60</sub> | C <sub>92</sub> H <sub>64</sub> F <sub>12</sub> N <sub>8</sub> O <sub>4</sub> , 2 (C <sub>92</sub> H <sub>4</sub> O), C <sub>60</sub> |
| Sum formula            | C <sub>154</sub> H <sub>72</sub> F <sub>12</sub> N <sub>8</sub> O <sub>6</sub>                                                                                                                                                             | C <sub>154</sub> H <sub>72</sub> F <sub>12</sub> N <sub>8</sub> O <sub>6</sub>                                                        |
| Mr                     | 2358.20                                                                                                                                                                                                                                    | 2358.19                                                                                                                               |
| Dx, g cm <sup>-3</sup> | 1.548                                                                                                                                                                                                                                      | 1.548                                                                                                                                 |
| Z                      | 2                                                                                                                                                                                                                                          | 2                                                                                                                                     |
| Mu (mm <sup>-1</sup> ) | 0.912                                                                                                                                                                                                                                      | 0.912                                                                                                                                 |
| F000                   | 2416.0                                                                                                                                                                                                                                     | 2416.0                                                                                                                                |
| F000'                  | 2424.05                                                                                                                                                                                                                                    |                                                                                                                                       |
| h, k, lmax             | 17, 19, 31                                                                                                                                                                                                                                 | 16, 19, 30                                                                                                                            |
| Nref                   | 21285                                                                                                                                                                                                                                      | 20310                                                                                                                                 |
| Tmin, Tmax             | 0.896, 0.930                                                                                                                                                                                                                               | 0.684, 1.000                                                                                                                          |
| Tmin'                  | 0.796                                                                                                                                                                                                                                      |                                                                                                                                       |

Correction method= # Reported T Limits: Tmin=0.684 Tmax=1.000  
AbsCorr = MULTI-SCAN

Data completeness= 0.954

Theta(max)= 76.489

R(reflections)= 0.1187( 17137)

wR2(reflections)=  
0.2463( 20310)

S = 1.008

Npar= 1680

---

The following ALERTS were generated. Each ALERT has the format

**test-name\_ALERT\_alert-type\_alert-level.**

Click on the hyperlinks for more details of the test.

---

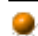

#### **Alert level B**

DIFMN02\_ALERT\_2\_B The minimum difference density is < -0.1\*ZMAX\*1.00  
\_refine\_diff\_density\_min given = -0.979  
Test value = -0.900

**Author Response: The crystal exhibits a little twinning.**

PLAT097\_ALERT\_2\_B Large Reported Max. (Positive) Residual Density 1.79 eA-3

**Author Response: The crystal exhibits a little twinning.**

PLAT098\_ALERT\_2\_B Large Reported Min. (Negative) Residual Density -0.98 eA-3

**Author Response: The crystal exhibits a little twinning.**

PLAT230\_ALERT\_2\_B Hirshfeld Test Diff for C4A --C5A . 7.4 s.u.

**Author Response: The crystal exhibits a little twinning.**

PLAT230\_ALERT\_2\_B Hirshfeld Test Diff for C7A --C8A . 7.6 s.u.

**Author Response: The crystal exhibits a little twinning.**

PLAT230\_ALERT\_2\_B Hirshfeld Test Diff for C25A --C60A . 7.6 s.u.

**Author Response: The crystal exhibits a little twinning.**

PLAT230\_ALERT\_2\_B Hirshfeld Test Diff for C43A --C56A . 8.0 s.u.

**Author Response: The crystal exhibits a little twinning.**



PLAT230\_ALERT\_2\_B Hirshfeld Test Diff for C56A --C57A . 8.1 s.u.

**Author Response: The crystal exhibits a little twinning.**

PLAT340\_ALERT\_3\_B Low Bond Precision on C-C Bonds ..... 0.01093 Ang.

**Author Response: The crystal exhibits a little twinning.**

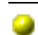

**Alert level C**

DIFMN03\_ALERT\_1\_C The minimum difference density is  $< -0.1 \times Z_{\text{MAX}} \times 0.75$   
The relevant atom site should be identified.

DIFMX02\_ALERT\_1\_C The maximum difference density is  $> 0.1 \times Z_{\text{MAX}} \times 0.75$   
The relevant atom site should be identified.

PLAT042\_ALERT\_1\_C Calc. and Reported MoietyFormula Strings Differ Please Check  
Calc.: C92 H64 F12 N8 O4, C60, 2(C H4 O)  
Rep.: C92 H64 F12 N8 O4, 2(C H4 O), C60

|                                                                 |             |
|-----------------------------------------------------------------|-------------|
| PLAT082_ALERT_2_C High R1 Value .....                           | 0.12 Report |
| PLAT213_ALERT_2_C Atom C78A has ADP max/min Ratio .....         | 3.1 prolat  |
| PLAT214_ALERT_2_C Atom C8A (Anion/Solvent) ADP max/min Ratio    | 4.6 prolat  |
| PLAT214_ALERT_2_C Atom C12A (Anion/Solvent) ADP max/min Ratio   | 4.2 prolat  |
| PLAT214_ALERT_2_C Atom C23A (Anion/Solvent) ADP max/min Ratio   | 4.8 prolat  |
| PLAT214_ALERT_2_C Atom C28A (Anion/Solvent) ADP max/min Ratio   | 4.5 oblate  |
| PLAT214_ALERT_2_C Atom C32A (Anion/Solvent) ADP max/min Ratio   | 5.0 prolat  |
| PLAT214_ALERT_2_C Atom C40A (Anion/Solvent) ADP max/min Ratio   | 4.1 prolat  |
| PLAT214_ALERT_2_C Atom C50A (Anion/Solvent) ADP max/min Ratio   | 4.9 prolat  |
| PLAT214_ALERT_2_C Atom C51A (Anion/Solvent) ADP max/min Ratio   | 4.6 oblate  |
| PLAT214_ALERT_2_C Atom C58A (Anion/Solvent) ADP max/min Ratio   | 4.5 prolat  |
| PLAT220_ALERT_2_C NonSolvent Resd 1 C Ueq(max)/Ueq(min) Range   | 4.4 Ratio   |
| PLAT222_ALERT_3_C NonSolvent Resd 1 H Uiso(max)/Uiso(min) Range | 4.9 Ratio   |
| PLAT230_ALERT_2_C Hirshfeld Test Diff for C21 --C28 .           | 6.3 s.u.    |

**Author Response: The crystal exhibits a little twinning.**

PLAT230\_ALERT\_2\_C Hirshfeld Test Diff for C22 --C23 . 6.0 s.u.

**Author Response: The crystal exhibits a little twinning.**

PLAT230\_ALERT\_2\_C Hirshfeld Test Diff for C22 --C27 . 6.1 s.u.

**Author Response: The crystal exhibits a little twinning.**

PLAT230\_ALERT\_2\_C Hirshfeld Test Diff for C2A --C59A . 6.9 s.u.

**Author Response: The crystal exhibits a little twinning.**

PLAT230\_ALERT\_2\_C Hirshfeld Test Diff for C3A --C36A . 5.9 s.u.

**Author Response: The crystal exhibits a little twinning.**

PLAT230\_ALERT\_2\_C Hirshfeld Test Diff for C8A --C9A . 6.0 s.u.

**Author Response: The crystal exhibits a little twinning.**

PLAT230\_ALERT\_2\_C Hirshfeld Test Diff for C8A --C52A . 6.7 s.u.

**Author Response: The crystal exhibits a little twinning.**

PLAT230\_ALERT\_2\_C Hirshfeld Test Diff for C17A --C22A . 6.9 s.u.

**Author Response: The crystal exhibits a little twinning.**

PLAT230\_ALERT\_2\_C Hirshfeld Test Diff for C19A --C20A . 6.6 s.u.

**Author Response: The crystal exhibits a little twinning.**

PLAT230\_ALERT\_2\_C Hirshfeld Test Diff for C27A --C32A . 6.4 s.u.

**Author Response: The crystal exhibits a little twinning.**

PLAT230\_ALERT\_2\_C Hirshfeld Test Diff for C31A --C32A . 6.6 s.u.

**Author Response: The crystal exhibits a little twinning.**

PLAT230\_ALERT\_2\_C Hirshfeld Test Diff for C35A --C36A . 5.5 s.u.

**Author Response: The crystal exhibits a little twinning.**

PLAT230\_ALERT\_2\_C Hirshfeld Test Diff for C37A --C48A . 6.2 s.u.

**Author Response: The crystal exhibits a little twinning.**

PLAT230\_ALERT\_2\_C Hirshfeld Test Diff for C43A --C44A . 6.8 s.u.

**Author Response: The crystal exhibits a little twinning.**

PLAT230\_ALERT\_2\_C Hirshfeld Test Diff for C48A --C49A . 6.6 s.u.

**Author Response: The crystal exhibits a little twinning.**

|                   |       |           |                                 |      |        |   |            |
|-------------------|-------|-----------|---------------------------------|------|--------|---|------------|
| PLAT234_ALERT_4_C | Large | Hirshfeld | Difference                      | C77  | --C78A | . | 0.22 Ang.  |
| PLAT234_ALERT_4_C | Large | Hirshfeld | Difference                      | C1A  | --C6A  | . | 0.18 Ang.  |
| PLAT234_ALERT_4_C | Large | Hirshfeld | Difference                      | C1A  | --C13A | . | 0.19 Ang.  |
| PLAT234_ALERT_4_C | Large | Hirshfeld | Difference                      | C2A  | --C3A  | . | 0.17 Ang.  |
| PLAT234_ALERT_4_C | Large | Hirshfeld | Difference                      | C5A  | --C51A | . | 0.21 Ang.  |
| PLAT234_ALERT_4_C | Large | Hirshfeld | Difference                      | C6A  | --C7A  | . | 0.18 Ang.  |
| PLAT234_ALERT_4_C | Large | Hirshfeld | Difference                      | C9A  | --C10A | . | 0.18 Ang.  |
| PLAT234_ALERT_4_C | Large | Hirshfeld | Difference                      | C10A | --C18A | . | 0.19 Ang.  |
| PLAT234_ALERT_4_C | Large | Hirshfeld | Difference                      | C11A | --C12A | . | 0.18 Ang.  |
| PLAT234_ALERT_4_C | Large | Hirshfeld | Difference                      | C12A | --C13A | . | 0.19 Ang.  |
| PLAT234_ALERT_4_C | Large | Hirshfeld | Difference                      | C14A | --C15A | . | 0.19 Ang.  |
| PLAT234_ALERT_4_C | Large | Hirshfeld | Difference                      | C14A | --C60A | . | 0.18 Ang.  |
| PLAT234_ALERT_4_C | Large | Hirshfeld | Difference                      | C15A | --C16A | . | 0.17 Ang.  |
| PLAT234_ALERT_4_C | Large | Hirshfeld | Difference                      | C17A | --C18A | . | 0.16 Ang.  |
| PLAT234_ALERT_4_C | Large | Hirshfeld | Difference                      | C18A | --C19A | . | 0.21 Ang.  |
| PLAT234_ALERT_4_C | Large | Hirshfeld | Difference                      | C19A | --C55A | . | 0.23 Ang.  |
| PLAT234_ALERT_4_C | Large | Hirshfeld | Difference                      | C20A | --C57A | . | 0.19 Ang.  |
| PLAT234_ALERT_4_C | Large | Hirshfeld | Difference                      | C26A | --C27A | . | 0.21 Ang.  |
| PLAT234_ALERT_4_C | Large | Hirshfeld | Difference                      | C27A | --C28A | . | 0.19 Ang.  |
| PLAT234_ALERT_4_C | Large | Hirshfeld | Difference                      | C28A | --C29A | . | 0.16 Ang.  |
| PLAT234_ALERT_4_C | Large | Hirshfeld | Difference                      | C29A | --C30A | . | 0.19 Ang.  |
| PLAT234_ALERT_4_C | Large | Hirshfeld | Difference                      | C30A | --C31A | . | 0.17 Ang.  |
| PLAT234_ALERT_4_C | Large | Hirshfeld | Difference                      | C30A | --C58A | . | 0.18 Ang.  |
| PLAT234_ALERT_4_C | Large | Hirshfeld | Difference                      | C32A | --C33A | . | 0.20 Ang.  |
| PLAT234_ALERT_4_C | Large | Hirshfeld | Difference                      | C33A | --C34A | . | 0.18 Ang.  |
| PLAT234_ALERT_4_C | Large | Hirshfeld | Difference                      | C33A | --C38A | . | 0.17 Ang.  |
| PLAT234_ALERT_4_C | Large | Hirshfeld | Difference                      | C36A | --C37A | . | 0.20 Ang.  |
| PLAT234_ALERT_4_C | Large | Hirshfeld | Difference                      | C37A | --C38A | . | 0.18 Ang.  |
| PLAT234_ALERT_4_C | Large | Hirshfeld | Difference                      | C40A | --C41A | . | 0.19 Ang.  |
| PLAT234_ALERT_4_C | Large | Hirshfeld | Difference                      | C41A | --C42A | . | 0.18 Ang.  |
| PLAT234_ALERT_4_C | Large | Hirshfeld | Difference                      | C41A | --C58A | . | 0.18 Ang.  |
| PLAT234_ALERT_4_C | Large | Hirshfeld | Difference                      | C42A | --C46A | . | 0.18 Ang.  |
| PLAT234_ALERT_4_C | Large | Hirshfeld | Difference                      | C50A | --C51A | . | 0.21 Ang.  |
| PLAT234_ALERT_4_C | Large | Hirshfeld | Difference                      | C51A | --C52A | . | 0.17 Ang.  |
| PLAT234_ALERT_4_C | Large | Hirshfeld | Difference                      | C52A | --C53A | . | 0.21 Ang.  |
| PLAT234_ALERT_4_C | Large | Hirshfeld | Difference                      | C57A | --C58A | . | 0.16 Ang.  |
| PLAT234_ALERT_4_C | Large | Hirshfeld | Difference                      | C59A | --C60A | . | 0.18 Ang.  |
| PLAT241_ALERT_2_C | High  | 'MainMol' | Ueq as Compared to Neighbors of |      |        |   | C13A Check |
| PLAT241_ALERT_2_C | High  | 'MainMol' | Ueq as Compared to Neighbors of |      |        |   | C14A Check |
| PLAT241_ALERT_2_C | High  | 'MainMol' | Ueq as Compared to Neighbors of |      |        |   | C19A Check |
| PLAT241_ALERT_2_C | High  | 'MainMol' | Ueq as Compared to Neighbors of |      |        |   | C27A Check |
| PLAT241_ALERT_2_C | High  | 'MainMol' | Ueq as Compared to Neighbors of |      |        |   | C28A Check |
| PLAT241_ALERT_2_C | High  | 'MainMol' | Ueq as Compared to Neighbors of |      |        |   | C36A Check |
| PLAT241_ALERT_2_C | High  | 'MainMol' | Ueq as Compared to Neighbors of |      |        |   | C41A Check |
| PLAT241_ALERT_2_C | High  | 'MainMol' | Ueq as Compared to Neighbors of |      |        |   | C51A Check |
| PLAT241_ALERT_2_C | High  | 'MainMol' | Ueq as Compared to Neighbors of |      |        |   | C52A Check |
| PLAT242_ALERT_2_C | Low   | 'MainMol' | Ueq as Compared to Neighbors of |      |        |   | C23 Check  |
| PLAT242_ALERT_2_C | Low   | 'MainMol' | Ueq as Compared to Neighbors of |      |        |   | C4A Check  |
| PLAT242_ALERT_2_C | Low   | 'MainMol' | Ueq as Compared to Neighbors of |      |        |   | C21A Check |
| PLAT242_ALERT_2_C | Low   | 'MainMol' | Ueq as Compared to Neighbors of |      |        |   | C25A Check |
| PLAT242_ALERT_2_C | Low   | 'MainMol' | Ueq as Compared to Neighbors of |      |        |   | C44A Check |
| PLAT242_ALERT_2_C | Low   | 'MainMol' | Ueq as Compared to Neighbors of |      |        |   | C57A Check |

|                   |                                                  |       |         |        |
|-------------------|--------------------------------------------------|-------|---------|--------|
| PLAT260_ALERT_2_C | Large Average Ueq of Residue Including           | C1A   | 0.121   | Check  |
| PLAT601_ALERT_2_C | Unit-Cell Contains Solvent Accessible VOIDS .LE. |       | 41      | Ang**3 |
| PLAT906_ALERT_3_C | Large K Value in the Analysis of Variance .....  |       | 9.132   | Check  |
| PLAT906_ALERT_3_C | Large K Value in the Analysis of Variance .....  |       | 2.247   | Check  |
| PLAT911_ALERT_3_C | Missing FCF Refl Between Thmin & STh/L=          | 0.600 | 33      | Report |
|                   | -3 1 0, 3 -2 1, 0 -1 1, 0 1 1, 0 -1 2,           |       | 1 0 2,  |        |
|                   | 1 1 2, -2 2 2, 1 -1 3, 1 0 3, -3 2 3,            |       | 0 -2 4, |        |
|                   | 2 0 4, -2 1 4, -1 1 4, 0 1 4, 0 -3 5,            |       | 9 9 12, |        |
|                   | 7 10 13, 9 3 20, -2 10 21, 7 4 22, 4 7 22,       |       | 6 4 23, |        |
|                   | 4 6 23, 5 4 24, 3 4 25, 4 4 25, 2 5 25,          |       | 3 3 26, |        |
|                   | ( 3 More Missing: see the .ckf listing file)     |       |         |        |
| PLAT918_ALERT_3_C | Reflection(s) with I(obs) much Smaller I(calc) . |       | 16      | Check  |
|                   | -1 1 1, 1 1 1, -2 2 1, 1 2 1, -5 4 1,            |       | 0 -2 2, |        |
|                   | -2 1 2, 0 -2 3, 1 4 3, -1 2 4, 1 5 4,            |       | -7 3 5, |        |
|                   | 0 -8 6, -2 -1 8, 2 4 8, -6 -1 10,                |       |         |        |
| PLAT939_ALERT_3_C | Large Value of Not (SHELXL) Weight Optimized S . |       | 13.20   | Check  |
| PLAT971_ALERT_2_C | Check Calcd Resid. Dens. 0.94Ang From C42A       |       | 1.82    | eA-3   |
| PLAT971_ALERT_2_C | Check Calcd Resid. Dens. 1.14Ang From C14A       |       | 1.69    | eA-3   |
| PLAT971_ALERT_2_C | Check Calcd Resid. Dens. 1.77Ang From C76A       |       | 1.62    | eA-3   |

## Alert level G

|                   |                                                  |        |        |
|-------------------|--------------------------------------------------|--------|--------|
| PLAT002_ALERT_2_G | Number of Distance or Angle Restraints on AtSite | 72     | Note   |
| PLAT003_ALERT_2_G | Number of Uiso or U(i,j) Restrained non-H-Atoms  | 67     | Report |
| PLAT007_ALERT_5_G | Number of Unrefined Donor-H Atoms .....          | 2      | Report |
|                   | H5A H6A                                          |        |        |
| PLAT083_ALERT_2_G | SHELXL Second Parameter in WGHT Unusually Large  | 32.91  | Why ?  |
| PLAT154_ALERT_1_G | The s.u.'s on the Cell Angles are Equal ..(Note) | 0.001  | Degree |
| PLAT172_ALERT_4_G | The CIF-Embedded .res File Contains DFIX Records | 8      | Report |
| PLAT177_ALERT_4_G | The CIF-Embedded .res File Contains DELU Records | 8      | Report |
| PLAT178_ALERT_4_G | The CIF-Embedded .res File Contains SIMU Records | 2      | Report |
| PLAT186_ALERT_4_G | The CIF-Embedded .res File Contains ISOR Records | 1      | Report |
| PLAT188_ALERT_3_G | A Non-default SIMU Restraint Value has been used | 0.0200 | Report |
| PLAT188_ALERT_3_G | A Non-default SIMU Restraint Value has been used | 0.0100 | Report |
| PLAT242_ALERT_2_G | Low 'MainMol' Ueq as Compared to Neighbors of    | C71    | Check  |
| PLAT242_ALERT_2_G | Low 'MainMol' Ueq as Compared to Neighbors of    | C72    | Check  |
| PLAT242_ALERT_2_G | Low 'MainMol' Ueq as Compared to Neighbors of    | C87    | Check  |
| PLAT242_ALERT_2_G | Low 'MainMol' Ueq as Compared to Neighbors of    | C88    | Check  |
| PLAT301_ALERT_3_G | Main Residue Disorder .....(Resd 1)              | 4%     | Note   |
| PLAT343_ALERT_2_G | Unusual sp? Angle Range in Main Residue for      | C1A    | Check  |
| PLAT343_ALERT_2_G | Unusual sp? Angle Range in Main Residue for      | C3A    | Check  |
| PLAT343_ALERT_2_G | Unusual sp? Angle Range in Main Residue for      | C5A    | Check  |
| PLAT343_ALERT_2_G | Unusual sp? Angle Range in Main Residue for      | C7A    | Check  |
| PLAT343_ALERT_2_G | Unusual sp? Angle Range in Main Residue for      | C8A    | Check  |
| PLAT343_ALERT_2_G | Unusual sp? Angle Range in Main Residue for      | C9A    | Check  |
| PLAT343_ALERT_2_G | Unusual sp? Angle Range in Main Residue for      | C11A   | Check  |
| PLAT343_ALERT_2_G | Unusual sp? Angle Range in Main Residue for      | C12A   | Check  |
| PLAT343_ALERT_2_G | Unusual sp? Angle Range in Main Residue for      | C14A   | Check  |
| PLAT343_ALERT_2_G | Unusual sp? Angle Range in Main Residue for      | C15A   | Check  |
| PLAT343_ALERT_2_G | Unusual sp? Angle Range in Main Residue for      | C16A   | Check  |
| PLAT343_ALERT_2_G | Unusual sp? Angle Range in Main Residue for      | C18A   | Check  |
| PLAT343_ALERT_2_G | Unusual sp? Angle Range in Main Residue for      | C20A   | Check  |
| PLAT343_ALERT_2_G | Unusual sp? Angle Range in Main Residue for      | C21A   | Check  |
| PLAT343_ALERT_2_G | Unusual sp? Angle Range in Main Residue for      | C22A   | Check  |
| PLAT343_ALERT_2_G | Unusual sp? Angle Range in Main Residue for      | C23A   | Check  |
| PLAT343_ALERT_2_G | Unusual sp? Angle Range in Main Residue for      | C24A   | Check  |
| PLAT343_ALERT_2_G | Unusual sp? Angle Range in Main Residue for      | C25A   | Check  |

|                                                                     |                                 |              |
|---------------------------------------------------------------------|---------------------------------|--------------|
| PLAT343_ALERT_2_G Unusual sp?                                       | Angle Range in Main Residue for | C26A Check   |
| PLAT343_ALERT_2_G Unusual sp?                                       | Angle Range in Main Residue for | C28A Check   |
| PLAT343_ALERT_2_G Unusual sp?                                       | Angle Range in Main Residue for | C32A Check   |
| PLAT343_ALERT_2_G Unusual sp?                                       | Angle Range in Main Residue for | C34A Check   |
| PLAT343_ALERT_2_G Unusual sp?                                       | Angle Range in Main Residue for | C35A Check   |
| PLAT343_ALERT_2_G Unusual sp?                                       | Angle Range in Main Residue for | C38A Check   |
| PLAT343_ALERT_2_G Unusual sp?                                       | Angle Range in Main Residue for | C39A Check   |
| PLAT343_ALERT_2_G Unusual sp?                                       | Angle Range in Main Residue for | C40A Check   |
| PLAT343_ALERT_2_G Unusual sp?                                       | Angle Range in Main Residue for | C43A Check   |
| PLAT343_ALERT_2_G Unusual sp?                                       | Angle Range in Main Residue for | C44A Check   |
| PLAT343_ALERT_2_G Unusual sp?                                       | Angle Range in Main Residue for | C45A Check   |
| PLAT343_ALERT_2_G Unusual sp?                                       | Angle Range in Main Residue for | C46A Check   |
| PLAT343_ALERT_2_G Unusual sp?                                       | Angle Range in Main Residue for | C49A Check   |
| PLAT343_ALERT_2_G Unusual sp?                                       | Angle Range in Main Residue for | C50A Check   |
| PLAT343_ALERT_2_G Unusual sp?                                       | Angle Range in Main Residue for | C51A Check   |
| PLAT343_ALERT_2_G Unusual sp?                                       | Angle Range in Main Residue for | C53A Check   |
| PLAT343_ALERT_2_G Unusual sp?                                       | Angle Range in Main Residue for | C55A Check   |
| PLAT343_ALERT_2_G Unusual sp?                                       | Angle Range in Main Residue for | C56A Check   |
| PLAT343_ALERT_2_G Unusual sp?                                       | Angle Range in Main Residue for | C57A Check   |
| PLAT343_ALERT_2_G Unusual sp?                                       | Angle Range in Main Residue for | C59A Check   |
| PLAT432_ALERT_2_G Short Inter X...Y Contact C7A                     | ..C12 .                         | 3.19 Ang.    |
|                                                                     | x,y,z =                         | 1_555 Check  |
| PLAT432_ALERT_2_G Short Inter X...Y Contact C42                     | ..C47 .                         | 3.18 Ang.    |
|                                                                     | 1-x,1-y,1-z =                   | 2_666 Check  |
| PLAT793_ALERT_4_G Model has Chirality at C1                         | (Centro SpGr)                   | S Verify     |
| PLAT793_ALERT_4_G Model has Chirality at C21                        | (Centro SpGr)                   | S Verify     |
| PLAT860_ALERT_3_G Number of Least-Squares Restraints .....          |                                 | 707 Note     |
| PLAT883_ALERT_1_G Absent Datum for _atom_sites_solution_primary ..  |                                 | Please Do !  |
| PLAT910_ALERT_3_G Missing FCF Reflection(s) Below Theta(Min) [Deg]= |                                 | 2.96 Note    |
| 0 0 1,                                                              |                                 |              |
| PLAT912_ALERT_4_G Missing # of FCF Reflections Above STh/L=         | 0.600                           | 882 Note     |
| PLAT933_ALERT_2_G Number of HKL-OMIT Records in Embedded .res File  |                                 | 17 Note      |
| -3 1 0, -3 2 3, -2 1 4, -2 2 2, -1 1 4,                             | 0 -3 5,                         |              |
| 0 -2 4, 0 -1 1, 0 -1 2, 0 1 1, 0 1 4,                               | 1 -1 3,                         |              |
| 1 0 2, 1 0 3, 1 1 2, 2 0 4, 3 -2 1,                                 |                                 |              |
| PLAT965_ALERT_2_G The SHELXL WEIGHT Optimisation has not Converged  |                                 | Please Check |
| PLAT969_ALERT_5_G The 'Henn et al.' R-Factor-gap value .....        |                                 | 12.683 Note  |
| Predicted wr2: Based on SigI**2                                     | 1.94 or SHELX Weight            | 24.43        |
| PLAT978_ALERT_2_G Number C-C Bonds with Positive Residual Density.  |                                 | 1 Info       |

---

0 **ALERT level A** = Most likely a serious problem - resolve or explain  
9 **ALERT level B** = A potentially serious problem, consider carefully  
93 **ALERT level C** = Check. Ensure it is not caused by an omission or oversight  
66 **ALERT level G** = General information/check it is not something unexpected

5 ALERT type 1 CIF construction/syntax error, inconsistent or missing data  
105 ALERT type 2 Indicator that the structure model may be wrong or deficient  
12 ALERT type 3 Indicator that the structure quality may be low  
44 ALERT type 4 Improvement, methodology, query or suggestion  
2 ALERT type 5 Informative message, check

---

## Validation response form

Please find below a validation response form (VRF) that can be filled in and pasted into your CIF.

```
# start Validation Reply Form
_vrf_DIFMN03_ck-6n-qdi-c60-new_auto
;
PROBLEM: The minimum difference density is < -0.1*ZMAX*0.75
RESPONSE: ...
;
_vrf_DIFMX02_ck-6n-qdi-c60-new_auto
;
PROBLEM: The maximum difference density is > 0.1*ZMAX*0.75
RESPONSE: ...
;
_vrf_PLAT042_ck-6n-qdi-c60-new_auto
;
PROBLEM: Calc. and Reported MoietyFormula Strings Differ      Please Check
RESPONSE: ...
;
_vrf_PLAT082_ck-6n-qdi-c60-new_auto
;
PROBLEM: High R1 Value .....                                0.12 Report
RESPONSE: ...
;
_vrf_PLAT213_ck-6n-qdi-c60-new_auto
;
PROBLEM: Atom C78A          has ADP max/min Ratio .....      3.1 prolat
RESPONSE: ...
;
_vrf_PLAT214_ck-6n-qdi-c60-new_auto
;
PROBLEM: Atom C8A          (Anion/Solvent) ADP max/min Ratio    4.6 prolat
RESPONSE: ...
;
_vrf_PLAT220_ck-6n-qdi-c60-new_auto
;
PROBLEM: NonSolvent  Resd 1  C   Ueq(max)/Ueq(min) Range        4.4 Ratio
RESPONSE: ...
;
_vrf_PLAT222_ck-6n-qdi-c60-new_auto
;
PROBLEM: NonSolvent  Resd 1  H   Uiso(max)/Uiso(min) Range      4.9 Ratio
RESPONSE: ...
;
_vrf_PLAT234_ck-6n-qdi-c60-new_auto
;
PROBLEM: Large Hirshfeld Difference C77      --C78A      .      0.22 Ang.
RESPONSE: ...
;
_vrf_PLAT241_ck-6n-qdi-c60-new_auto
;
PROBLEM: High      'MainMol' Ueq as Compared to Neighbors of    C13A Check
RESPONSE: ...
;
_vrf_PLAT242_ck-6n-qdi-c60-new_auto
;
PROBLEM: Low      'MainMol' Ueq as Compared to Neighbors of      C23 Check
RESPONSE: ...
```

```

;
_vrf_PLAT260_ck-6n-qdi-c60-new_auto
;
PROBLEM: Large Average Ueq of Residue Including          C1A          0.121 Check
RESPONSE: ...
;
_vrf_PLAT601_ck-6n-qdi-c60-new_auto
;
PROBLEM: Unit-Cell Contains Solvent Accessible VOIDS .LE.          41 Ang**3
RESPONSE: ...
;
_vrf_PLAT906_ck-6n-qdi-c60-new_auto
;
PROBLEM: Large K Value in the Analysis of Variance .....          9.132 Check
RESPONSE: ...
;
_vrf_PLAT911_ck-6n-qdi-c60-new_auto
;
PROBLEM: Missing FCF Refl Between Thmin & STh/L=          0.600          33 Report
RESPONSE: ...
;
_vrf_PLAT918_ck-6n-qdi-c60-new_auto
;
PROBLEM: Reflection(s) with I(obs) much Smaller I(calc) .          16 Check
RESPONSE: ...
;
_vrf_PLAT939_ck-6n-qdi-c60-new_auto
;
PROBLEM: Large Value of Not (SHELXL) Weight Optimized S .          13.20 Check
RESPONSE: ...
;
_vrf_PLAT971_ck-6n-qdi-c60-new_auto
;
PROBLEM: Check Calcd Resid. Dens. 0.94Ang From C42A          1.82 eA-3
RESPONSE: ...
;
# end Validation Reply Form

```

---

It is advisable to attempt to resolve as many as possible of the alerts in all categories. Often the minor alerts point to easily fixed oversights, errors and omissions in your CIF or refinement strategy, so attention to these fine details can be worthwhile. It is up to the individual to critically assess their own results and, if necessary, seek expert advice.

---

**PLATON version of 26/09/2025; check.def file version of 20/09/2025**

---

# duplicate check

No duplication found

Datablock ck-6n-qdi-c60-new\_auto - ellipsoid plot

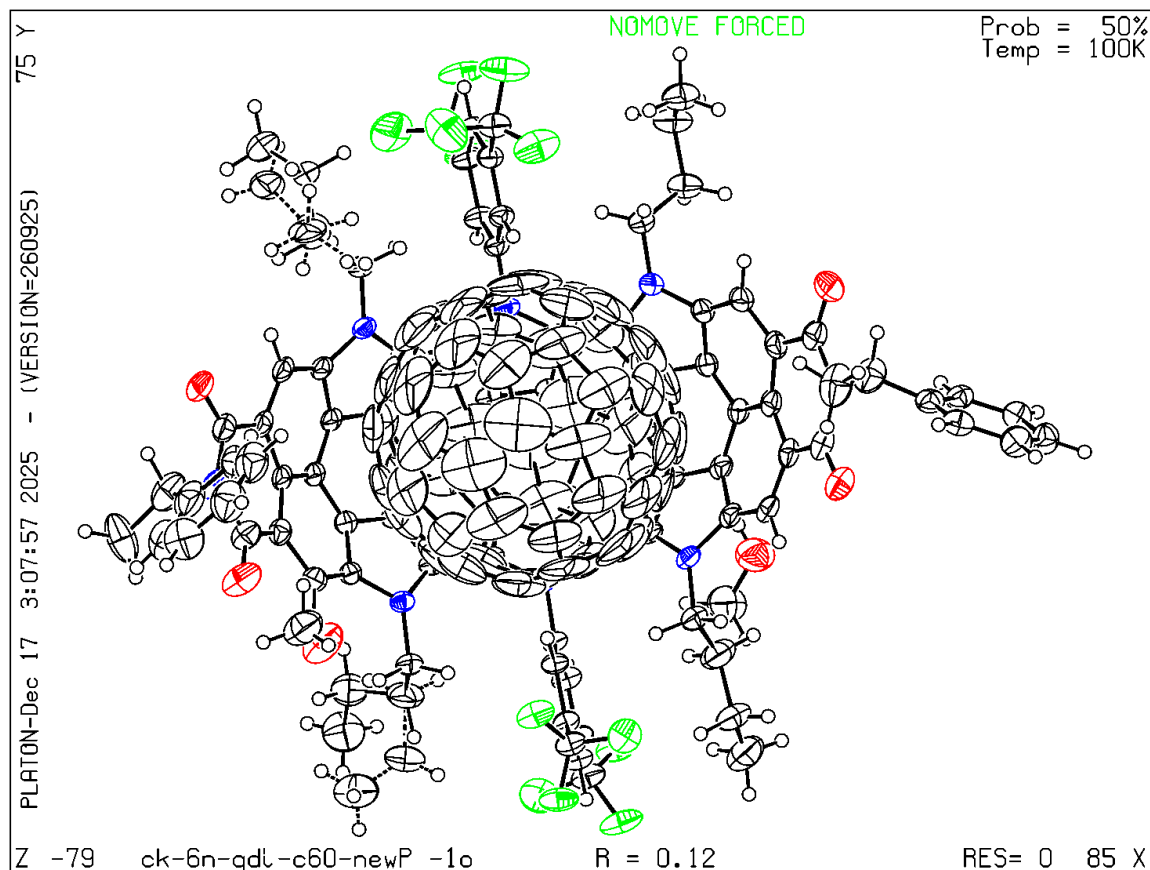

Supplement: Supplementary file 1 [file 1e8d4ac2b4771ffe268e01a6.pdf]
