# Supplementary material for: N-Bordered Rylene Arches via Programmable Curved π-Extension
Source: Research Square preprint supplement (doi:10.21203/rs.3.rs-8245215/v1), 2026-01-09
Supplement: Supplementary file 1 [file bcd85d74a0f621a52202e87e.xlsx]

## Sheet: Fig4a
UV-vis Absorption Spectra (QDI)		UV-vis Absorption Spectra (5)		UV-vis Absorption Spectra (9)
Wavelength (nm)	ε (L*mol-1*cm-1)	Wavelength (nm)	ε (L*mol-1*cm-1)	Wavelength (nm)	ε (L*mol-1*cm-1)
300	9236.7	300	31500	300.5	71800
302	8428.76	300.1	31400	301	70900
304	7824.93	300.2	31400	301.5	69900
306	7319.89	300.3	31300	302	68600
308	6938.86	300.4	31200	302.5	67400
310	6616.7	300.5	31200	303	66300
312	6438	300.6	31100	303.5	65200
314	6349.06	300.7	31000	304	64100
316	6312.34	300.8	31000	304.5	63000
318	6294.48	300.9	30900	305	62000
320	6302.94	301	30800	305.5	61100
322	6277.32	301.1	30700	306	60200
324	6226.53	301.2	30600	306.5	59300
326	6130.51	301.3	30600	307	58500
328	5976.65	301.4	30500	307.5	57600
330	5776.24	301.5	30400	308	56900
332	5568.41	301.6	30300	308.5	56100
334	5390	301.7	30200	309	55400
336	5270.28	301.8	30100	309.5	54700
338	5177.1	301.9	30000	310	54000
340	5134.84	302	29900	310.5	53400
342	5198.45	302.1	29800	311	52800
344	5308.21	302.2	29800	311.5	52200
346	5511.78	302.3	29700	312	51700
348	5743.62	302.4	29600	312.5	51200
350	5990.68	302.5	29500	313	50700
352	6224.56	302.6	29400	313.5	50300
354	6417.92	302.7	29300	314	49900
356	6549.66	302.8	29300	314.5	49500
358	6654.44	302.9	29200	315	49100
360	6773.16	303	29100	315.5	48800
362	6938.78	303.1	29000	316	48400
364	7182.65	303.2	28900	316.5	48100
366	7558.54	303.3	28900	317	47800
368	8134.8	303.4	28800	317.5	47500
370	8757.48	303.5	28700	318	47200
372	9338.07	303.6	28600	318.5	46900
374	9746	303.7	28500	319	46600
376	9959.03	303.8	28500	319.5	46300
378	9933.49	303.9	28400	320	46000
380	9605.13	304	28300	320.5	45700
382	8879.27	304.1	28200	321	45400
384	7894.77	304.2	28100	321.5	45100
386	6701.59	304.3	28100	322	44700
388	5551.01	304.4	28000	322.5	44400
390	4519.85	304.5	27900	323	44000
392	3721.57	304.6	27800	323.5	43600
394	3127.25	304.7	27800	324	43200
396	2660.75	304.8	27700	324.5	42800
398	2303.6	304.9	27600	325	42400
400	2027.15	305	27500	325.5	42000
402	1786.06	305.1	27400	326	41600
404	1597.3	305.2	27400	326.5	41100
406	1465.25	305.3	27300	327	40700
408	1346.71	305.4	27200	327.5	40200
410	1258.4	305.5	27100	328	39800
412	1183.97	305.6	27000	328.5	39300
414	1100.82	305.7	27000	329	38800
416	1005.52	305.8	26900	329.5	38400
418	923.744	305.9	26800	330	37900
420	838.463	306	26700	330.5	37500
422	760.629	306.1	26600	331	37100
424	690.114	306.2	26600	331.5	36600
426	640.319	306.3	26500	332	36200
428	591.377	306.4	26400	332.5	35800
430	564.369	306.5	26300	333	35400
432	552.601	306.6	26200	333.5	35000
434	542.127	306.7	26200	334	34600
436	540.368	306.8	26100	334.5	34200
438	527.248	306.9	26000	335	33800
440	525.644	307	25900	335.5	33400
442	514.231	307.1	25800	336	33000
444	514.938	307.2	25800	336.5	32600
446	516.518	307.3	25700	337	32100
448	544.509	307.4	25600	337.5	31700
450	549.043	307.5	25500	338	31300
452	531.783	307.6	25500	338.5	30900
454	526.315	307.7	25400	339	30500
456	547.162	307.8	25300	339.5	30000
458	555.605	307.9	25200	340	29600
460	559.209	308	25100	340.5	29100
462	573.618	308.1	25100	341	28700
464	599.965	308.2	25000	341.5	28200
466	654.916	308.3	24900	342	27800
468	705.255	308.4	24800	342.5	27300
470	716.638	308.5	24800	343	26900
472	734.666	308.6	24700	343.5	26500
474	755.346	308.7	24600	344	26000
476	763.598	308.8	24500	344.5	25600
478	788.058	308.9	24400	345	25100
480	820.06	309	24400	345.5	24700
482	806.684	309.1	24300	346	24300
484	750.282	309.2	24200	346.5	23900
486	663.193	309.3	24200	347	23400
488	578.653	309.4	24100	347.5	23000
490	523.386	309.5	24000	348	22600
492	485.177	309.6	23900	348.5	22200
494	463.844	309.7	23900	349	21800
496	466.096	309.8	23800	349.5	21400
498	531.304	309.9	23700	350	21000
500	621.154	310	23600	350.5	20700
502	717.593	310.1	23600	351	20300
504	803.504	310.2	23500	351.5	20000
506	866.811	310.3	23400	352	19600
508	909.639	310.4	23300	352.5	19300
510	931.78	310.5	23300	353	18900
512	902.183	310.6	23200	353.5	18600
514	852.156	310.7	23100	354	18200
516	766.353	310.8	23000	354.5	17900
518	654.291	310.9	23000	355	17600
520	551.581	311	22900	355.5	17300
522	463.857	311.1	22800	356	17000
524	403.609	311.2	22700	356.5	16600
526	367.045	311.3	22600	357	16400
528	368.032	311.4	22600	357.5	16100
530	383.6	311.5	22500	358	15800
532	418.616	311.6	22400	358.5	15500
534	461.181	311.7	22300	359	15300
536	513.202	311.8	22200	359.5	15000
538	568.473	311.9	22200	360	14800
540	642.028	312	22100	360.5	14600
542	719.328	312.1	22000	361	14300
544	814.974	312.2	21900	361.5	14100
546	907.726	312.3	21800	362	13900
548	1017.41	312.4	21800	362.5	13800
550	1135.68	312.5	21700	363	13600
552	1270.99	312.6	21600	363.5	13400
554	1418.56	312.7	21500	364	13300
556	1576.31	312.8	21400	364.5	13200
558	1750.18	312.9	21400	365	13100
560	1946.22	313	21300	365.5	12900
562	2134.94	313.1	21200	366	12800
564	2338.43	313.2	21100	366.5	12700
566	2554.22	313.3	21000	367	12600
568	2744.63	313.4	21000	367.5	12600
570	2954.47	313.5	20900	368	12500
572	3144.5	313.6	20800	368.5	12400
574	3335.05	313.7	20700	369	12300
576	3521.84	313.8	20600	369.5	12300
578	3723.94	313.9	20600	370	12200
580	3920.48	314	20500	370.5	12100
582	4126.88	314.1	20400	371	12100
584	4349.84	314.2	20300	371.5	12000
586	4587.26	314.3	20200	372	12000
588	4836.83	314.4	20100	372.5	11900
590	5135.59	314.5	20100	373	11900
592	5474.5	314.6	20000	373.5	11800
594	5848.91	314.7	19900	374	11800
596	6273.95	314.8	19800	374.5	11700
598	6785.14	314.9	19800	375	11700
600	7336.91	315	19700	375.5	11600
602	7984.55	315.1	19600	376	11600
604	8686.49	315.2	19500	376.5	11600
606	9463.49	315.3	19500	377	11500
608	10272.3	315.4	19400	377.5	11500
610	11074.8	315.5	19300	378	11500
612	11905.3	315.6	19200	378.5	11400
614	12743.8	315.7	19200	379	11400
616	13616	315.8	19100	379.5	11400
618	14387.9	315.9	19000	380	11300
620	15115.3	316	18900	380.5	11300
622	15776.3	316.1	18900	381	11300
624	16363.6	316.2	18800	381.5	11300
626	16929.9	316.3	18700	382	11300
628	17450.9	316.4	18700	382.5	11300
630	17937.5	316.5	18600	383	11200
632	18373.5	316.6	18500	383.5	11200
634	18826.5	316.7	18400	384	11200
636	19304.9	316.8	18400	384.5	11200
638	19828.5	316.9	18300	385	11200
640	20419.1	317	18200	385.5	11200
642	21097.8	317.1	18200	386	11200
644	21856.7	317.2	18100	386.5	11300
646	22733.3	317.3	18000	387	11300
648	23723.1	317.4	17900	387.5	11300
650	24780.9	317.5	17900	388	11300
652	26038.4	317.6	17800	388.5	11300
654	27453.8	317.7	17700	389	11300
656	29128.3	317.8	17700	389.5	11400
658	30949.1	317.9	17600	390	11400
660	33039.8	318	17500	390.5	11400
662	35224.6	318.1	17500	391	11500
664	37698.7	318.2	17400	391.5	11500
666	40282.5	318.3	17300	392	11500
668	42872.8	318.4	17300	392.5	11600
670	45596.7	318.5	17200	393	11600
672	48142.2	318.6	17100	393.5	11700
674	50614.3	318.7	17100	394	11800
676	52838	318.8	17000	394.5	11800
678	54704.7	318.9	16900	395	11900
680	56354.2	319	16900	395.5	11900
682	57598.2	319.1	16800	396	12000
684	58450.6	319.2	16700	396.5	12100
686	58987.2	319.3	16700	397	12100
688	59268.4	319.4	16600	397.5	12200
690	59373.2	319.5	16500	398	12300
692	59309	319.6	16400	398.5	12400
694	59126.6	319.7	16400	399	12500
696	58933.1	319.8	16300	399.5	12600
698	58623.9	319.9	16300	400	12600
700	58392.7	320	16200	400.5	12700
702	58108.8	320.1	16100	401	12800
704	57835	320.2	16100	401.5	12900
706	57627.5	320.3	16000	402	13000
708	57541.6	320.4	16000	402.5	13000
710	57544.1	320.5	15900	403	13100
712	57664.7	320.6	15800	403.5	13200
714	58024.9	320.7	15800	404	13200
716	58664.5	320.8	15700	404.5	13300
718	59598.7	320.9	15700	405	13300
720	60864.4	321	15600	405.5	13400
722	62536.9	321.1	15600	406	13400
724	64685.8	321.2	15500	406.5	13500
726	67279.9	321.3	15400	407	13500
728	70388.4	321.4	15400	407.5	13600
730	74081.6	321.5	15300	408	13600
732	78289.9	321.6	15300	408.5	13600
734	82693.1	321.7	15200	409	13700
736	87909.9	321.8	15200	409.5	13700
738	94131.3	321.9	15100	410	13700
740	100403	322	15100	410.5	13800
742	106922	322.1	15000	411	13800
744	113399	322.2	15000	411.5	13800
746	120231	322.3	14900	412	13900
748	126567	322.4	14900	412.5	13900
750	132216	322.5	14800	413	14000
752	136791	322.6	14800	413.5	14000
754	140482	322.7	14700	414	14100
756	142709	322.8	14700	414.5	14100
758	143217	322.9	14600	415	14200
760	141648	323	14500	415.5	14200
762	137406	323.1	14500	416	14300
764	132931	323.2	14400	416.5	14300
766	128695	323.3	14400	417	14400
768	122633	323.4	14400	417.5	14400
770	113987	323.5	14300	418	14400
772	104743	323.6	14300	418.5	14500
774	95427.9	323.7	14200	419	14500
776	86024.3	323.8	14200	419.5	14500
778	76906.5	323.9	14100	420	14600
780	67953.7	324	14100	420.5	14600
782	59483.4	324.1	14000	421	14600
784	51682.9	324.2	14000	421.5	14600
786	44460.1	324.3	13900	422	14700
788	37571	324.4	13900	422.5	14700
790	31924.7	324.5	13800	423	14700
792	27501.2	324.6	13800	423.5	14700
794	23279.8	324.7	13700	424	14800
796	19216.2	324.8	13700	424.5	14800
798	16022.4	324.9	13700	425	14800
800	13529.8	325	13600	425.5	14900
802	11293.8	325.1	13600	426	14900
804	9431.99	325.2	13500	426.5	15000
806	7800.33	325.3	13500	427	15000
808	6495.95	325.4	13400	427.5	15100
810	5506.14	325.5	13400	428	15100
812	4572.6	325.6	13400	428.5	15200
814	3776.31	325.7	13300	429	15200
816	3128.05	325.8	13300	429.5	15300
818	2523.82	325.9	13200	430	15300
820	2012.72	326	13200	430.5	15300
822	1775.24	326.1	13100	431	15400
824	1613.51	326.2	13100	431.5	15400
826	1405.13	326.3	13000	432	15400
828	1199.76	326.4	13000	432.5	15400
830	1045.39	326.5	13000	433	15300
832	873.661	326.6	12900	433.5	15300
834	779.581	326.7	12900	434	15300
836	684.814	326.8	12900	434.5	15200
838	599.073	326.9	12800	435	15100
840	516.13	327	12800	435.5	15100
842	456.097	327.1	12700	436	15000
844	418.323	327.2	12700	436.5	14900
846	366.87	327.3	12700	437	14800
848	306.177	327.4	12600	437.5	14700
850	310.678	327.5	12600	438	14700
852	252.046	327.6	12500	438.5	14600
854	206.702	327.7	12500	439	14500
856	204.145	327.8	12500	439.5	14500
858	142.785	327.9	12400	440	14400
860	118.065	328	12400	440.5	14400
862	126.853	328.1	12400	441	14300
864	73.9945	328.2	12300	441.5	14300
866	54.3705	328.3	12300	442	14300
868	57.6892	328.4	12300	442.5	14200
870	24.1854	328.5	12200	443	14200
872	19.124	328.6	12200	443.5	14200
874	5.8831	328.7	12100	444	14200
876	-21.4648	328.8	12100	444.5	14100
878	-2.78721	328.9	12100	445	14100
880	-36.7841	329	12000	445.5	14000
882	-85.7244	329.1	12000	446	14000
884	-119.996	329.2	12000	446.5	13900
886	-115.816	329.3	11900	447	13800
888	-91.9718	329.4	11900	447.5	13700
890	-83.0045	329.5	11800	448	13600
892	-74.5912	329.6	11800	448.5	13500
894	-103.587	329.7	11800	449	13400
896	-128.484	329.8	11700	449.5	13200
898	-134.129	329.9	11700	450	13100
900	-106.667	330	11700	450.5	12900
902	-101.277	330.1	11600	451	12800
904	-137.787	330.2	11600	451.5	12600
906	-167.502	330.3	11600	452	12500
908	-144.192	330.4	11500	452.5	12300
910	-122.386	330.5	11500	453	12200
912	-98.813	330.6	11500	453.5	12100
914	-144.426	330.7	11400	454	11900
916	-179.341	330.8	11400	454.5	11800
918	-185.399	330.9	11400	455	11700
920	-158.691	331	11300	455.5	11600
922	-161.849	331.1	11300	456	11500
924	-152.985	331.2	11300	456.5	11400
926	-151.842	331.3	11300	457	11400
928	-141.413	331.4	11200	457.5	11300
930	-161.858	331.5	11200	458	11300
932	-150.683	331.6	11200	458.5	11200
934	-147.762	331.7	11100	459	11200
936	-161.806	331.8	11100	459.5	11200
938	-189.798	331.9	11100	460	11200
940	-204.527	332	11100	460.5	11200
942	-182.012	332.1	11000	461	11200
944	-190.028	332.2	11000	461.5	11200
946	-174.81	332.3	11000	462	11200
948	-174.641	332.4	11000	462.5	11200
950	-193.261	332.5	11000	463	11200
952	-240.458	332.6	10900	463.5	11200
954	-220.375	332.7	10900	464	11300
956	-216.891	332.8	10900	464.5	11300
958	-185.297	332.9	10900	465	11300
960	-196.967	333	10800	465.5	11300
962	-163.135	333.1	10800	466	11400
964	-197.216	333.2	10800	466.5	11400
966	-161.203	333.3	10800	467	11500
968	-173.994	333.4	10800	467.5	11500
970	-242.811	333.5	10700	468	11600
972	-209.063	333.6	10700	468.5	11600
974	-239.064	333.7	10700	469	11700
976	-166.199	333.8	10700	469.5	11700
978	-228.08	333.9	10700	470	11800
980	-296.711	334	10600	470.5	11900
982	-320.865	334.1	10600	471	12000
984	-270.682	334.2	10600	471.5	12100
986	-179.25	334.3	10600	472	12200
988	-193.327	334.4	10600	472.5	12300
990	-226.015	334.5	10500	473	12400
992	-306.611	334.6	10500	473.5	12500
994	-320.935	334.7	10500	474	12700
996	-320.251	334.8	10500	474.5	12800
998	-202.229	334.9	10500	475	13000
1000	-229.024	335	10400	475.5	13200
		335.1	10400	476	13400
		335.2	10400	476.5	13600
		335.3	10400	477	13800
		335.4	10400	477.5	14000
		335.5	10300	478	14200
		335.6	10300	478.5	14400
		335.7	10300	479	14700
		335.8	10300	479.5	14900
		335.9	10300	480	15100
		336	10300	480.5	15400
		336.1	10200	481	15600
		336.2	10200	481.5	15900
		336.3	10200	482	16100
		336.4	10200	482.5	16300
		336.5	10200	483	16600
		336.6	10200	483.5	16800
		336.7	10200	484	17000
		336.8	10100	484.5	17300
		336.9	10100	485	17500
		337	10100	485.5	17700
		337.1	10100	486	18000
		337.2	10100	486.5	18200
		337.3	10100	487	18400
		337.4	10100	487.5	18600
		337.5	10100	488	18800
		337.6	10100	488.5	19000
		337.7	10100	489	19200
		337.8	10000	489.5	19400
		337.9	10000	490	19600
		338	10000	490.5	19800
		338.1	10000	491	19900
		338.2	10000	491.5	20100
		338.3	10000	492	20200
		338.4	10000	492.5	20400
		338.5	10000	493	20500
		338.6	10000	493.5	20600
		338.7	9900	494	20800
		338.8	9900	494.5	20900
		338.9	9900	495	20900
		339	9900	495.5	21000
		339.1	9900	496	21100
		339.2	9900	496.5	21200
		339.3	9900	497	21200
		339.4	9900	497.5	21200
		339.5	9900	498	21300
		339.6	9800	498.5	21300
		339.7	9800	499	21300
		339.8	9800	499.5	21300
		339.9	9800	500	21300
		340	9800	500.5	21300
		340.1	9800	501	21300
		340.2	9800	501.5	21300
		340.3	9800	502	21300
		340.4	9700	502.5	21400
		340.5	9700	503	21400
		340.6	9700	503.5	21400
		340.7	9700	504	21500
		340.8	9700	504.5	21600
		340.9	9700	505	21700
		341	9700	505.5	21800
		341.1	9600	506	21900
		341.2	9600	506.5	22100
		341.3	9600	507	22300
		341.4	9600	507.5	22500
		341.5	9600	508	22700
		341.6	9600	508.5	22900
		341.7	9600	509	23200
		341.8	9600	509.5	23500
		341.9	9600	510	23800
		342	9500	510.5	24100
		342.1	9500	511	24400
		342.2	9500	511.5	24700
		342.3	9500	512	25100
		342.4	9500	512.5	25400
		342.5	9500	513	25700
		342.6	9500	513.5	26100
		342.7	9500	514	26400
		342.8	9500	514.5	26800
		342.9	9500	515	27100
		343	9500	515.5	27400
		343.1	9500	516	27700
		343.2	9500	516.5	28000
		343.3	9500	517	28300
		343.4	9500	517.5	28600
		343.5	9500	518	28800
		343.6	9500	518.5	29100
		343.7	9500	519	29300
		343.8	9500	519.5	29500
		343.9	9500	520	29800
		344	9500	520.5	29900
		344.1	9500	521	30100
		344.2	9500	521.5	30300
		344.3	9500	522	30500
		344.4	9500	522.5	30600
		344.5	9500	523	30800
		344.6	9500	523.5	30900
		344.7	9500	524	31100
		344.8	9500	524.5	31200
		344.9	9500	525	31300
		345	9500	525.5	31400
		345.1	9500	526	31400
		345.2	9400	526.5	31500
		345.3	9400	527	31600
		345.4	9400	527.5	31600
		345.5	9400	528	31600
		345.6	9400	528.5	31600
		345.7	9400	529	31600
		345.8	9500	529.5	31600
		345.9	9500	530	31500
		346	9500	530.5	31400
		346.1	9500	531	31300
		346.2	9500	531.5	31100
		346.3	9500	532	30900
		346.4	9500	532.5	30700
		346.5	9500	533	30500
		346.6	9500	533.5	30200
		346.7	9500	534	29900
		346.8	9500	534.5	29600
		346.9	9500	535	29200
		347	9500	535.5	28800
		347.1	9500	536	28300
		347.2	9500	536.5	27900
		347.3	9500	537	27400
		347.4	9500	537.5	26900
		347.5	9500	538	26300
		347.6	9500	538.5	25800
		347.7	9500	539	25200
		347.8	9600	539.5	24600
		347.9	9600	540	24000
		348	9600	540.5	23400
		348.1	9600	541	22900
		348.2	9600	541.5	22300
		348.3	9600	542	21700
		348.4	9600	542.5	21200
		348.5	9600	543	20700
		348.6	9600	543.5	20100
		348.7	9600	544	19600
		348.8	9600	544.5	19200
		348.9	9600	545	18700
		349	9700	545.5	18300
		349.1	9700	546	17900
		349.2	9700	546.5	17600
		349.3	9700	547	17200
		349.4	9700	547.5	16900
		349.5	9700	548	16600
		349.6	9700	548.5	16300
		349.7	9700	549	16000
		349.8	9700	549.5	15800
		349.9	9700	550	15600
		350	9700	550.5	15400
		350.1	9800	551	15300
		350.2	9800	551.5	15200
		350.3	9800	552	15100
		350.4	9800	552.5	15000
		350.5	9800	553	14900
		350.6	9800	553.5	14900
		350.7	9800	554	14900
		350.8	9800	554.5	14900
		350.9	9900	555	14900
		351	9900	555.5	14900
		351.1	9900	556	15000
		351.2	9900	556.5	15100
		351.3	9900	557	15200
		351.4	9900	557.5	15300
		351.5	9900	558	15400
		351.6	9900	558.5	15500
		351.7	10000	559	15700
		351.8	10000	559.5	15900
		351.9	10000	560	16100
		352	10000	560.5	16300
		352.1	10000	561	16500
		352.2	10000	561.5	16700
		352.3	10000	562	17000
		352.4	10000	562.5	17300
		352.5	10100	563	17600
		352.6	10100	563.5	17900
		352.7	10100	564	18200
		352.8	10100	564.5	18500
		352.9	10100	565	18900
		353	10100	565.5	19200
		353.1	10100	566	19600
		353.2	10100	566.5	20000
		353.3	10200	567	20400
		353.4	10200	567.5	20800
		353.5	10200	568	21200
		353.6	10200	568.5	21600
		353.7	10200	569	22000
		353.8	10200	569.5	22500
		353.9	10200	570	22900
		354	10200	570.5	23400
		354.1	10200	571	23800
		354.2	10200	571.5	24300
		354.3	10300	572	24700
		354.4	10300	572.5	25100
		354.5	10300	573	25600
		354.6	10300	573.5	26000
		354.7	10300	574	26400
		354.8	10300	574.5	26800
		354.9	10300	575	27200
		355	10300	575.5	27500
		355.1	10300	576	27800
		355.2	10300	576.5	28200
		355.3	10300	577	28500
		355.4	10300	577.5	28700
		355.5	10300	578	29000
		355.6	10300	578.5	29200
		355.7	10300	579	29500
		355.8	10300	579.5	29600
		355.9	10300	580	29800
		356	10400	580.5	29900
		356.1	10400	581	30100
		356.2	10400	581.5	30100
		356.3	10400	582	30200
		356.4	10400	582.5	30300
		356.5	10400	583	30300
		356.6	10400	583.5	30300
		356.7	10400	584	30300
		356.8	10400	584.5	30300
		356.9	10400	585	30300
		357	10400	585.5	30300
		357.1	10400	586	30200
		357.2	10400	586.5	30200
		357.3	10400	587	30100
		357.4	10400	587.5	30100
		357.5	10300	588	30000
		357.6	10300	588.5	30000
		357.7	10300	589	30000
		357.8	10300	589.5	29900
		357.9	10300	590	29900
		358	10300	590.5	29900
		358.1	10300	591	29900
		358.2	10300	591.5	30000
		358.3	10300	592	30000
		358.4	10300	592.5	30000
		358.5	10300	593	30100
		358.6	10300	593.5	30200
		358.7	10300	594	30300
		358.8	10300	594.5	30400
		358.9	10300	595	30600
		359	10300	595.5	30700
		359.1	10300	596	30900
		359.2	10300	596.5	31100
		359.3	10300	597	31300
		359.4	10300	597.5	31500
		359.5	10300	598	31800
		359.6	10300	598.5	32000
		359.7	10300	599	32300
		359.8	10300	599.5	32600
		359.9	10300	600	32900
		360	10300	600.5	33100
		360.1	10300	601	33400
		360.2	10200	601.5	33800
		360.3	10200	602	34100
		360.4	10200	602.5	34400
		360.5	10200	603	34700
		360.6	10200	603.5	35100
		360.7	10200	604	35500
		360.8	10200	604.5	35800
		360.9	10200	605	36200
		361	10200	605.5	36600
		361.1	10300	606	37000
		361.2	10300	606.5	37400
		361.3	10300	607	37800
		361.4	10300	607.5	38300
		361.5	10300	608	38700
		361.6	10300	608.5	39200
		361.7	10300	609	39700
		361.8	10300	609.5	40200
		361.9	10300	610	40700
		362	10300	610.5	41300
		362.1	10300	611	41900
		362.2	10300	611.5	42500
		362.3	10300	612	43200
		362.4	10300	612.5	43800
		362.5	10300	613	44500
		362.6	10300	613.5	45300
		362.7	10300	614	46000
		362.8	10300	614.5	46800
		362.9	10300	615	47600
		363	10300	615.5	48400
		363.1	10300	616	49300
		363.2	10300	616.5	50100
		363.3	10300	617	51000
		363.4	10300	617.5	52000
		363.5	10300	618	53000
		363.6	10400	618.5	54000
		363.7	10400	619	55000
		363.8	10400	619.5	56100
		363.9	10400	620	57100
		364	10400	620.5	58100
		364.1	10400	621	59200
		364.2	10400	621.5	60200
		364.3	10400	622	61200
		364.4	10400	622.5	62200
		364.5	10400	623	63100
		364.6	10400	623.5	64000
		364.7	10400	624	64900
		364.8	10400	624.5	65800
		364.9	10500	625	66600
		365	10500	625.5	67300
		365.1	10500	626	68000
		365.2	10500	626.5	68600
		365.3	10500	627	69200
		365.4	10500	627.5	69700
		365.5	10500	628	70100
		365.6	10500	628.5	70400
		365.7	10500	629	70700
		365.8	10600	629.5	70900
		365.9	10600	630	71000
		366	10600	630.5	71100
		366.1	10600	631	71000
		366.2	10600	631.5	70900
		366.3	10600	632	70700
		366.4	10600	632.5	70400
		366.5	10600	633	70000
		366.6	10700	633.5	69600
		366.7	10700	634	69100
		366.8	10700	634.5	68600
		366.9	10700	635	68000
		367	10700	635.5	67400
		367.1	10700	636	66800
		367.2	10800	636.5	66100
		367.3	10800	637	65300
		367.4	10800	637.5	64600
		367.5	10800	638	63800
		367.6	10800	638.5	63000
		367.7	10800	639	62300
		367.8	10900	639.5	61500
		367.9	10900	640	60700
		368	10900	640.5	60000
		368.1	10900	641	59200
		368.2	10900	641.5	58500
		368.3	10900	642	57800
		368.4	10900	642.5	57100
		368.5	11000	643	56400
		368.6	11000	643.5	55800
		368.7	11000	644	55200
		368.8	11000	644.5	54600
		368.9	11000	645	54100
		369	11000	645.5	53600
		369.1	11000	646	53100
		369.2	11000	646.5	52700
		369.3	11100	647	52300
		369.4	11100	647.5	51900
		369.5	11100	648	51500
		369.6	11100	648.5	51200
		369.7	11100	649	50900
		369.8	11100	649.5	50600
		369.9	11100	650	50300
		370	11100	650.5	50100
		370.1	11100	651	49900
		370.2	11100	651.5	49600
		370.3	11100	652	49400
		370.4	11200	652.5	49200
		370.5	11200	653	49000
		370.6	11200	653.5	48700
		370.7	11200	654	48500
		370.8	11200	654.5	48200
		370.9	11200	655	48000
		371	11200	655.5	47700
		371.1	11200	656	47300
		371.2	11200	656.5	47000
		371.3	11200	657	46600
		371.4	11200	657.5	46200
		371.5	11200	658	45700
		371.6	11200	658.5	45200
		371.7	11200	659	44700
		371.8	11200	659.5	44100
		371.9	11200	660	43500
		372	11200	660.5	42900
		372.1	11200	661	42300
		372.2	11200	661.5	41700
		372.3	11200	662	41000
		372.4	11200	662.5	40400
		372.5	11200	663	39800
		372.6	11200	663.5	39100
		372.7	11200	664	38500
		372.8	11100	664.5	37800
		372.9	11100	665	37100
		373	11100	665.5	36400
		373.1	11100	666	35600
		373.2	11100	666.5	34900
		373.3	11100	667	34100
		373.4	11100	667.5	33400
		373.5	11100	668	32600
		373.6	11100	668.5	31800
		373.7	11000	669	31000
		373.8	11000	669.5	30200
		373.9	11000	670	29400
		374	11000	670.5	28600
		374.1	11000	671	27800
		374.2	11000	671.5	27000
		374.3	10900	672	26200
		374.4	10900	672.5	25400
		374.5	10900	673	24600
		374.6	10900	673.5	23800
		374.7	10900	674	23000
		374.8	10800	674.5	22300
		374.9	10800	675	21500
		375	10800	675.5	20800
		375.1	10800	676	20100
		375.2	10800	676.5	19500
		375.3	10700	677	18800
		375.4	10700	677.5	18200
		375.5	10700	678	17500
		375.6	10700	678.5	16900
		375.7	10700	679	16300
		375.8	10600	679.5	15700
		375.9	10600	680	15200
		376	10600	680.5	14600
		376.1	10600	681	14100
		376.2	10500	681.5	13600
		376.3	10500	682	13100
		376.4	10500	682.5	12600
		376.5	10500	683	12200
		376.6	10400	683.5	11700
		376.7	10400	684	11300
		376.8	10400	684.5	10800
		376.9	10300	685	10400
		377	10300	685.5	10000
		377.1	10300	686	9600
		377.2	10300	686.5	9300
		377.3	10200	687	8900
		377.4	10200	687.5	8500
		377.5	10200	688	8200
		377.6	10100	688.5	7900
		377.7	10100	689	7500
		377.8	10100	689.5	7200
		377.9	10000	690	6900
		378	10000	690.5	6600
		378.1	10000	691	6300
		378.2	10000	691.5	6000
		378.3	9900	692	5800
		378.4	9900	692.5	5500
		378.5	9900	693	5200
		378.6	9800	693.5	5000
		378.7	9800	694	4800
		378.8	9800	694.5	4500
		378.9	9800	695	4300
		379	9700	695.5	4100
		379.1	9700	696	3900
		379.2	9700	696.5	3700
		379.3	9600	697	3500
		379.4	9600	697.5	3300
		379.5	9600	698	3200
		379.6	9500	698.5	3000
		379.7	9500	699	2800
		379.8	9500	699.5	2700
		379.9	9400	700	2600
		380	9400	700.5	2400
		380.1	9400	701	2300
		380.2	9400	701.5	2200
		380.3	9300	702	2100
		380.4	9300	702.5	1900
		380.5	9300	703	1800
		380.6	9200	703.5	1700
		380.7	9200	704	1600
		380.8	9200	704.5	1500
		380.9	9200	705	1400
		381	9100	705.5	1400
		381.1	9100	706	1300
		381.2	9100	706.5	1200
		381.3	9000	707	1100
		381.4	9000	707.5	1100
		381.5	9000	708	1000
		381.6	9000	708.5	900
		381.7	8900	709	900
		381.8	8900	709.5	800
		381.9	8900	710	800
		382	8900	710.5	700
		382.1	8800	711	700
		382.2	8800	711.5	600
		382.3	8800	712	600
		382.4	8800	712.5	600
		382.5	8700	713	500
		382.6	8700	713.5	500
		382.7	8700	714	500
		382.8	8700	714.5	400
		382.9	8600	715	400
		383	8600	715.5	400
		383.1	8600	716	300
		383.2	8600	716.5	300
		383.3	8500	717	300
		383.4	8500	717.5	300
		383.5	8500	718	300
		383.6	8500	718.5	200
		383.7	8400	719	200
		383.8	8400	719.5	200
		383.9	8400	720	200
		384	8400	720.5	200
		384.1	8300	721	200
		384.2	8300	721.5	200
		384.3	8300	722	200
		384.4	8300	722.5	200
		384.5	8300	723	200
		384.6	8200	723.5	200
		384.7	8200	724	200
		384.8	8200	724.5	200
		384.9	8200	725	200
		385	8100	725.5	200
		385.1	8100	726	100
		385.2	8100	726.5	100
		385.3	8100	727	100
		385.4	8100	727.5	100
		385.5	8000	728	100
		385.6	8000	728.5	100
		385.7	8000	729	100
		385.8	8000	729.5	100
		385.9	7900	730	100
		386	7900	730.5	100
		386.1	7900	731	100
		386.2	7900	731.5	100
		386.3	7900	732	100
		386.4	7800	732.5	100
		386.5	7800	733	100
		386.6	7800	733.5	100
		386.7	7800	734	100
		386.8	7800	734.5	100
		386.9	7700	735	100
		387	7700	735.5	100
		387.1	7700	736	0
		387.2	7700	736.5	0
		387.3	7700	737	0
		387.4	7600	737.5	0
		387.5	7600	738	0
		387.6	7600	738.5	0
		387.7	7600	739	0
		387.8	7600	739.5	0
		387.9	7600	740	0
		388	7500	740.5	0
		388.1	7500	741	0
		388.2	7500	741.5	0
		388.3	7500	742	0
		388.4	7500	742.5	0
		388.5	7400	743	0
		388.6	7400	743.5	0
		388.7	7400	744	0
		388.8	7400	744.5	0
		388.9	7400	745	0
		389	7400	745.5	0
		389.1	7300	746	0
		389.2	7300	746.5	0
		389.3	7300	747	0
		389.4	7300	747.5	0
		389.5	7300	748	0
		389.6	7300	748.5	0
		389.7	7300	749	0
		389.8	7200	749.5	0
		389.9	7200	750	0
		390	7200	750.5	0
		390.1	7200	751	0
		390.2	7200	751.5	0
		390.3	7200	752	0
		390.4	7100	752.5	0
		390.5	7100	753	0
		390.6	7100	753.5	0
		390.7	7100	754	0
		390.8	7100	754.5	0
		390.9	7000	755	0
		391	7000	755.5	0
		391.1	7000	756	0
		391.2	7000	756.5	0
		391.3	7000	757	0
		391.4	7000	757.5	0
		391.5	6900	758	0
		391.6	6900	758.5	0
		391.7	6900	759	0
		391.8	6900	759.5	0
		391.9	6900	760	0
		392	6800	760.5	0
		392.1	6800	761	0
		392.2	6800	761.5	0
		392.3	6800	762	0
		392.4	6800	762.5	0
		392.5	6700	763	0
		392.6	6700	763.5	0
		392.7	6700	764	0
		392.8	6700	764.5	0
		392.9	6700	765	0
		393	6600	765.5	0
		393.1	6600	766	0
		393.2	6600	766.5	0
		393.3	6600	767	0
		393.4	6600	767.5	0
		393.5	6500	768	0
		393.6	6500	768.5	0
		393.7	6500	769	0
		393.8	6500	769.5	0
		393.9	6500	770	0
		394	6400	770.5	0
		394.1	6400	771	0
		394.2	6400	771.5	0
		394.3	6400	772	0
		394.4	6300	772.5	0
		394.5	6300	773	0
		394.6	6300	773.5	0
		394.7	6300	774	0
		394.8	6300	774.5	0
		394.9	6200	775	0
		395	6200	775.5	0
		395.1	6200	776	0
		395.2	6200	776.5	0
		395.3	6100	777	0
		395.4	6100	777.5	0
		395.5	6100	778	0
		395.6	6100	778.5	0
		395.7	6000	779	0
		395.8	6000	779.5	0
		395.9	6000	780	0
		396	6000	780.5	0
		396.1	5900	781	0
		396.2	5900	781.5	0
		396.3	5900	782	0
		396.4	5900	782.5	0
		396.5	5800	783	0
		396.6	5800	783.5	0
		396.7	5800	784	0
		396.8	5800	784.5	0
		396.9	5700	785	0
		397	5700	785.5	0
		397.1	5700	786	0
		397.2	5700	786.5	0
		397.3	5600	787	0
		397.4	5600	787.5	0
		397.5	5600	788	0
		397.6	5600	788.5	0
		397.7	5500	789	0
		397.8	5500	789.5	0
		397.9	5500	790	0
		398	5500	790.5	0
		398.1	5400	791	0
		398.2	5400	791.5	0
		398.3	5400	792	0
		398.4	5300	792.5	0
		398.5	5300	793	0
		398.6	5300	793.5	0
		398.7	5300	794	0
		398.8	5200	794.5	0
		398.9	5200	795	0
		399	5200	795.5	0
		399.1	5200	796	0
		399.2	5100	796.5	0
		399.3	5100	797	0
		399.4	5100	797.5	0
		399.5	5100	798	0
		399.6	5000	798.5	0
		399.7	5000	799	0
		399.8	5000	799.5	0
		399.9	4900	800	0
		400	4900	800.5	0
		400.1	4900	801	0
		400.2	4900	801.5	0
		400.3	4800	802	0
		400.4	4800	802.5	0
		400.5	4800	803	0
		400.6	4800	803.5	0
		400.7	4700	804	0
		400.8	4700	804.5	0
		400.9	4700	805	0
		401	4700	805.5	0
		401.1	4600	806	0
		401.2	4600	806.5	0
		401.3	4600	807	0
		401.4	4600	807.5	0
		401.5	4600	808	0
		401.6	4500	808.5	0
		401.7	4500	809	0
		401.8	4500	809.5	0
		401.9	4500	810	0
		402	4400	810.5	0
		402.1	4400	811	0
		402.2	4400	811.5	0
		402.3	4400	812	0
		402.4	4300	812.5	0
		402.5	4300	813	0
		402.6	4300	813.5	0
		402.7	4300	814	0
		402.8	4300	814.5	0
		402.9	4200	815	0
		403	4200	815.5	0
		403.1	4200	816	0
		403.2	4200	816.5	0
		403.3	4100	817	0
		403.4	4100	817.5	0
		403.5	4100	818	0
		403.6	4100	818.5	0
		403.7	4100	819	0
		403.8	4000	819.5	0
		403.9	4000	820	0
		404	4000	820.5	0
		404.1	4000	821	0
		404.2	4000	821.5	0
		404.3	3900	822	0
		404.4	3900	822.5	0
		404.5	3900	823	0
		404.6	3900	823.5	0
		404.7	3900	824	0
		404.8	3800	824.5	0
		404.9	3800	825	0
		405	3800	825.5	0
		405.1	3800	826	0
		405.2	3800	826.5	0
		405.3	3700	827	0
		405.4	3700	827.5	0
		405.5	3700	828	0
		405.6	3700	828.5	0
		405.7	3700	829	0
		405.8	3700	829.5	0
		405.9	3600	830	0
		406	3600	830.5	0
		406.1	3600	831	100
		406.2	3600	831.5	100
		406.3	3600	832	100
		406.4	3600	832.5	100
		406.5	3500	833	100
		406.6	3500	833.5	100
		406.7	3500	834	100
		406.8	3500	834.5	100
		406.9	3500	835	100
		407	3500	835.5	100
		407.1	3400	836	100
		407.2	3400	836.5	100
		407.3	3400	837	100
		407.4	3400	837.5	100
		407.5	3400	838	100
		407.6	3400	838.5	100
		407.7	3400	839	100
		407.8	3400	839.5	100
		407.9	3300	840	100
		408	3300	840.5	100
		408.1	3300	841	100
		408.2	3300	841.5	100
		408.3	3300	842	100
		408.4	3300	842.5	100
		408.5	3300	843	100
		408.6	3200	843.5	100
		408.7	3200	844	100
		408.8	3200	844.5	100
		408.9	3200	845	100
		409	3200	845.5	100
		409.1	3200	846	100
		409.2	3200	846.5	100
		409.3	3200	847	100
		409.4	3200	847.5	100
		409.5	3100	848	100
		409.6	3100	848.5	100
		409.7	3100	849	100
		409.8	3100	849.5	100
		409.9	3100	850	100
		410	3100	850.5	100
		410.1	3100	851	100
		410.2	3100	851.5	100
		410.3	3000	852	100
		410.4	3000	852.5	100
		410.5	3000	853	100
		410.6	3000	853.5	100
		410.7	3000	854	100
		410.8	3000	854.5	100
		410.9	3000	855	100
		411	3000	855.5	100
		411.1	3000	856	100
		411.2	2900	856.5	100
		411.3	2900	857	100
		411.4	2900	857.5	100
		411.5	2900	858	100
		411.6	2900	858.5	100
		411.7	2900	859	100
		411.8	2900	859.5	100
		411.9	2900	860	100
		412	2900	860.5	100
		412.1	2800	861	100
		412.2	2800	861.5	100
		412.3	2800	862	100
		412.4	2800	862.5	100
		412.5	2800	863	100
		412.6	2800	863.5	100
		412.7	2800	864	100
		412.8	2800	864.5	100
		412.9	2800	865	100
		413	2700	865.5	100
		413.1	2700	866	100
		413.2	2700	866.5	100
		413.3	2700	867	100
		413.4	2700	867.5	100
		413.5	2700	868	100
		413.6	2700	868.5	100
		413.7	2700	869	100
		413.8	2700	869.5	100
		413.9	2700	870	100
		414	2700	870.5	100
		414.1	2600	871	100
		414.2	2600	871.5	100
		414.3	2600	872	100
		414.4	2600	872.5	100
		414.5	2600	873	100
		414.6	2600	873.5	100
		414.7	2600	874	100
		414.8	2600	874.5	100
		414.9	2600	875	100
		415	2600	875.5	100
		415.1	2600	876	100
		415.2	2600	876.5	100
		415.3	2600	877	100
		415.4	2600	877.5	100
		415.5	2600	878	100
		415.6	2600	878.5	100
		415.7	2500	879	100
		415.8	2500	879.5	100
		415.9	2500	880	100
		416	2500	880.5	100
		416.1	2500	881	100
		416.2	2500	881.5	100
		416.3	2500	882	100
		416.4	2500	882.5	100
		416.5	2500	883	100
		416.6	2500	883.5	100
		416.7	2500	884	100
		416.8	2500	884.5	100
		416.9	2500	885	100
		417	2500	885.5	100
		417.1	2500	886	100
		417.2	2500	886.5	100
		417.3	2500	887	100
		417.4	2500	887.5	100
		417.5	2500	888	100
		417.6	2400	888.5	100
		417.7	2400	889	100
		417.8	2400	889.5	100
		417.9	2400	890	100
		418	2400	890.5	100
		418.1	2400	891	0
		418.2	2400	891.5	0
		418.3	2400	892	0
		418.4	2400	892.5	0
		418.5	2400	893	0
		418.6	2400	893.5	0
		418.7	2400	894	0
		418.8	2400	894.5	0
		418.9	2400	895	0
		419	2400	895.5	0
		419.1	2400	896	0
		419.2	2400	896.5	0
		419.3	2400	897	0
		419.4	2400	897.5	0
		419.5	2400	898	0
		419.6	2400	898.5	0
		419.7	2400	899	0
		419.8	2400	899.5	0
		419.9	2300	900	0
		420	2300	900.5	0
		420.1	2300	901	0
		420.2	2300	901.5	0
		420.3	2300	902	0
		420.4	2300	902.5	0
		420.5	2300	903	0
		420.6	2300	903.5	0
		420.7	2300	904	0
		420.8	2300	904.5	0
		420.9	2300	905	0
		421	2300	905.5	0
		421.1	2300	906	0
		421.2	2300	906.5	0
		421.3	2300	907	0
		421.4	2300	907.5	0
		421.5	2300	908	0
		421.6	2300	908.5	0
		421.7	2300	909	0
		421.8	2300	909.5	0
		421.9	2300	910	0
		422	2300	910.5	0
		422.1	2300	911	0
		422.2	2300	911.5	0
		422.3	2300	912	0
		422.4	2300	912.5	0
		422.5	2300	913	0
		422.6	2300	913.5	0
		422.7	2300	914	0
		422.8	2300	914.5	0
		422.9	2400	915	0
		423	2400	915.5	0
		423.1	2400	916	0
		423.2	2400	916.5	0
		423.3	2400	917	0
		423.4	2400	917.5	0
		423.5	2400	918	0
		423.6	2400	918.5	0
		423.7	2400	919	0
		423.8	2400	919.5	0
		423.9	2400	920	0
		424	2400	920.5	0
		424.1	2400	921	0
		424.2	2400	921.5	0
		424.3	2400	922	0
		424.4	2400	922.5	0
		424.5	2400	923	0
		424.6	2400	923.5	0
		424.7	2400	924	0
		424.8	2400	924.5	0
		424.9	2400	925	0
		425	2400	925.5	0
		425.1	2400	926	0
		425.2	2400	926.5	0
		425.3	2400	927	0
		425.4	2400	927.5	0
		425.5	2400	928	0
		425.6	2400	928.5	0
		425.7	2400	929	0
		425.8	2400	929.5	0
		425.9	2400	930	0
		426	2400	930.5	0
		426.1	2400	931	0
		426.2	2400	931.5	0
		426.3	2400	932	0
		426.4	2400	932.5	0
		426.5	2400	933	0
		426.6	2400	933.5	0
		426.7	2400	934	0
		426.8	2400	934.5	0
		426.9	2400	935	0
		427	2400	935.5	0
		427.1	2400	936	0
		427.2	2400	936.5	0
		427.3	2500	937	0
		427.4	2500	937.5	0
		427.5	2500	938	0
		427.6	2500	938.5	0
		427.7	2500	939	0
		427.8	2500	939.5	0
		427.9	2500	940	0
		428	2500	940.5	0
		428.1	2500	941	0
		428.2	2500	941.5	0
		428.3	2500	942	0
		428.4	2500	942.5	0
		428.5	2500	943	0
		428.6	2500	943.5	0
		428.7	2500	944	0
		428.8	2500	944.5	0
		428.9	2500	945	0
		429	2500	945.5	0
		429.1	2500	946	0
		429.2	2500	946.5	0
		429.3	2500	947	0
		429.4	2500	947.5	0
		429.5	2500	948	0
		429.6	2500	948.5	0
		429.7	2600	949	0
		429.8	2600	949.5	0
		429.9	2600	950	0
		430	2600	950.5	0
		430.1	2600	951	0
		430.2	2600	951.5	0
		430.3	2600	952	0
		430.4	2600	952.5	0
		430.5	2600	953	0
		430.6	2600	953.5	0
		430.7	2600	954	0
		430.8	2600	954.5	0
		430.9	2600	955	0
		431	2600	955.5	0
		431.1	2600	956	0
		431.2	2600	956.5	0
		431.3	2600	957	0
		431.4	2600	957.5	0
		431.5	2600	958	0
		431.6	2600	958.5	0
		431.7	2600	959	0
		431.8	2600	959.5	0
		431.9	2600	960	0
		432	2600	960.5	0
		432.1	2600	961	0
		432.2	2600	961.5	0
		432.3	2600	962	0
		432.4	2600	962.5	0
		432.5	2700	963	0
		432.6	2700	963.5	0
		432.7	2700	964	0
		432.8	2700	964.5	0
		432.9	2700	965	0
		433	2700	965.5	0
		433.1	2700	966	0
		433.2	2700	966.5	0
		433.3	2700	967	0
		433.4	2700	967.5	0
		433.5	2700	968	0
		433.6	2700	968.5	0
		433.7	2700	969	0
		433.8	2700	969.5	0
		433.9	2700	970	0
		434	2700	970.5	0
		434.1	2700	971	0
		434.2	2700	971.5	0
		434.3	2700	972	0
		434.4	2700	972.5	0
		434.5	2700	973	0
		434.6	2700	973.5	0
		434.7	2700	974	0
		434.8	2700	974.5	0
		434.9	2700	975	0
		435	2700	975.5	0
		435.1	2700	976	0
		435.2	2700	976.5	0
		435.3	2700	977	0
		435.4	2700	977.5	0
		435.5	2700	978	0
		435.6	2700	978.5	0
		435.7	2700	979	0
		435.8	2800	979.5	0
		435.9	2800	980	0
		436	2800	980.5	0
		436.1	2800	981	0
		436.2	2800	981.5	0
		436.3	2800	982	0
		436.4	2800	982.5	0
		436.5	2800	983	0
		436.6	2800	983.5	0
		436.7	2800	984	0
		436.8	2800	984.5	0
		436.9	2800	985	0
		437	2800	985.5	0
		437.1	2800	986	0
		437.2	2800	986.5	0
		437.3	2800	987	0
		437.4	2800	987.5	0
		437.5	2800	988	0
		437.6	2800	988.5	0
		437.7	2800	989	0
		437.8	2800	989.5	0
		437.9	2800	990	0
		438	2800	990.5	0
		438.1	2800	991	0
		438.2	2800	991.5	0
		438.3	2900	992	0
		438.4	2900	992.5	0
		438.5	2900	993	0
		438.6	2900	993.5	0
		438.7	2900	994	0
		438.8	2900	994.5	0
		438.9	2900	995	0
		439	2900	995.5	0
		439.1	2900	996	0
		439.2	2900	996.5	0
		439.3	2900	997	0
		439.4	2900	997.5	0
		439.5	2900	998	0
		439.6	2900	998.5	0
		439.7	2900	999	0
		439.8	2900	999.5	0
		439.9	2900	1000	0
		440	2900		0
		440.1	2900
		440.2	2900
		440.3	2900
		440.4	2900
		440.5	2900
		440.6	2900
		440.7	2900
		440.8	3000
		440.9	3000
		441	3000
		441.1	3000
		441.2	3000
		441.3	3000
		441.4	3000
		441.5	3000
		441.6	3000
		441.7	3000
		441.8	3000
		441.9	3000
		442	3000
		442.1	3000
		442.2	3000
		442.3	3000
		442.4	3000
		442.5	3000
		442.6	3000
		442.7	3000
		442.8	3000
		442.9	3000
		443	3000
		443.1	3100
		443.2	3100
		443.3	3100
		443.4	3100
		443.5	3100
		443.6	3100
		443.7	3100
		443.8	3100
		443.9	3100
		444	3100
		444.1	3100
		444.2	3100
		444.3	3100
		444.4	3100
		444.5	3200
		444.6	3200
		444.7	3200
		444.8	3200
		444.9	3200
		445	3200
		445.1	3200
		445.2	3200
		445.3	3200
		445.4	3200
		445.5	3200
		445.6	3200
		445.7	3200
		445.8	3200
		445.9	3200
		446	3300
		446.1	3300
		446.2	3300
		446.3	3300
		446.4	3300
		446.5	3300
		446.6	3300
		446.7	3300
		446.8	3300
		446.9	3300
		447	3300
		447.1	3300
		447.2	3400
		447.3	3400
		447.4	3400
		447.5	3400
		447.6	3400
		447.7	3400
		447.8	3400
		447.9	3400
		448	3400
		448.1	3400
		448.2	3500
		448.3	3500
		448.4	3500
		448.5	3500
		448.6	3500
		448.7	3500
		448.8	3500
		448.9	3500
		449	3500
		449.1	3600
		449.2	3600
		449.3	3600
		449.4	3600
		449.5	3600
		449.6	3600
		449.7	3600
		449.8	3600
		449.9	3700
		450	3700
		450.1	3700
		450.2	3700
		450.3	3700
		450.4	3700
		450.5	3700
		450.6	3800
		450.7	3800
		450.8	3800
		450.9	3800
		451	3800
		451.1	3800
		451.2	3800
		451.3	3900
		451.4	3900
		451.5	3900
		451.6	3900
		451.7	3900
		451.8	3900
		451.9	3900
		452	3900
		452.1	4000
		452.2	4000
		452.3	4000
		452.4	4000
		452.5	4000
		452.6	4000
		452.7	4000
		452.8	4100
		452.9	4100
		453	4100
		453.1	4100
		453.2	4100
		453.3	4100
		453.4	4100
		453.5	4200
		453.6	4200
		453.7	4200
		453.8	4200
		453.9	4200
		454	4200
		454.1	4200
		454.2	4200
		454.3	4300
		454.4	4300
		454.5	4300
		454.6	4300
		454.7	4300
		454.8	4300
		454.9	4300
		455	4300
		455.1	4400
		455.2	4400
		455.3	4400
		455.4	4400
		455.5	4400
		455.6	4400
		455.7	4400
		455.8	4400
		455.9	4500
		456	4500
		456.1	4500
		456.2	4500
		456.3	4500
		456.4	4500
		456.5	4500
		456.6	4500
		456.7	4500
		456.8	4600
		456.9	4600
		457	4600
		457.1	4600
		457.2	4600
		457.3	4600
		457.4	4600
		457.5	4600
		457.6	4600
		457.7	4600
		457.8	4700
		457.9	4700
		458	4700
		458.1	4700
		458.2	4700
		458.3	4700
		458.4	4700
		458.5	4700
		458.6	4700
		458.7	4700
		458.8	4700
		458.9	4800
		459	4800
		459.1	4800
		459.2	4800
		459.3	4800
		459.4	4800
		459.5	4800
		459.6	4800
		459.7	4800
		459.8	4900
		459.9	4900
		460	4900
		460.1	4900
		460.2	4900
		460.3	4900
		460.4	4900
		460.5	4900
		460.6	4900
		460.7	5000
		460.8	5000
		460.9	5000
		461	5000
		461.1	5000
		461.2	5000
		461.3	5000
		461.4	5000
		461.5	5000
		461.6	5000
		461.7	5000
		461.8	5000
		461.9	5000
		462	5000
		462.1	5100
		462.2	5100
		462.3	5100
		462.4	5100
		462.5	5100
		462.6	5100
		462.7	5100
		462.8	5100
		462.9	5100
		463	5100
		463.1	5100
		463.2	5100
		463.3	5100
		463.4	5200
		463.5	5200
		463.6	5200
		463.7	5200
		463.8	5200
		463.9	5200
		464	5200
		464.1	5200
		464.2	5200
		464.3	5200
		464.4	5200
		464.5	5200
		464.6	5200
		464.7	5200
		464.8	5200
		464.9	5200
		465	5200
		465.1	5200
		465.2	5200
		465.3	5200
		465.4	5200
		465.5	5200
		465.6	5200
		465.7	5200
		465.8	5200
		465.9	5200
		466	5200
		466.1	5200
		466.2	5200
		466.3	5200
		466.4	5200
		466.5	5200
		466.6	5200
		466.7	5200
		466.8	5200
		466.9	5300
		467	5300
		467.1	5300
		467.2	5300
		467.3	5300
		467.4	5300
		467.5	5300
		467.6	5300
		467.7	5300
		467.8	5300
		467.9	5300
		468	5300
		468.1	5300
		468.2	5300
		468.3	5300
		468.4	5300
		468.5	5300
		468.6	5300
		468.7	5300
		468.8	5300
		468.9	5300
		469	5300
		469.1	5300
		469.2	5300
		469.3	5300
		469.4	5300
		469.5	5300
		469.6	5300
		469.7	5400
		469.8	5400
		469.9	5400
		470	5400
		470.1	5400
		470.2	5400
		470.3	5400
		470.4	5400
		470.5	5400
		470.6	5400
		470.7	5400
		470.8	5400
		470.9	5400
		471	5400
		471.1	5500
		471.2	5500
		471.3	5500
		471.4	5500
		471.5	5500
		471.6	5500
		471.7	5500
		471.8	5500
		471.9	5500
		472	5500
		472.1	5500
		472.2	5500
		472.3	5500
		472.4	5600
		472.5	5600
		472.6	5600
		472.7	5600
		472.8	5600
		472.9	5600
		473	5600
		473.1	5600
		473.2	5600
		473.3	5700
		473.4	5700
		473.5	5700
		473.6	5700
		473.7	5700
		473.8	5700
		473.9	5700
		474	5700
		474.1	5800
		474.2	5800
		474.3	5800
		474.4	5800
		474.5	5800
		474.6	5800
		474.7	5800
		474.8	5900
		474.9	5900
		475	5900
		475.1	5900
		475.2	5900
		475.3	5900
		475.4	6000
		475.5	6000
		475.6	6000
		475.7	6000
		475.8	6000
		475.9	6000
		476	6100
		476.1	6100
		476.2	6100
		476.3	6100
		476.4	6100
		476.5	6100
		476.6	6200
		476.7	6200
		476.8	6200
		476.9	6200
		477	6200
		477.1	6300
		477.2	6300
		477.3	6300
		477.4	6300
		477.5	6300
		477.6	6400
		477.7	6400
		477.8	6400
		477.9	6400
		478	6400
		478.1	6500
		478.2	6500
		478.3	6500
		478.4	6500
		478.5	6500
		478.6	6600
		478.7	6600
		478.8	6600
		478.9	6600
		479	6600
		479.1	6700
		479.2	6700
		479.3	6700
		479.4	6700
		479.5	6800
		479.6	6800
		479.7	6800
		479.8	6800
		479.9	6800
		480	6900
		480.1	6900
		480.2	6900
		480.3	6900
		480.4	6900
		480.5	7000
		480.6	7000
		480.7	7000
		480.8	7000
		480.9	7000
		481	7100
		481.1	7100
		481.2	7100
		481.3	7100
		481.4	7100
		481.5	7200
		481.6	7200
		481.7	7200
		481.8	7200
		481.9	7200
		482	7200
		482.1	7300
		482.2	7300
		482.3	7300
		482.4	7300
		482.5	7300
		482.6	7300
		482.7	7400
		482.8	7400
		482.9	7400
		483	7400
		483.1	7400
		483.2	7400
		483.3	7500
		483.4	7500
		483.5	7500
		483.6	7500
		483.7	7500
		483.8	7500
		483.9	7500
		484	7600
		484.1	7600
		484.2	7600
		484.3	7600
		484.4	7600
		484.5	7600
		484.6	7600
		484.7	7700
		484.8	7700
		484.9	7700
		485	7700
		485.1	7700
		485.2	7700
		485.3	7700
		485.4	7700
		485.5	7700
		485.6	7700
		485.7	7800
		485.8	7800
		485.9	7800
		486	7800
		486.1	7800
		486.2	7800
		486.3	7800
		486.4	7800
		486.5	7800
		486.6	7800
		486.7	7800
		486.8	7800
		486.9	7800
		487	7800
		487.1	7900
		487.2	7900
		487.3	7900
		487.4	7900
		487.5	7900
		487.6	7900
		487.7	7900
		487.8	7900
		487.9	7900
		488	7900
		488.1	7900
		488.2	7900
		488.3	7900
		488.4	7900
		488.5	7900
		488.6	7900
		488.7	7900
		488.8	7900
		488.9	7900
		489	7900
		489.1	7900
		489.2	7900
		489.3	7900
		489.4	7900
		489.5	7900
		489.6	7900
		489.7	7900
		489.8	7900
		489.9	7900
		490	7900
		490.1	7900
		490.2	7900
		490.3	7900
		490.4	8000
		490.5	8000
		490.6	8000
		490.7	8000
		490.8	8000
		490.9	8000
		491	7900
		491.1	7900
		491.2	7900
		491.3	7900
		491.4	7900
		491.5	7900
		491.6	7900
		491.7	7900
		491.8	7900
		491.9	7900
		492	7900
		492.1	7900
		492.2	7900
		492.3	7900
		492.4	7900
		492.5	7900
		492.6	7900
		492.7	7900
		492.8	7900
		492.9	7900
		493	7900
		493.1	7900
		493.2	7900
		493.3	7900
		493.4	7900
		493.5	7900
		493.6	7900
		493.7	7900
		493.8	7900
		493.9	7900
		494	7900
		494.1	7900
		494.2	7900
		494.3	7900
		494.4	7900
		494.5	7900
		494.6	7900
		494.7	7900
		494.8	7900
		494.9	7900
		495	7900
		495.1	7900
		495.2	7900
		495.3	7900
		495.4	7800
		495.5	7800
		495.6	7800
		495.7	7800
		495.8	7800
		495.9	7800
		496	7800
		496.1	7800
		496.2	7800
		496.3	7800
		496.4	7800
		496.5	7800
		496.6	7800
		496.7	7800
		496.8	7800
		496.9	7800
		497	7800
		497.1	7800
		497.2	7800
		497.3	7800
		497.4	7800
		497.5	7700
		497.6	7700
		497.7	7700
		497.8	7700
		497.9	7700
		498	7700
		498.1	7700
		498.2	7700
		498.3	7700
		498.4	7700
		498.5	7700
		498.6	7700
		498.7	7700
		498.8	7700
		498.9	7700
		499	7700
		499.1	7700
		499.2	7700
		499.3	7700
		499.4	7700
		499.5	7700
		499.6	7700
		499.7	7700
[truncated: 5,003 more rows]

## Sheet: Fig4b
Fluoresence Spectra (5)		Fluoresence Spectra (9)
Wavelength (nm)	Normalized Intensity	Wavelength (nm)	Normalized Intensity
661	0	540	9.26874e-06
662	0.000382955	541	0
663	0.000900829	542	5.9983e-05
664	0.00172	543	8.43987e-05
665	0.00225	544	5.91855e-05
666	0.00312	545	5.01178e-05
667	0.0037	546	0.000122786
668	0.00484	547	9.44185e-05
669	0.00606	548	0.000163877
670	0.00718	549	0.000150061
671	0.00814	550	0.000150975
672	0.01025	551	0.000100115
673	0.01181	552	0.000110796
674	0.01348	553	0.00013565
675	0.0158	554	0.000160155
676	0.01793	555	0.000184755
677	0.02142	556	0.000144782
678	0.02405	557	0.000151235
679	0.02707	558	0.000122626
680	0.03155	559	0.000190817
681	0.03479	560	0.000226807
682	0.03979	561	0.00021511
683	0.04517	562	0.000202873
684	0.05088	563	0.000239272
685	0.05697	564	0.000225073
686	0.06412	565	0.000219055
687	0.0712	566	0.000184584
688	0.07985	567	0.000315686
689	0.08911	568	0.000193728
690	0.09793	569	0.000322697
691	0.10884	570	0.000250202
692	0.12073	571	0.000266154
693	0.1335	572	0.000238613
694	0.14692	573	0.000327343
695	0.16241	574	0.000265744
696	0.17823	575	0.000259
697	0.19751	576	0.000321054
698	0.21653	577	0.000407166
699	0.23647	578	0.000431171
700	0.25918	579	0.000365623
701	0.28346	580	0.000382778
702	0.30936	581	0.000449609
703	0.33852	582	0.000476861
704	0.36693	583	0.00056575
705	0.40134	584	0.000622785
706	0.43524	585	0.000574435
707	0.4709	586	0.000587767
708	0.50597	587	0.000622013
709	0.54562	588	0.000742777
710	0.58382	589	0.000602529
711	0.62359	590	0.00073449
712	0.66336	591	0.000699131
713	0.70393	592	0.000891762
714	0.7469	593	0.000882788
715	0.78303	594	0.000940754
716	0.81709	595	0.00101
717	0.85033	596	0.00114
718	0.88517	597	0.00108
719	0.91399	598	0.0014
720	0.93634	599	0.00143
721	0.95901	600	0.00164
722	0.97883	601	0.00196
723	0.98851	602	0.00188
724	0.99707	603	0.00219
725	0.99924	604	0.00267
726	1	605	0.00286
727	0.99025	606	0.00331
728	0.98398	607	0.00372
729	0.96691	608	0.00403
730	0.95389	609	0.00494
731	0.9348	610	0.0056
732	0.90661	611	0.00645
733	0.88085	612	0.00748
734	0.86087	613	0.00839
735	0.83312	614	0.01009
736	0.80391	615	0.01118
737	0.77843	616	0.01322
738	0.74736	617	0.01484
739	0.72175	618	0.01702
740	0.6934	619	0.01952
741	0.66479	620	0.02233
742	0.64719	621	0.02553
743	0.61864	622	0.02887
744	0.59821	623	0.03328
745	0.57589	624	0.03759
746	0.55516	625	0.04255
747	0.5346	626	0.04758
748	0.51687	627	0.05338
749	0.50371	628	0.05934
750	0.48801	629	0.06715
751	0.46823	630	0.07367
752	0.46101	631	0.08263
753	0.44778	632	0.08964
754	0.43838	633	0.0987
755	0.42912	634	0.10596
756	0.42272	635	0.11778
757	0.41913	636	0.12612
758	0.41098	637	0.13609
759	0.4065	638	0.14572
760	0.40485	639	0.15487
761	0.40282	640	0.16572
762	0.40084	641	0.17438
763	0.39831	642	0.18338
764	0.40174	643	0.1926
765	0.40477	644	0.2002
766	0.40637	645	0.20832
767	0.41051	646	0.21711
768	0.41263	647	0.22493
769	0.41679	648	0.23629
770	0.42412	649	0.24584
771	0.43507	650	0.25787
772	0.43668	651	0.26927
773	0.44442	652	0.28187
774	0.45293	653	0.29685
775	0.46451	654	0.31066
776	0.46667	655	0.33087
777	0.4775	656	0.35008
778	0.48155	657	0.37274
779	0.49507	658	0.39234
780	0.50105	659	0.4191
781	0.50654	660	0.44952
782	0.51234	661	0.47569
783	0.5231	662	0.50594
784	0.52656	663	0.54287
785	0.53314	664	0.57211
786	0.53559	665	0.60656
787	0.54072	666	0.63675
788	0.54138	667	0.675
789	0.54139	668	0.70717
790	0.5457	669	0.73877
791	0.54301	670	0.77334
792	0.54631	671	0.79999
793	0.54412	672	0.8309
794	0.53899	673	0.85391
795	0.53453	674	0.87916
796	0.53609	675	0.90155
797	0.52792	676	0.92125
798	0.52332	677	0.94244
799	0.51947	678	0.94966
800	0.51309	679	0.9612
801	0.50589	680	0.97097
802	0.49676	681	0.97669
803	0.48362	682	0.98966
804	0.47599	683	0.99422
805	0.46755	684	0.99504
806	0.45583	685	0.99436
807	0.45187	686	0.99803
808	0.44053	687	0.99826
809	0.42686	688	1
810	0.41713	689	0.99936
811	0.40734	690	0.99086
812	0.39478	691	0.99184
813	0.38622	692	0.9775
814	0.37426	693	0.97004
815	0.36441	694	0.956
816	0.35274	695	0.95223
817	0.34439	696	0.93517
818	0.33326	697	0.91861
819	0.32473	698	0.91318
820	0.31109	699	0.89319
821	0.30057	700	0.87229
822	0.29145	701	0.86043
823	0.28373	702	0.84302
824	0.27295	703	0.82359
825	0.26474	704	0.80341
826	0.25704	705	0.78332
827	0.24956	706	0.7671
828	0.24007	707	0.74998
829	0.23149	708	0.73142
830	0.22658	709	0.71537
831	0.21684	710	0.69451
832	0.21142	711	0.67589
833	0.20648	712	0.66251
834	0.20011	713	0.64477
835	0.19326	714	0.631
836	0.18812	715	0.61795
837	0.18182	716	0.60746
838	0.18133	717	0.59752
839	0.17317	718	0.58644
840	0.1689	719	0.57513
841	0.1689	720	0.56643
842	0.16158	721	0.55734
843	0.159	722	0.54819
844	0.15693	723	0.54354
845	0.1524	724	0.53886
846	0.14882	725	0.53247
847	0.14471	726	0.52658
848	0.14325	727	0.52796
849	0.14147	728	0.51575
850	0.13838	729	0.51827
851	0.13808	730	0.50953
852	0.13503	731	0.5091
853	0.13522	732	0.50506
854	0.12961	733	0.49732
855	0.12724	734	0.49342
856	0.13124	735	0.49038
857	0.12876	736	0.48205
858	0.13005	737	0.48779
859	0.12601	738	0.47911
860	0.12769	739	0.47424
861	0.12626	740	0.46788
862	0.1209	741	0.46593
863	0.1229	742	0.4592
864	0.12463	743	0.45483
865	0.12006	744	0.4512
866	0.12288	745	0.44627
867	0.11986	746	0.44181
868	0.11804	747	0.43496
869	0.12201	748	0.43132
870	0.11982	749	0.42206
871	0.11739	750	0.4227
872	0.11858	751	0.41229
873	0.11463	752	0.40568
874	0.11654	753	0.39992
875	0.11779	754	0.39627
		755	0.3935
		756	0.38587
		757	0.3828
		758	0.37567
		759	0.36974
		760	0.36519
		761	0.35749
		762	0.35463
		763	0.34306
		764	0.33957
		765	0.33109
		766	0.32743
		767	0.31934
		768	0.3126
		769	0.30869
		770	0.30043
		771	0.29514
		772	0.28679
		773	0.28007
		774	0.27427
		775	0.26828
		776	0.26198
		777	0.25737
		778	0.24648
		779	0.24266
		780	0.23618
		781	0.22657
		782	0.22066
		783	0.21709
		784	0.2123
		785	0.20297
		786	0.19847
		787	0.19364
		788	0.18767
		789	0.18365
		790	0.18015
		791	0.17387
		792	0.16665
		793	0.16753
		794	0.15909
		795	0.1574
		796	0.15127
		797	0.14894
		798	0.14529
		799	0.14096
		800	0.13642
		801	0.13575
		802	0.13289
		803	0.12784
		804	0.12673
		805	0.12648
		806	0.1219
		807	0.11605
		808	0.11654
		809	0.11398
		810	0.11177
		811	0.10866
		812	0.10725
		813	0.10543
		814	0.10049
		815	0.10072
		816	0.10101
		817	0.09532
		818	0.0943
		819	0.09353
		820	0.09467
		821	0.0906
		822	0.09032
		823	0.08733
		824	0.0851
		825	0.08508
		826	0.08671
		827	0.08207
		828	0.08105
		829	0.08039
		830	0.07446
		831	0.07534
		832	0.07446
		833	0.07324
		834	0.07438
		835	0.07209
		836	0.07036
		837	0.07028
		838	0.07169
		839	0.06671
		840	0.06692
		841	0.06473
		842	0.06472
		843	0.06214
		844	0.06229
		845	0.06039
		846	0.05901
		847	0.05811
		848	0.05997
		849	0.05763
		850	0.05684
		851	0.05406
		852	0.05322
		853	0.05127
		854	0.0503
		855	0.05033
		856	0.05068
		857	0.05042
		858	0.05002
		859	0.04661
		860	0.04677
		861	0.04523
		862	0.04583
		863	0.04368
		864	0.04382
		865	0.04219
		866	0.04347
		867	0.04305
		868	0.04238
		869	0.04225
		870	0.04463
		871	0.03836
		872	0.04285
		873	0.04245
		874	0.03926
		875	0.03562

## Sheet: Fig4c
CV (5)		CV (9)		DPV (5)		DPV (9)
Potential (V)	Current (A)	Potential (V)	Current (A)	Potential (V)	Current (A)	Potential (V)	Current (A)
-0.6	3.70097e-06	-0.6	-4.4213e-06	0.996	-8.53931e-08	0.696	-8.2951e-06
-0.601	3.70107e-06	-0.601	-4.4209e-06	0.992	-1.07893e-07	0.692	-8.3331e-06
-0.602	3.70137e-06	-0.602	-4.4204e-06	0.988	-1.24693e-07	0.688	-8.3625e-06
-0.603	3.70157e-06	-0.603	-4.4203e-06	0.984	-1.36893e-07	0.684	-8.3871e-06
-0.604	3.70177e-06	-0.604	-4.4201e-06	0.98	-1.48093e-07	0.68	-8.4059e-06
-0.605	3.70207e-06	-0.605	-4.4197e-06	0.976	-1.57393e-07	0.676	-8.4226e-06
-0.606	3.70217e-06	-0.606	-4.4197e-06	0.972	-1.62393e-07	0.672	-8.436e-06
-0.607	3.70237e-06	-0.607	-4.4196e-06	0.968	-1.69793e-07	0.668	-8.4496e-06
-0.608	3.70257e-06	-0.608	-4.4194e-06	0.964	-1.76493e-07	0.664	-8.4613e-06
-0.609	3.70287e-06	-0.609	-4.419e-06	0.96	-1.82393e-07	0.66	-8.4716e-06
-0.61	3.70307e-06	-0.61	-4.4186e-06	0.956	-1.87193e-07	0.656	-8.4799e-06
-0.611	3.70337e-06	-0.611	-4.4183e-06	0.952	-1.92693e-07	0.652	-8.4906e-06
-0.612	3.70347e-06	-0.612	-4.4179e-06	0.948	-1.96193e-07	0.648	-8.4995e-06
-0.613	3.70357e-06	-0.613	-4.4179e-06	0.944	-1.99993e-07	0.644	-8.5073e-06
-0.614	3.70387e-06	-0.614	-4.4177e-06	0.94	-2.02093e-07	0.64	-8.514e-06
-0.615	3.70407e-06	-0.615	-4.4175e-06	0.936	-2.04193e-07	0.636	-8.5194e-06
-0.616	3.70417e-06	-0.616	-4.4174e-06	0.932	-2.05893e-07	0.632	-8.5248e-06
-0.617	3.70447e-06	-0.617	-4.4172e-06	0.928	-2.05993e-07	0.628	-8.5299e-06
-0.618	3.70477e-06	-0.618	-4.4167e-06	0.924	-2.04793e-07	0.624	-8.5359e-06
-0.619	3.70477e-06	-0.619	-4.4166e-06	0.92	-2.02993e-07	0.62	-8.5399e-06
-0.62	3.70507e-06	-0.62	-4.4162e-06	0.916	-2.00293e-07	0.616	-8.543e-06
-0.621	3.70537e-06	-0.621	-4.4158e-06	0.912	-1.96593e-07	0.612	-8.5458e-06
-0.622	3.70557e-06	-0.622	-4.4158e-06	0.908	-1.90393e-07	0.608	-8.548e-06
-0.623	3.70577e-06	-0.623	-4.4155e-06	0.904	-1.83193e-07	0.604	-8.551e-06
-0.624	3.70607e-06	-0.624	-4.4154e-06	0.9	-1.74893e-07	0.6	-8.5532e-06
-0.625	3.70617e-06	-0.625	-4.4153e-06	0.896	-1.63893e-07	0.596	-8.5548e-06
-0.626	3.70607e-06	-0.626	-4.4154e-06	0.892	-1.51193e-07	0.592	-8.5552e-06
-0.627	3.70637e-06	-0.627	-4.4151e-06	0.888	-1.35693e-07	0.588	-8.5551e-06
-0.628	3.70667e-06	-0.628	-4.4148e-06	0.884	-1.18793e-07	0.584	-8.5552e-06
-0.629	3.70677e-06	-0.629	-4.4145e-06	0.88	-9.92931e-08	0.58	-8.5551e-06
-0.63	3.70707e-06	-0.63	-4.4143e-06	0.876	-7.63931e-08	0.576	-8.5547e-06
-0.631	3.70737e-06	-0.631	-4.4141e-06	0.872	-5.10931e-08	0.572	-8.552e-06
-0.632	3.70737e-06	-0.632	-4.4141e-06	0.868	-2.28931e-08	0.568	-8.5487e-06
-0.633	3.70757e-06	-0.633	-4.4139e-06	0.864	9.0069e-09	0.564	-8.5441e-06
-0.634	3.70787e-06	-0.634	-4.4137e-06	0.86	4.43069e-08	0.56	-8.54e-06
-0.635	3.70807e-06	-0.635	-4.4136e-06	0.856	8.33069e-08	0.556	-8.5351e-06
-0.636	3.70837e-06	-0.636	-4.4133e-06	0.852	1.24707e-07	0.552	-8.5289e-06
-0.637	3.70867e-06	-0.637	-4.413e-06	0.848	1.69907e-07	0.548	-8.521e-06
-0.638	3.70887e-06	-0.638	-4.4127e-06	0.844	2.19607e-07	0.544	-8.511e-06
-0.639	3.70907e-06	-0.639	-4.4126e-06	0.84	2.71907e-07	0.54	-8.4998e-06
-0.64	3.70927e-06	-0.64	-4.4125e-06	0.836	3.27507e-07	0.536	-8.4875e-06
-0.641	3.70957e-06	-0.641	-4.4123e-06	0.832	3.86607e-07	0.532	-8.4736e-06
-0.642	3.70977e-06	-0.642	-4.4123e-06	0.828	4.48407e-07	0.528	-8.4572e-06
-0.643	3.71007e-06	-0.643	-4.4121e-06	0.824	5.13407e-07	0.524	-8.438e-06
-0.644	3.71027e-06	-0.644	-4.4118e-06	0.82	5.79407e-07	0.52	-8.4163e-06
-0.645	3.71047e-06	-0.645	-4.4117e-06	0.816	6.46407e-07	0.516	-8.392e-06
-0.646	3.71067e-06	-0.646	-4.4114e-06	0.812	7.15407e-07	0.512	-8.3653e-06
-0.647	3.71117e-06	-0.647	-4.4111e-06	0.808	7.85407e-07	0.508	-8.3362e-06
-0.648	3.71127e-06	-0.648	-4.411e-06	0.804	8.54407e-07	0.504	-8.303e-06
-0.649	3.71157e-06	-0.649	-4.411e-06	0.8	9.23407e-07	0.5	-8.2663e-06
-0.65	3.71187e-06	-0.65	-4.4107e-06	0.796	9.91407e-07	0.496	-8.2265e-06
-0.651	3.71177e-06	-0.651	-4.411e-06	0.792	1.05841e-06	0.492	-8.1828e-06
-0.652	3.71187e-06	-0.652	-4.411e-06	0.788	1.12341e-06	0.488	-8.1365e-06
-0.653	3.71227e-06	-0.653	-4.4108e-06	0.784	1.18541e-06	0.484	-8.088e-06
-0.654	3.71247e-06	-0.654	-4.4106e-06	0.78	1.24441e-06	0.48	-8.0347e-06
-0.655	3.71277e-06	-0.655	-4.4103e-06	0.776	1.30041e-06	0.476	-7.9779e-06
-0.656	3.71307e-06	-0.656	-4.4101e-06	0.772	1.35041e-06	0.472	-7.9186e-06
-0.657	3.71327e-06	-0.657	-4.4099e-06	0.768	1.39741e-06	0.468	-7.8576e-06
-0.658	3.71347e-06	-0.658	-4.41e-06	0.764	1.43941e-06	0.464	-7.7936e-06
-0.659	3.71387e-06	-0.659	-4.41e-06	0.76	1.47541e-06	0.46	-7.7286e-06
-0.66	3.71417e-06	-0.66	-4.4098e-06	0.756	1.50541e-06	0.456	-7.6616e-06
-0.661	3.71447e-06	-0.661	-4.4096e-06	0.752	1.53041e-06	0.452	-7.5936e-06
-0.662	3.71477e-06	-0.662	-4.4095e-06	0.748	1.55041e-06	0.448	-7.5256e-06
-0.663	3.71507e-06	-0.663	-4.4092e-06	0.744	1.56341e-06	0.444	-7.4586e-06
-0.664	3.71527e-06	-0.664	-4.4093e-06	0.74	1.56941e-06	0.44	-7.3926e-06
-0.665	3.71537e-06	-0.665	-4.4092e-06	0.736	1.56941e-06	0.436	-7.3286e-06
-0.666	3.71587e-06	-0.666	-4.4089e-06	0.732	1.56241e-06	0.432	-7.2666e-06
-0.667	3.71597e-06	-0.667	-4.4089e-06	0.728	1.54741e-06	0.428	-7.2076e-06
-0.668	3.71657e-06	-0.668	-4.4088e-06	0.724	1.52441e-06	0.424	-7.1536e-06
-0.669	3.71687e-06	-0.669	-4.4086e-06	0.72	1.49241e-06	0.42	-7.1046e-06
-0.67	3.71707e-06	-0.67	-4.4086e-06	0.716	1.45241e-06	0.416	-7.0606e-06
-0.671	3.71727e-06	-0.671	-4.4085e-06	0.712	1.40241e-06	0.412	-7.0226e-06
-0.672	3.71767e-06	-0.672	-4.4084e-06	0.708	1.34241e-06	0.408	-6.9896e-06
-0.673	3.71787e-06	-0.673	-4.4081e-06	0.704	1.27441e-06	0.404	-6.9656e-06
-0.674	3.71837e-06	-0.674	-4.4079e-06	0.7	1.19741e-06	0.4	-6.9486e-06
-0.675	3.71867e-06	-0.675	-4.4078e-06	0.696	1.11241e-06	0.396	-6.9406e-06
-0.676	3.71907e-06	-0.676	-4.4077e-06	0.692	1.01841e-06	0.392	-6.9416e-06
-0.677	3.71897e-06	-0.677	-4.4082e-06	0.688	9.19407e-07	0.388	-6.9506e-06
-0.678	3.71937e-06	-0.678	-4.408e-06	0.684	8.16407e-07	0.384	-6.9676e-06
-0.679	3.71957e-06	-0.679	-4.4079e-06	0.68	7.10407e-07	0.38	-6.9956e-06
-0.68	3.71987e-06	-0.68	-4.4078e-06	0.676	6.03407e-07	0.376	-7.0336e-06
-0.681	3.72027e-06	-0.681	-4.4077e-06	0.672	5.00407e-07	0.372	-7.0836e-06
-0.682	3.72077e-06	-0.682	-4.4075e-06	0.668	4.01807e-07	0.368	-7.1416e-06
-0.683	3.72087e-06	-0.683	-4.4075e-06	0.664	3.09507e-07	0.364	-7.2076e-06
-0.684	3.72127e-06	-0.684	-4.4076e-06	0.66	2.24007e-07	0.36	-7.2816e-06
-0.685	3.72167e-06	-0.685	-4.4074e-06	0.656	1.46507e-07	0.356	-7.3636e-06
-0.686	3.72197e-06	-0.686	-4.4073e-06	0.652	7.78069e-08	0.352	-7.4496e-06
-0.687	3.72247e-06	-0.687	-4.4073e-06	0.648	1.71069e-08	0.348	-7.5386e-06
-0.688	3.72267e-06	-0.688	-4.4072e-06	0.644	-3.57931e-08	0.344	-7.6286e-06
-0.689	3.72307e-06	-0.689	-4.4072e-06	0.64	-8.12931e-08	0.34	-7.7176e-06
-0.69	3.72337e-06	-0.69	-4.4072e-06	0.636	-1.20493e-07	0.336	-7.8046e-06
-0.691	3.72367e-06	-0.691	-4.407e-06	0.632	-1.53993e-07	0.332	-7.8866e-06
-0.692	3.72417e-06	-0.692	-4.4069e-06	0.628	-1.82593e-07	0.328	-7.9624e-06
-0.693	3.72427e-06	-0.693	-4.4068e-06	0.624	-2.07193e-07	0.324	-8.0303e-06
-0.694	3.72477e-06	-0.694	-4.4069e-06	0.62	-2.27393e-07	0.32	-8.0885e-06
-0.695	3.72527e-06	-0.695	-4.4068e-06	0.616	-2.45093e-07	0.316	-8.1382e-06
-0.696	3.72537e-06	-0.696	-4.407e-06	0.612	-2.60193e-07	0.312	-8.1792e-06
-0.697	3.72577e-06	-0.697	-4.4068e-06	0.608	-2.72993e-07	0.308	-8.2116e-06
-0.698	3.72637e-06	-0.698	-4.4067e-06	0.604	-2.84093e-07	0.304	-8.2345e-06
-0.699	3.72657e-06	-0.699	-4.4066e-06	0.6	-2.93893e-07	0.3	-8.2474e-06
-0.7	3.72707e-06	-0.7	-4.4066e-06	0.596	-3.02293e-07	0.296	-8.2518e-06
-0.701	3.72747e-06	-0.701	-4.4064e-06	0.592	-3.09793e-07	0.292	-8.2489e-06
-0.702	3.72767e-06	-0.702	-4.4066e-06	0.588	-3.16193e-07	0.288	-8.2374e-06
-0.703	3.72797e-06	-0.703	-4.4069e-06	0.584	-3.21793e-07	0.284	-8.2195e-06
-0.704	3.72817e-06	-0.704	-4.4068e-06	0.58	-3.26493e-07	0.28	-8.1942e-06
-0.705	3.72857e-06	-0.705	-4.4067e-06	0.576	-3.30293e-07	0.276	-8.1619e-06
-0.706	3.72907e-06	-0.706	-4.4068e-06	0.572	-3.32693e-07	0.272	-8.123e-06
-0.707	3.72937e-06	-0.707	-4.4068e-06	0.568	-3.34293e-07	0.268	-8.0789e-06
-0.708	3.72987e-06	-0.708	-4.4067e-06	0.564	-3.35193e-07	0.264	-8.0302e-06
-0.709	3.73017e-06	-0.709	-4.4067e-06	0.56	-3.35093e-07	0.26	-7.9762e-06
-0.71	3.73047e-06	-0.71	-4.4067e-06	0.556	-3.33093e-07	0.256	-7.9176e-06
-0.711	3.73097e-06	-0.711	-4.4065e-06	0.552	-3.30193e-07	0.252	-7.8536e-06
-0.712	3.73127e-06	-0.712	-4.4066e-06	0.548	-3.25793e-07	0.248	-7.7876e-06
-0.713	3.73167e-06	-0.713	-4.4068e-06	0.544	-3.19593e-07	0.244	-7.7206e-06
-0.714	3.73237e-06	-0.714	-4.4066e-06	0.54	-3.11893e-07	0.24	-7.6516e-06
-0.715	3.73247e-06	-0.715	-4.4067e-06	0.536	-3.02293e-07	0.236	-7.5806e-06
-0.716	3.73287e-06	-0.716	-4.4068e-06	0.532	-2.90593e-07	0.232	-7.5086e-06
-0.717	3.73337e-06	-0.717	-4.4066e-06	0.528	-2.77093e-07	0.228	-7.4366e-06
-0.718	3.73367e-06	-0.718	-4.4066e-06	0.524	-2.60393e-07	0.224	-7.3656e-06
-0.719	3.73417e-06	-0.719	-4.4065e-06	0.52	-2.41793e-07	0.22	-7.2976e-06
-0.72	3.73457e-06	-0.72	-4.4064e-06	0.516	-2.20393e-07	0.216	-7.2316e-06
-0.721	3.73497e-06	-0.721	-4.4066e-06	0.512	-1.95793e-07	0.212	-7.1676e-06
-0.722	3.73537e-06	-0.722	-4.4068e-06	0.508	-1.67693e-07	0.208	-7.1086e-06
-0.723	3.73567e-06	-0.723	-4.407e-06	0.504	-1.36193e-07	0.204	-7.0526e-06
-0.724	3.73627e-06	-0.724	-4.4068e-06	0.5	-1.01093e-07	0.2	-7.0046e-06
-0.725	3.73667e-06	-0.725	-4.4068e-06	0.496	-6.19931e-08	0.196	-6.9636e-06
-0.726	3.73707e-06	-0.726	-4.4068e-06	0.492	-1.85931e-08	0.192	-6.9276e-06
-0.727	3.73767e-06	-0.727	-4.4066e-06	0.488	2.87069e-08	0.188	-6.8996e-06
-0.728	3.73757e-06	-0.728	-4.407e-06	0.484	7.96069e-08	0.184	-6.8776e-06
-0.729	3.73797e-06	-0.729	-4.407e-06	0.48	1.35507e-07	0.18	-6.8656e-06
-0.73	3.73857e-06	-0.73	-4.407e-06	0.476	1.94907e-07	0.176	-6.8636e-06
-0.731	3.73887e-06	-0.731	-4.4072e-06	0.472	2.58207e-07	0.172	-6.8696e-06
-0.732	3.73927e-06	-0.732	-4.4073e-06	0.468	3.25107e-07	0.168	-6.8846e-06
-0.733	3.73977e-06	-0.733	-4.4073e-06	0.464	3.95107e-07	0.164	-6.9086e-06
-0.734	3.74017e-06	-0.734	-4.4073e-06	0.46	4.68407e-07	0.16	-6.9396e-06
-0.735	3.74067e-06	-0.735	-4.4073e-06	0.456	5.44407e-07	0.156	-6.9816e-06
-0.736	3.74117e-06	-0.736	-4.4073e-06	0.452	6.20407e-07	0.152	-7.0306e-06
-0.737	3.74157e-06	-0.737	-4.4072e-06	0.448	7.00407e-07	0.148	-7.0866e-06
-0.738	3.74207e-06	-0.738	-4.4074e-06	0.444	7.79407e-07	0.144	-7.1486e-06
-0.739	3.74257e-06	-0.739	-4.4075e-06	0.44	8.58407e-07	0.14	-7.2126e-06
-0.74	3.74307e-06	-0.74	-4.4075e-06	0.436	9.36407e-07	0.136	-7.2796e-06
-0.741	3.74337e-06	-0.741	-4.4079e-06	0.432	1.01241e-06	0.132	-7.3466e-06
-0.742	3.74377e-06	-0.742	-4.4079e-06	0.428	1.08541e-06	0.128	-7.4116e-06
-0.743	3.74447e-06	-0.743	-4.4077e-06	0.424	1.15541e-06	0.124	-7.4706e-06
-0.744	3.74467e-06	-0.744	-4.4079e-06	0.42	1.21941e-06	0.12	-7.5216e-06
-0.745	3.74527e-06	-0.745	-4.4078e-06	0.416	1.28041e-06	0.116	-7.5656e-06
-0.746	3.74587e-06	-0.746	-4.4078e-06	0.412	1.33541e-06	0.112	-7.5996e-06
-0.747	3.74617e-06	-0.747	-4.4082e-06	0.408	1.38441e-06	0.108	-7.6216e-06
-0.748	3.74657e-06	-0.748	-4.4083e-06	0.404	1.42641e-06	0.104	-7.6336e-06
-0.749	3.74717e-06	-0.749	-4.4084e-06	0.4	1.45941e-06	0.1	-7.6336e-06
-0.75	3.74757e-06	-0.75	-4.4085e-06	0.396	1.48541e-06	0.096	-7.6206e-06
-0.751	3.74817e-06	-0.751	-4.4086e-06	0.392	1.50241e-06	0.092	-7.5996e-06
-0.752	3.74857e-06	-0.752	-4.4085e-06	0.388	1.51141e-06	0.088	-7.5686e-06
-0.753	3.74897e-06	-0.753	-4.4086e-06	0.384	1.51141e-06	0.084	-7.5296e-06
-0.754	3.74907e-06	-0.754	-4.409e-06	0.38	1.50141e-06	0.08	-7.4816e-06
-0.755	3.74947e-06	-0.755	-4.409e-06	0.376	1.48341e-06	0.076	-7.4256e-06
-0.756	3.75007e-06	-0.756	-4.4092e-06	0.372	1.45441e-06	0.072	-7.3626e-06
-0.757	3.75047e-06	-0.757	-4.4095e-06	0.368	1.41441e-06	0.068	-7.2946e-06
-0.758	3.75087e-06	-0.758	-4.4095e-06	0.364	1.36641e-06	0.064	-7.2246e-06
-0.759	3.75147e-06	-0.759	-4.4097e-06	0.36	1.30541e-06	0.06	-7.1506e-06
-0.76	3.75177e-06	-0.76	-4.4099e-06	0.356	1.23441e-06	0.056	-7.0736e-06
-0.761	3.75207e-06	-0.761	-4.4099e-06	0.352	1.15341e-06	0.052	-6.9966e-06
-0.762	3.75277e-06	-0.762	-4.4099e-06	0.348	1.06241e-06	0.048	-6.9226e-06
-0.763	3.75297e-06	-0.763	-4.4101e-06	0.344	9.62407e-07	0.044	-6.8486e-06
-0.764	3.75347e-06	-0.764	-4.4101e-06	0.34	8.56407e-07	0.04	-6.7786e-06
-0.765	3.75407e-06	-0.765	-4.4103e-06	0.336	7.46407e-07	0.036	-6.7116e-06
-0.766	3.75437e-06	-0.766	-4.4106e-06	0.332	6.36407e-07	0.032	-6.6486e-06
-0.767	3.75467e-06	-0.767	-4.4108e-06	0.328	5.26407e-07	0.028	-6.5906e-06
-0.768	3.75517e-06	-0.768	-4.411e-06	0.324	4.21407e-07	0.024	-6.5406e-06
-0.769	3.75557e-06	-0.769	-4.4111e-06	0.32	3.21107e-07	0.02	-6.4996e-06
-0.77	3.75617e-06	-0.77	-4.4112e-06	0.316	2.28607e-07	0.016	-6.4646e-06
-0.771	3.75657e-06	-0.771	-4.4112e-06	0.312	1.45207e-07	0.012	-6.4356e-06
-0.772	3.75717e-06	-0.772	-4.4113e-06	0.308	6.97069e-08	0.008	-6.4156e-06
-0.773	3.75747e-06	-0.773	-4.4115e-06	0.304	2.1069e-09	0.004	-6.4056e-06
-0.774	3.75777e-06	-0.774	-4.4118e-06	0.3	-5.65931e-08	0	-6.4056e-06
-0.775	3.75847e-06	-0.775	-4.412e-06	0.296	-1.08893e-07	-0.004	-6.4156e-06
-0.776	3.75867e-06	-0.776	-4.4122e-06	0.292	-1.54993e-07	-0.008	-6.4346e-06
-0.777	3.75927e-06	-0.777	-4.4124e-06	0.288	-1.95293e-07	-0.012	-6.4636e-06
-0.778	3.75987e-06	-0.778	-4.4124e-06	0.284	-2.31793e-07	-0.016	-6.5046e-06
-0.779	3.75977e-06	-0.779	-4.4129e-06	0.28	-2.63993e-07	-0.02	-6.5566e-06
-0.78	3.76017e-06	-0.78	-4.4131e-06	0.276	-2.92693e-07	-0.024	-6.6206e-06
-0.781	3.76067e-06	-0.781	-4.4132e-06	0.272	-3.18593e-07	-0.028	-6.6966e-06
-0.782	3.76097e-06	-0.782	-4.4135e-06	0.268	-3.41093e-07	-0.032	-6.7826e-06
-0.783	3.76147e-06	-0.783	-4.4136e-06	0.264	-3.60793e-07	-0.036	-6.8776e-06
-0.784	3.76197e-06	-0.784	-4.414e-06	0.26	-3.77693e-07	-0.04	-6.9836e-06
-0.785	3.76237e-06	-0.785	-4.4145e-06	0.256	-3.91293e-07	-0.044	-7.0976e-06
-0.786	3.76267e-06	-0.786	-4.4147e-06	0.252	-4.02993e-07	-0.048	-7.2176e-06
-0.787	3.76327e-06	-0.787	-4.4148e-06	0.248	-4.12493e-07	-0.052	-7.3396e-06
-0.788	3.76377e-06	-0.788	-4.4149e-06	0.244	-4.20493e-07	-0.056	-7.4616e-06
-0.789	3.76417e-06	-0.789	-4.4149e-06	0.24	-4.27093e-07	-0.06	-7.5806e-06
-0.79	3.76457e-06	-0.79	-4.4151e-06	0.236	-4.31893e-07	-0.064	-7.6956e-06
-0.791	3.76517e-06	-0.791	-4.4153e-06	0.232	-4.35693e-07	-0.068	-7.8046e-06
-0.792	3.76527e-06	-0.792	-4.4157e-06	0.228	-4.38793e-07	-0.072	-7.9066e-06
-0.793	3.76577e-06	-0.793	-4.4161e-06	0.224	-4.40893e-07	-0.076	-7.9994e-06
-0.794	3.76637e-06	-0.794	-4.4162e-06	0.22	-4.42093e-07	-0.08	-8.0833e-06
-0.795	3.76667e-06	-0.795	-4.4165e-06	0.216	-4.42493e-07	-0.084	-8.1578e-06
-0.796	3.76707e-06	-0.796	-4.4167e-06	0.212	-4.42493e-07	-0.088	-8.2247e-06
-0.797	3.76757e-06	-0.797	-4.4168e-06	0.208	-4.41793e-07	-0.092	-8.2851e-06
-0.798	3.76777e-06	-0.798	-4.4171e-06	0.204	-4.39993e-07	-0.096	-8.3376e-06
-0.799	3.76827e-06	-0.799	-4.4173e-06	0.2	-4.37293e-07	-0.1	-8.3836e-06
-0.8	3.76867e-06	-0.8	-4.4175e-06	0.196	-4.34293e-07	-0.104	-8.4239e-06
-0.801	3.76917e-06	-0.801	-4.4179e-06	0.192	-4.30093e-07	-0.108	-8.4598e-06
-0.802	3.76967e-06	-0.802	-4.4182e-06	0.188	-4.25093e-07	-0.112	-8.4912e-06
-0.803	3.76997e-06	-0.803	-4.4185e-06	0.184	-4.18793e-07	-0.116	-8.5186e-06
-0.804	3.77047e-06	-0.804	-4.4187e-06	0.18	-4.11693e-07	-0.12	-8.5426e-06
-0.805	3.77007e-06	-0.805	-4.4195e-06	0.176	-4.03293e-07	-0.124	-8.5628e-06
-0.806	3.77067e-06	-0.806	-4.4197e-06	0.172	-3.93393e-07	-0.128	-8.5806e-06
-0.807	3.77117e-06	-0.807	-4.4198e-06	0.168	-3.81693e-07	-0.132	-8.5964e-06
-0.808	3.77137e-06	-0.808	-4.4201e-06	0.164	-3.68693e-07	-0.136	-8.61e-06
-0.809	3.77187e-06	-0.809	-4.4205e-06	0.16	-3.53293e-07	-0.14	-8.6221e-06
-0.81	3.77247e-06	-0.81	-4.4208e-06	0.156	-3.35893e-07	-0.144	-8.6331e-06
-0.811	3.77267e-06	-0.811	-4.4214e-06	0.152	-3.15993e-07	-0.148	-8.641e-06
-0.812	3.77297e-06	-0.812	-4.4216e-06	0.148	-2.93693e-07	-0.152	-8.6488e-06
-0.813	3.77347e-06	-0.813	-4.4218e-06	0.144	-2.68393e-07	-0.156	-8.6562e-06
-0.814	3.77387e-06	-0.814	-4.4222e-06	0.14	-2.39593e-07	-0.16	-8.6624e-06
-0.815	3.77437e-06	-0.815	-4.4223e-06	0.136	-2.07693e-07	-0.164	-8.6676e-06
-0.816	3.77467e-06	-0.816	-4.4227e-06	0.132	-1.72593e-07	-0.168	-8.6721e-06
-0.817	3.77497e-06	-0.817	-4.423e-06	0.128	-1.33693e-07	-0.172	-8.6763e-06
-0.818	3.77527e-06	-0.818	-4.4233e-06	0.124	-9.08931e-08	-0.176	-8.68e-06
-0.819	3.77567e-06	-0.819	-4.4238e-06	0.12	-4.41931e-08	-0.18	-8.6832e-06
-0.82	3.77617e-06	-0.82	-4.4241e-06	0.116	6.0069e-09	-0.184	-8.6862e-06
-0.821	3.77637e-06	-0.821	-4.4246e-06	0.112	6.04069e-08	-0.188	-8.6892e-06
-0.822	3.77687e-06	-0.822	-4.4248e-06	0.108	1.19707e-07	-0.192	-8.6913e-06
-0.823	3.77737e-06	-0.823	-4.425e-06	0.104	1.82007e-07	-0.196	-8.6933e-06
-0.824	3.77747e-06	-0.824	-4.4253e-06	0.1	2.47307e-07	-0.2	-8.6953e-06
-0.825	3.77787e-06	-0.825	-4.4256e-06	0.096	3.16207e-07	-0.204	-8.6972e-06
-0.826	3.77837e-06	-0.826	-4.4259e-06	0.092	3.88207e-07	-0.208	-8.699e-06
-0.827	3.77867e-06	-0.827	-4.4263e-06	0.088	4.62407e-07	-0.212	-8.7003e-06
-0.828	3.77907e-06	-0.828	-4.4267e-06	0.084	5.39407e-07	-0.216	-8.7013e-06
-0.829	3.77957e-06	-0.829	-4.4271e-06	0.08	6.17407e-07	-0.22	-8.703e-06
-0.83	3.77967e-06	-0.83	-4.4277e-06	0.076	6.96407e-07	-0.224	-8.7038e-06
-0.831	3.77987e-06	-0.831	-4.4282e-06	0.072	7.76407e-07	-0.228	-8.7053e-06
-0.832	3.78017e-06	-0.832	-4.4284e-06	0.068	8.54407e-07	-0.232	-8.7062e-06
-0.833	3.78047e-06	-0.833	-4.4286e-06	0.064	9.33407e-07	-0.236	-8.7071e-06
-0.834	3.78087e-06	-0.834	-4.429e-06	0.06	1.01041e-06	-0.24	-8.708e-06
-0.835	3.78117e-06	-0.835	-4.4295e-06	0.056	1.08641e-06	-0.244	-8.7088e-06
-0.836	3.78157e-06	-0.836	-4.4298e-06	0.052	1.15841e-06	-0.248	-8.7097e-06
-0.837	3.78177e-06	-0.837	-4.4304e-06	0.048	1.22841e-06	-0.252	-8.7106e-06
-0.838	3.78217e-06	-0.838	-4.4308e-06	0.044	1.29541e-06	-0.256	-8.711e-06
-0.839	3.78247e-06	-0.839	-4.4311e-06	0.04	1.35841e-06	-0.26	-8.7115e-06
-0.84	3.78277e-06	-0.84	-4.4315e-06	0.036	1.41641e-06	-0.264	-8.7121e-06
-0.841	3.78327e-06	-0.841	-4.4319e-06	0.032	1.46841e-06	-0.268	-8.7127e-06
-0.842	3.78367e-06	-0.842	-4.432e-06	0.028	1.51741e-06	-0.272	-8.7138e-06
-0.843	3.78377e-06	-0.843	-4.4327e-06	0.024	1.55941e-06	-0.276	-8.714e-06
-0.844	3.78397e-06	-0.844	-4.4331e-06	0.02	1.59541e-06	-0.28	-8.7144e-06
-0.845	3.78437e-06	-0.845	-4.4336e-06	0.016	1.62641e-06	-0.284	-8.7151e-06
-0.846	3.78467e-06	-0.846	-4.4341e-06	0.012	1.65141e-06	-0.288	-8.7153e-06
-0.847	3.78497e-06	-0.847	-4.4345e-06	0.008	1.66841e-06	-0.292	-8.7161e-06
-0.848	3.78537e-06	-0.848	-4.4349e-06	0.004	1.67941e-06	-0.296	-8.7166e-06
-0.849	3.78567e-06	-0.849	-4.4353e-06	0	1.68541e-06	-0.3	-8.7172e-06
-0.85	3.78587e-06	-0.85	-4.4357e-06	-0.004	1.68341e-06	-0.304	-8.7177e-06
-0.851	3.78617e-06	-0.851	-4.436e-06	-0.008	1.67541e-06	-0.308	-8.718e-06
-0.852	3.78657e-06	-0.852	-4.4364e-06	-0.012	1.65941e-06	-0.312	-8.7186e-06
-0.853	3.78697e-06	-0.853	-4.437e-06	-0.016	1.63441e-06	-0.316	-8.7193e-06
-0.854	3.78707e-06	-0.854	-4.4375e-06	-0.02	1.60341e-06	-0.32	-8.72e-06
-0.855	3.78747e-06	-0.855	-4.438e-06	-0.024	1.56241e-06	-0.324	-8.7204e-06
-0.856	3.78737e-06	-0.856	-4.4388e-06	-0.028	1.51141e-06	-0.328	-8.7207e-06
-0.857	3.78767e-06	-0.857	-4.4393e-06	-0.032	1.45241e-06	-0.332	-8.7214e-06
-0.858	3.78797e-06	-0.858	-4.4397e-06	-0.036	1.38341e-06	-0.336	-8.7222e-06
-0.859	3.78837e-06	-0.859	-4.4402e-06	-0.04	1.30441e-06	-0.34	-8.7227e-06
-0.86	3.78847e-06	-0.86	-4.4406e-06	-0.044	1.21441e-06	-0.344	-8.7232e-06
-0.861	3.78887e-06	-0.861	-4.4409e-06	-0.048	1.11541e-06	-0.348	-8.7242e-06
-0.862	3.78907e-06	-0.862	-4.4416e-06	-0.052	1.00841e-06	-0.352	-8.7241e-06
-0.863	3.78927e-06	-0.863	-4.4423e-06	-0.056	8.95407e-07	-0.356	-8.7245e-06
-0.864	3.78957e-06	-0.864	-4.4428e-06	-0.06	7.76407e-07	-0.36	-8.7253e-06
-0.865	3.78977e-06	-0.865	-4.4433e-06	-0.064	6.56407e-07	-0.364	-8.7262e-06
-0.866	3.79017e-06	-0.866	-4.4437e-06	-0.068	5.38407e-07	-0.368	-8.7264e-06
-0.867	3.79057e-06	-0.867	-4.4442e-06	-0.072	4.24407e-07	-0.372	-8.7269e-06
-0.868	3.79077e-06	-0.868	-4.4446e-06	-0.076	3.17207e-07	-0.376	-8.7274e-06
-0.869	3.79087e-06	-0.869	-4.4453e-06	-0.08	2.17607e-07	-0.38	-8.7283e-06
-0.87	3.79117e-06	-0.87	-4.4459e-06	-0.084	1.28007e-07	-0.384	-8.7289e-06
-0.871	3.79157e-06	-0.871	-4.4462e-06	-0.088	4.77069e-08	-0.388	-8.7295e-06
-0.872	3.79167e-06	-0.872	-4.4469e-06	-0.092	-2.45931e-08	-0.392	-8.7299e-06
-0.873	3.79197e-06	-0.873	-4.4475e-06	-0.096	-8.67931e-08	-0.396	-8.7307e-06
-0.874	3.79237e-06	-0.874	-4.4479e-06	-0.1	-1.40793e-07	-0.4	-8.7317e-06
-0.875	3.79247e-06	-0.875	-4.4486e-06	-0.104	-1.87493e-07	-0.404	-8.7323e-06
-0.876	3.79267e-06	-0.876	-4.4491e-06	-0.108	-2.27793e-07	-0.408	-8.7329e-06
-0.877	3.79297e-06	-0.877	-4.4495e-06	-0.112	-2.62693e-07	-0.412	-8.7334e-06
-0.878	3.79327e-06	-0.878	-4.4501e-06	-0.116	-2.92293e-07	-0.416	-8.7338e-06
-0.879	3.79357e-06	-0.879	-4.4506e-06	-0.12	-3.18093e-07	-0.42	-8.7346e-06
-0.88	3.79367e-06	-0.88	-4.4512e-06	-0.124	-3.40293e-07	-0.424	-8.7351e-06
-0.881	3.79377e-06	-0.881	-4.4519e-06	-0.128	-3.58793e-07	-0.428	-8.736e-06
-0.882	3.79377e-06	-0.882	-4.4528e-06	-0.132	-3.74693e-07	-0.432	-8.7366e-06
-0.883	3.79417e-06	-0.883	-4.4533e-06	-0.136	-3.88493e-07	-0.436	-8.7368e-06
-0.884	3.79427e-06	-0.884	-4.4538e-06	-0.14	-4.00393e-07	-0.44	-8.7373e-06
-0.885	3.79437e-06	-0.885	-4.4544e-06	-0.144	-4.10693e-07	-0.444	-8.7383e-06
-0.886	3.79467e-06	-0.886	-4.4549e-06	-0.148	-4.18793e-07	-0.448	-8.7389e-06
-0.887	3.79487e-06	-0.887	-4.4553e-06	-0.152	-4.26193e-07	-0.452	-8.7394e-06
-0.888	3.79507e-06	-0.888	-4.456e-06	-0.156	-4.32893e-07	-0.456	-8.7398e-06
-0.889	3.79527e-06	-0.889	-4.4567e-06	-0.16	-4.38193e-07	-0.46	-8.7405e-06
-0.89	3.79557e-06	-0.89	-4.4572e-06	-0.164	-4.42693e-07	-0.464	-8.7412e-06
-0.891	3.79577e-06	-0.891	-4.458e-06	-0.168	-4.46993e-07	-0.468	-8.7418e-06
-0.892	3.79587e-06	-0.892	-4.4585e-06	-0.172	-4.50493e-07	-0.472	-8.7423e-06
-0.893	3.79607e-06	-0.893	-4.459e-06	-0.176	-4.53693e-07	-0.476	-8.7431e-06
-0.894	3.79627e-06	-0.894	-4.4597e-06	-0.18	-4.56293e-07	-0.48	-8.7432e-06
-0.895	3.79637e-06	-0.895	-4.4602e-06	-0.184	-4.58593e-07	-0.484	-8.7439e-06
-0.896	3.79657e-06	-0.896	-4.4607e-06	-0.188	-4.60793e-07	-0.488	-8.7445e-06
-0.897	3.79677e-06	-0.897	-4.4614e-06	-0.192	-4.62493e-07	-0.492	-8.7452e-06
-0.898	3.79707e-06	-0.898	-4.4621e-06	-0.196	-4.64193e-07	-0.496	-8.7459e-06
-0.899	3.79707e-06	-0.899	-4.4629e-06	-0.2	-4.65593e-07	-0.5	-8.7462e-06
-0.9	3.79727e-06	-0.9	-4.4634e-06	-0.204	-4.67193e-07	-0.504	-8.7467e-06
-0.901	3.79737e-06	-0.901	-4.4643e-06	-0.208	-4.68293e-07	-0.508	-8.7473e-06
-0.902	3.79757e-06	-0.902	-4.4648e-06	-0.212	-4.69093e-07	-0.512	-8.748e-06
-0.903	3.79787e-06	-0.903	-4.4653e-06	-0.216	-4.69993e-07	-0.516	-8.7483e-06
-0.904	3.79787e-06	-0.904	-4.466e-06	-0.22	-4.71293e-07	-0.52	-8.7489e-06
-0.905	3.79797e-06	-0.905	-4.4665e-06	-0.224	-4.71793e-07	-0.524	-8.7494e-06
-0.906	3.79817e-06	-0.906	-4.467e-06	-0.228	-4.72693e-07	-0.528	-8.7503e-06
-0.907	3.79797e-06	-0.907	-4.4682e-06	-0.232	-4.72893e-07	-0.532	-8.7507e-06
-0.908	3.79797e-06	-0.908	-4.4691e-06	-0.236	-4.73693e-07	-0.536	-8.7511e-06
-0.909	3.79817e-06	-0.909	-4.4697e-06	-0.24	-4.74293e-07	-0.54	-8.752e-06
-0.91	3.79837e-06	-0.91	-4.4703e-06	-0.244	-4.74493e-07	-0.544	-8.7523e-06
-0.911	3.79847e-06	-0.911	-4.4709e-06	-0.248	-4.74993e-07	-0.548	-8.7525e-06
-0.912	3.79867e-06	-0.912	-4.4715e-06	-0.252	-4.75493e-07	-0.552	-8.7531e-06
-0.913	3.79867e-06	-0.913	-4.472e-06	-0.256	-4.75693e-07	-0.556	-8.7534e-06
-0.914	3.79877e-06	-0.914	-4.4728e-06	-0.26	-4.76093e-07	-0.56	-8.7539e-06
-0.915	3.79887e-06	-0.915	-4.4734e-06	-0.264	-4.76093e-07	-0.564	-8.7543e-06
-0.916	3.79897e-06	-0.916	-4.4739e-06	-0.268	-4.76593e-07	-0.568	-8.7548e-06
-0.917	3.79907e-06	-0.917	-4.4748e-06	-0.272	-4.76793e-07	-0.572	-8.7555e-06
-0.918	3.79917e-06	-0.918	-4.4755e-06	-0.276	-4.76793e-07	-0.576	-8.7558e-06
-0.919	3.79937e-06	-0.919	-4.476e-06	-0.28	-4.76793e-07	-0.58	-8.7563e-06
-0.92	3.79917e-06	-0.92	-4.4769e-06	-0.284	-4.76993e-07	-0.584	-8.7565e-06
-0.921	3.79927e-06	-0.921	-4.4773e-06	-0.288	-4.76893e-07	-0.588	-8.7569e-06
-0.922	3.79947e-06	-0.922	-4.4778e-06	-0.292	-4.76793e-07	-0.592	-8.7574e-06
-0.923	3.79947e-06	-0.923	-4.4786e-06	-0.296	-4.76593e-07	-0.596	-8.7578e-06
-0.924	3.79957e-06	-0.924	-4.4792e-06	-0.3	-4.76393e-07	-0.6	-8.7581e-06
-0.925	3.79967e-06	-0.925	-4.4798e-06	-0.304	-4.76293e-07	-0.604	-8.7593e-06
-0.926	3.79957e-06	-0.926	-4.4806e-06	-0.308	-4.76193e-07	-0.608	-8.759e-06
-0.927	3.79977e-06	-0.927	-4.4813e-06	-0.312	-4.75893e-07	-0.612	-8.7596e-06
-0.928	3.79987e-06	-0.928	-4.4819e-06	-0.316	-4.75693e-07	-0.616	-8.7596e-06
-0.929	3.79997e-06	-0.929	-4.4825e-06	-0.32	-4.75393e-07	-0.62	-8.7603e-06
-0.93	3.79997e-06	-0.93	-4.4831e-06	-0.324	-4.75293e-07	-0.624	-8.7606e-06
-0.931	3.79997e-06	-0.931	-4.4838e-06	-0.328	-4.74893e-07	-0.628	-8.761e-06
-0.932	3.79997e-06	-0.932	-4.4844e-06	-0.332	-4.74793e-07	-0.632	-8.7609e-06
-0.933	3.79957e-06	-0.933	-4.4855e-06	-0.336	-4.74693e-07	-0.636	-8.7614e-06
-0.934	3.79947e-06	-0.934	-4.4862e-06	-0.34	-4.74093e-07	-0.64	-8.7618e-06
-0.935	3.79977e-06	-0.935	-4.4868e-06	-0.344	-4.73693e-07	-0.644	-8.7619e-06
-0.936	3.79967e-06	-0.936	-4.4877e-06	-0.348	-4.73693e-07	-0.648	-8.7622e-06
-0.937	3.79967e-06	-0.937	-4.4883e-06	-0.352	-4.72993e-07	-0.652	-8.7623e-06
-0.938	3.79977e-06	-0.938	-4.4888e-06	-0.356	-4.72693e-07	-0.656	-8.7628e-06
-0.939	3.79957e-06	-0.939	-4.4897e-06	-0.36	-4.72393e-07	-0.66	-8.7625e-06
-0.94	3.79957e-06	-0.94	-4.4903e-06	-0.364	-4.72393e-07	-0.664	-8.7628e-06
-0.941	3.79967e-06	-0.941	-4.4909e-06	-0.368	-4.72193e-07	-0.668	-8.7634e-06
-0.942	3.79947e-06	-0.942	-4.4917e-06	-0.372	-4.71493e-07	-0.672	-8.7634e-06
-0.943	3.79957e-06	-0.943	-4.4924e-06	-0.376	-4.71393e-07	-0.676	-8.7634e-06
-0.944	3.79947e-06	-0.944	-4.4932e-06	-0.38	-4.71393e-07	-0.68	-8.7635e-06
-0.945	3.79937e-06	-0.945	-4.4938e-06	-0.384	-4.71093e-07	-0.684	-8.7638e-06
-0.946	3.79917e-06	-0.946	-4.4946e-06	-0.388	-4.70993e-07	-0.688	-8.7643e-06
-0.947	3.79917e-06	-0.947	-4.4951e-06	-0.392	-4.70693e-07	-0.692	-8.7642e-06
-0.948	3.79917e-06	-0.948	-4.4956e-06	-0.396	-4.70793e-07	-0.696	-8.7643e-06
-0.949	3.79907e-06	-0.949	-4.4964e-06	-0.4	-4.71193e-07	-0.7	-8.7646e-06
-0.95	3.79897e-06	-0.95	-4.497e-06	-0.404	-4.70693e-07	-0.704	-8.7648e-06
-0.951	3.79897e-06	-0.951	-4.4977e-06	-0.408	-4.70493e-07	-0.708	-8.7649e-06
-0.952	3.79877e-06	-0.952	-4.4986e-06	-0.412	-4.70793e-07	-0.712	-8.7653e-06
-0.953	3.79857e-06	-0.953	-4.4992e-06	-0.416	-4.70493e-07	-0.716	-8.7654e-06
-0.954	3.79857e-06	-0.954	-4.4999e-06	-0.42	-4.70393e-07	-0.72	-8.7656e-06
-0.955	3.79837e-06	-0.955	-4.5006e-06	-0.424	-4.70293e-07	-0.724	-8.7655e-06
-0.956	3.79837e-06	-0.956	-4.5011e-06	-0.428	-4.70493e-07	-0.728	-8.7657e-06
-0.957	3.79827e-06	-0.957	-4.5017e-06	-0.432	-4.70593e-07	-0.732	-8.7665e-06
-0.958	3.79787e-06	-0.958	-4.5026e-06	-0.436	-4.70293e-07	-0.736	-8.7662e-06
-0.959	3.79747e-06	-0.959	-4.5034e-06	-0.44	-4.70593e-07	-0.74	-8.7664e-06
-0.96	3.79737e-06	-0.96	-4.504e-06	-0.444	-4.70793e-07	-0.744	-8.7662e-06
-0.961	3.79717e-06	-0.961	-4.5048e-06	-0.448	-4.70893e-07	-0.748	-8.767e-06
-0.962	3.79707e-06	-0.962	-4.5055e-06	-0.452	-4.70793e-07	-0.752	-8.7671e-06
-0.963	3.79687e-06	-0.963	-4.5061e-06	-0.456	-4.70993e-07	-0.756	-8.7671e-06
-0.964	3.79667e-06	-0.964	-4.5067e-06	-0.46	-4.71093e-07	-0.76	-8.7672e-06
-0.965	3.79637e-06	-0.965	-4.5075e-06	-0.464	-4.71493e-07	-0.764	-8.7675e-06
-0.966	3.79607e-06	-0.966	-4.508e-06	-0.468	-4.70793e-07	-0.768	-8.7675e-06
-0.967	3.79587e-06	-0.967	-4.5085e-06	-0.472	-4.71593e-07	-0.772	-8.768e-06
-0.968	3.79557e-06	-0.968	-4.5093e-06	-0.476	-4.72093e-07	-0.776	-8.7683e-06
-0.969	3.79537e-06	-0.969	-4.51e-06	-0.48	-4.71893e-07	-0.78	-8.7686e-06
-0.97	3.79527e-06	-0.97	-4.5106e-06	-0.484	-4.72093e-07	-0.784	-8.7692e-06
-0.971	3.79487e-06	-0.971	-4.5115e-06	-0.488	-4.72393e-07	-0.788	-8.769e-06
-0.972	3.79447e-06	-0.972	-4.5122e-06	-0.492	-4.72593e-07	-0.792	-8.7692e-06
-0.973	3.79427e-06	-0.973	-4.5128e-06	-0.496	-4.72893e-07	-0.796	-8.7698e-06
-0.974	3.79387e-06	-0.974	-4.5134e-06	-0.5	-4.72993e-07	-0.8	-8.77e-06
-0.975	3.79357e-06	-0.975	-4.5139e-06	-0.504	-4.73293e-07	-0.804	-8.7701e-06
-0.976	3.79327e-06	-0.976	-4.5145e-06	-0.508	-4.73593e-07	-0.808	-8.7703e-06
-0.977	3.79287e-06	-0.977	-4.5152e-06	-0.512	-4.74093e-07	-0.812	-8.7708e-06
-0.978	3.79237e-06	-0.978	-4.5159e-06	-0.516	-4.74193e-07	-0.816	-8.7713e-06
-0.979	3.79187e-06	-0.979	-4.5167e-06	-0.52	-4.74693e-07	-0.82	-8.7716e-06
-0.98	3.79167e-06	-0.98	-4.5173e-06	-0.524	-4.74693e-07	-0.824	-8.7717e-06
-0.981	3.79127e-06	-0.981	-4.518e-06	-0.528	-4.75393e-07	-0.828	-8.7722e-06
-0.982	3.79087e-06	-0.982	-4.5185e-06	-0.532	-4.74993e-07	-0.832	-8.7725e-06
-0.983	3.79057e-06	-0.983	-4.5189e-06	-0.536	-4.75893e-07	-0.836	-8.7727e-06
-0.984	3.78967e-06	-0.984	-4.52e-06	-0.54	-4.76293e-07	-0.84	-8.7731e-06
-0.985	3.78907e-06	-0.985	-4.5207e-06	-0.544	-4.76293e-07	-0.844	-8.7736e-06
-0.986	3.78867e-06	-0.986	-4.5211e-06	-0.548	-4.76693e-07	-0.848	-8.7739e-06
-0.987	3.78817e-06	-0.987	-4.5219e-06	-0.552	-4.76893e-07	-0.852	-8.774e-06
-0.988	3.78747e-06	-0.988	-4.5224e-06	-0.556	-4.76993e-07	-0.856	-8.7743e-06
-0.989	3.78707e-06	-0.989	-4.523e-06	-0.56	-4.77393e-07	-0.86	-8.775e-06
-0.99	3.78647e-06	-0.99	-4.5238e-06	-0.564	-4.77593e-07	-0.864	-8.775e-06
-0.991	3.78587e-06	-0.991	-4.5243e-06	-0.568	-4.78193e-07	-0.868	-8.7754e-06
-0.992	3.78537e-06	-0.992	-4.5248e-06	-0.572	-4.78693e-07	-0.872	-8.7755e-06
-0.993	3.78467e-06	-0.993	-4.5253e-06	-0.576	-4.78893e-07	-0.876	-8.7759e-06
-0.994	3.78407e-06	-0.994	-4.5258e-06	-0.58	-4.79093e-07	-0.88	-8.7765e-06
-0.995	3.78327e-06	-0.995	-4.5263e-06	-0.584	-4.79593e-07	-0.884	-8.7765e-06
-0.996	3.78267e-06	-0.996	-4.5269e-06	-0.588	-4.79993e-07	-0.888	-8.7766e-06
-0.997	3.78177e-06	-0.997	-4.5277e-06	-0.592	-4.80693e-07	-0.892	-8.777e-06
-0.998	3.78097e-06	-0.998	-4.5282e-06	-0.596	-4.80893e-07	-0.896	-8.7773e-06
-0.999	3.78027e-06	-0.999	-4.5286e-06	-0.6	-4.81093e-07	-0.9	-8.7774e-06
-1	3.77947e-06	-1	-4.5292e-06	-0.604	-4.82493e-07	-0.904	-8.7775e-06
-1.001	3.77847e-06	-1.001	-4.5296e-06	-0.608	-4.82393e-07	-0.908	-8.7779e-06
-1.002	3.77777e-06	-1.002	-4.5299e-06	-0.612	-4.82893e-07	-0.912	-8.7785e-06
-1.003	3.77687e-06	-1.003	-4.5306e-06	-0.616	-4.83393e-07	-0.916	-8.7781e-06
-1.004	3.77587e-06	-1.004	-4.5311e-06	-0.62	-4.84093e-07	-0.92	-8.7782e-06
-1.005	3.77497e-06	-1.005	-4.5315e-06	-0.624	-4.84493e-07	-0.924	-8.7787e-06
-1.006	3.77387e-06	-1.006	-4.5321e-06	-0.628	-4.84993e-07	-0.928	-8.7787e-06
-1.007	3.77277e-06	-1.007	-4.5325e-06	-0.632	-4.85493e-07	-0.932	-8.7788e-06
-1.008	3.77177e-06	-1.008	-4.5329e-06	-0.636	-4.86093e-07	-0.936	-8.7789e-06
-1.009	3.77057e-06	-1.009	-4.5335e-06	-0.64	-4.86393e-07	-0.94	-8.779e-06
-1.01	3.76907e-06	-1.01	-4.5342e-06	-0.644	-4.86893e-07	-0.944	-8.7793e-06
-1.011	3.76777e-06	-1.011	-4.5347e-06	-0.648	-4.87593e-07	-0.948	-8.7794e-06
-1.012	3.76657e-06	-1.012	-4.5352e-06	-0.652	-4.88173e-07	-0.952	-8.7795e-06
-1.013	3.76527e-06	-1.013	-4.5358e-06	-0.656	-4.89103e-07	-0.956	-8.7797e-06
-1.014	3.76377e-06	-1.014	-4.5363e-06	-0.66	-4.89283e-07	-0.96	-8.7797e-06
-1.015	3.76257e-06	-1.015	-4.5367e-06	-0.664	-4.89673e-07	-0.964	-8.7795e-06
-1.016	3.76107e-06	-1.016	-4.5373e-06	-0.668	-4.90673e-07	-0.968	-8.7794e-06
-1.017	3.75957e-06	-1.017	-4.5377e-06	-0.672	-4.91303e-07	-0.972	-8.7798e-06
-1.018	3.75807e-06	-1.018	-4.538e-06	-0.676	-4.91683e-07	-0.976	-8.7801e-06
-1.019	3.75657e-06	-1.019	-4.5385e-06	-0.68	-4.92103e-07	-0.98	-8.7799e-06
-1.02	3.75497e-06	-1.02	-4.5388e-06	-0.684	-4.92943e-07	-0.984	-8.78e-06
-1.021	3.75347e-06	-1.021	-4.5392e-06	-0.688	-4.93633e-07	-0.988	-8.7805e-06
-1.022	3.75157e-06	-1.022	-4.5398e-06	-0.692	-4.94063e-07	-0.992	-8.7778e-06
-1.023	3.74977e-06	-1.023	-4.5403e-06	-0.696	-4.94573e-07	-0.996	-8.7803e-06
-1.024	3.74797e-06	-1.024	-4.5407e-06	-0.7	-4.95633e-07	-1	-8.7809e-06
-1.025	3.74607e-06	-1.025	-4.541e-06	-0.704	-4.96153e-07	-1.004	-8.7809e-06
-1.026	3.74407e-06	-1.026	-4.5414e-06	-0.708	-4.96613e-07	-1.008	-8.781e-06
-1.027	3.74207e-06	-1.027	-4.5418e-06	-0.712	-4.97263e-07	-1.012	-8.7811e-06
-1.028	3.74017e-06	-1.028	-4.5419e-06	-0.716	-4.98003e-07	-1.016	-8.7815e-06
-1.029	3.73777e-06	-1.029	-4.5423e-06	-0.72	-4.98823e-07	-1.02	-8.7819e-06
-1.03	3.73557e-06	-1.03	-4.5427e-06	-0.724	-4.99153e-07	-1.024	-8.7824e-06
-1.031	3.73347e-06	-1.031	-4.5428e-06	-0.728	-4.99943e-07	-1.028	-8.7825e-06
-1.032	3.73117e-06	-1.032	-4.5433e-06	-0.732	-5.00903e-07	-1.032	-8.7827e-06
-1.033	3.72887e-06	-1.033	-4.5437e-06	-0.736	-5.01263e-07	-1.036	-8.7832e-06
-1.034	3.72667e-06	-1.034	-4.5438e-06	-0.74	-5.01863e-07	-1.04	-8.7837e-06
-1.035	3.72387e-06	-1.035	-4.5444e-06	-0.744	-5.02613e-07	-1.044	-8.7836e-06
-1.036	3.72107e-06	-1.036	-4.5448e-06	-0.748	-5.03033e-07	-1.048	-8.7838e-06
-1.037	3.71847e-06	-1.037	-4.5449e-06	-0.752	-5.03983e-07	-1.052	-8.7843e-06
-1.038	3.71577e-06	-1.038	-4.5451e-06	-0.756	-5.04273e-07	-1.056	-8.7844e-06
-1.039	3.71307e-06	-1.039	-4.5455e-06	-0.76	-5.04943e-07	-1.06	-8.7844e-06
-1.04	3.71027e-06	-1.04	-4.5455e-06	-0.764	-5.05603e-07	-1.064	-8.7848e-06
-1.041	3.70747e-06	-1.041	-4.546e-06	-0.768	-5.06133e-07	-1.068	-8.7849e-06
-1.042	3.70447e-06	-1.042	-4.5463e-06	-0.772	-5.06593e-07	-1.072	-8.7853e-06
-1.043	3.70147e-06	-1.043	-4.5463e-06	-0.776	-5.07003e-07	-1.076	-8.7855e-06
-1.044	3.69847e-06	-1.044	-4.5465e-06	-0.78	-5.07553e-07	-1.08	-8.7854e-06
-1.045	3.69507e-06	-1.045	-4.5467e-06	-0.784	-5.08443e-07	-1.084	-8.7861e-06
-1.046	3.69177e-06	-1.046	-4.5466e-06	-0.788	-5.08703e-07	-1.088	-8.786e-06
-1.047	3.68857e-06	-1.047	-4.5467e-06	-0.792	-5.08513e-07	-1.092	-8.7859e-06
-1.048	3.68477e-06	-1.048	-4.547e-06	-0.796	-5.09053e-07	-1.096	-8.786e-06
-1.049	3.68147e-06	-1.049	-4.5472e-06	-0.8	-5.09053e-07	-1.1	-8.7861e-06
-1.05	3.67797e-06	-1.05	-4.5473e-06	-0.804	-5.09223e-07	-1.104	-8.7864e-06
-1.051	3.67427e-06	-1.051	-4.5475e-06	-0.808	-5.09323e-07	-1.108	-8.7863e-06
-1.052	3.67057e-06	-1.052	-4.5475e-06	-0.812	-5.09653e-07	-1.112	-8.7863e-06
-1.053	3.66667e-06	-1.053	-4.5475e-06	-0.816	-5.08773e-07	-1.116	-8.7866e-06
-1.054	3.66267e-06	-1.054	-4.5476e-06	-0.82	-5.09493e-07	-1.12	-8.7862e-06
-1.055	3.65877e-06	-1.055	-4.5476e-06	-0.824	-5.09483e-07	-1.124	-8.7862e-06
-1.056	3.65477e-06	-1.056	-4.5476e-06	-0.828	-5.09443e-07	-1.128	-8.7862e-06
-1.057	3.65077e-06	-1.057	-4.5476e-06	-0.832	-5.09163e-07	-1.132	-8.7861e-06
-1.058	3.64637e-06	-1.058	-4.5476e-06	-0.836	-5.09023e-07	-1.136	-8.7865e-06
-1.059	3.64207e-06	-1.059	-4.5477e-06	-0.84	-5.08633e-07	-1.14	-8.786e-06
-1.06	3.63757e-06	-1.06	-4.5476e-06	-0.844	-5.08463e-07	-1.144	-8.7859e-06
-1.061	3.63267e-06	-1.061	-4.5481e-06	-0.848	-5.07983e-07	-1.148	-8.7858e-06
-1.062	3.62817e-06	-1.062	-4.5482e-06	-0.852	-5.07373e-07	-1.152	-8.7857e-06
-1.063	3.62357e-06	-1.063	-4.5478e-06	-0.856	-5.06923e-07	-1.156	-8.7856e-06
-1.064	3.61867e-06	-1.064	-4.5478e-06	-0.86	-5.06653e-07	-1.16	-8.7855e-06
-1.065	3.61387e-06	-1.065	-4.5475e-06	-0.864	-5.05593e-07	-1.164	-8.7854e-06
-1.066	3.60907e-06	-1.066	-4.5474e-06	-0.868	-5.05053e-07	-1.168	-8.7855e-06
-1.067	3.60427e-06	-1.067	-4.5475e-06	-0.872	-5.04243e-07	-1.172	-8.7846e-06
-1.068	3.59917e-06	-1.068	-4.5475e-06	-0.876	-5.03463e-07	-1.176	-8.7844e-06
-1.069	3.59407e-06	-1.069	-4.5472e-06	-0.88	-5.02503e-07	-1.18	-8.7844e-06
-1.07	3.58877e-06	-1.07	-4.5472e-06	-0.884	-5.01353e-07	-1.184	-8.784e-06
-1.071	3.58347e-06	-1.071	-4.5469e-06	-0.888	-5.00113e-07	-1.188	-8.7836e-06
-1.072	3.57837e-06	-1.072	-4.5466e-06	-0.892	-4.99143e-07	-1.192	-8.7835e-06
-1.073	3.57317e-06	-1.073	-4.5464e-06	-0.896	-4.97683e-07	-1.196	-8.7834e-06
-1.074	3.56747e-06	-1.074	-4.5463e-06	-0.9	-4.96023e-07	-1.2	-8.7831e-06
-1.075	3.56197e-06	-1.075	-4.5462e-06	-0.904	-4.94323e-07	-1.204	-8.7829e-06
-1.076	3.55637e-06	-1.076	-4.546e-06	-0.908	-4.92553e-07	-1.208	-8.7823e-06
-1.077	3.55067e-06	-1.077	-4.5458e-06	-0.912	-4.90713e-07	-1.212	-8.7821e-06
-1.078	3.54477e-06	-1.078	-4.5455e-06	-0.916	-4.87943e-07	-1.216	-8.7816e-06
-1.079	3.53897e-06	-1.079	-4.5452e-06	-0.92	-4.85493e-07	-1.22	-8.7815e-06
-1.08	3.53297e-06	-1.08	-4.545e-06	-0.924	-4.82593e-07	-1.224	-8.7809e-06
-1.081	3.52707e-06	-1.081	-4.5445e-06	-0.928	-4.78993e-07	-1.228	-8.7807e-06
-1.082	3.52107e-06	-1.082	-4.5441e-06	-0.932	-4.75293e-07	-1.232	-8.7804e-06
-1.083	3.51497e-06	-1.083	-4.5439e-06	-0.936	-4.70793e-07	-1.236	-8.7798e-06
-1.084	3.50887e-06	-1.084	-4.5435e-06	-0.94	-4.66193e-07	-1.24	-8.7793e-06
-1.085	3.50297e-06	-1.085	-4.5432e-06	-0.944	-4.60393e-07	-1.244	-8.7794e-06
-1.086	3.49657e-06	-1.086	-4.5431e-06	-0.948	-4.53993e-07	-1.248	-8.7788e-06
-1.087	3.49017e-06	-1.087	-4.543e-06	-0.952	-4.46893e-07	-1.252	-8.7782e-06
-1.088	3.48377e-06	-1.088	-4.5424e-06	-0.956	-4.38693e-07	-1.256	-8.7776e-06
-1.089	3.47787e-06	-1.089	-4.5419e-06	-0.96	-4.29393e-07	-1.26	-8.7774e-06
-1.09	3.47157e-06	-1.09	-4.5415e-06	-0.964	-4.18593e-07	-1.264	-8.7769e-06
-1.091	3.46507e-06	-1.091	-4.541e-06	-0.968	-4.06593e-07	-1.268	-8.7764e-06
-1.092	3.45867e-06	-1.092	-4.5406e-06	-0.972	-3.93293e-07	-1.272	-8.7759e-06
-1.093	3.45207e-06	-1.093	-4.5403e-06	-0.976	-3.78393e-07	-1.276	-8.7755e-06
-1.094	3.44547e-06	-1.094	-4.5399e-06	-0.98	-3.61193e-07	-1.28	-8.7749e-06
-1.095	3.43897e-06	-1.095	-4.5394e-06	-0.984	-3.42593e-07	-1.284	-8.7741e-06
-1.096	3.43237e-06	-1.096	-4.5389e-06	-0.988	-3.22293e-07	-1.288	-8.7735e-06
-1.097	3.42587e-06	-1.097	-4.5383e-06	-0.992	-2.99093e-07	-1.292	-8.7731e-06
-1.098	3.41937e-06	-1.098	-4.5376e-06	-0.996	-2.74393e-07	-1.296	-8.7726e-06
-1.099	3.41247e-06	-1.099	-4.5371e-06	-1	-2.47193e-07	-1.3	-8.7713e-06
-1.1	3.40587e-06	-1.1	-4.5366e-06	-1.004	-2.18093e-07	-1.304	-8.7705e-06
-1.101	3.39917e-06	-1.101	-4.536e-06	-1.008	-1.86593e-07	-1.308	-8.77e-06
-1.102	3.39247e-06	-1.102	-4.5356e-06	-1.012	-1.52793e-07	-1.312	-8.7689e-06
-1.103	3.38587e-06	-1.103	-4.535e-06	-1.016	-1.17593e-07	-1.316	-8.7679e-06
-1.104	3.37897e-06	-1.104	-4.5345e-06	-1.02	-8.04931e-08	-1.32	-8.7664e-06
-1.105	3.37197e-06	-1.105	-4.5338e-06	-1.024	-4.12931e-08	-1.324	-8.7652e-06
-1.106	3.36497e-06	-1.106	-4.5331e-06	-1.028	-5.93096e-10	-1.328	-8.764e-06
-1.107	3.35827e-06	-1.107	-4.5325e-06	-1.032	4.13069e-08	-1.332	-8.7625e-06
-1.108	3.35187e-06	-1.108	-4.5316e-06	-1.036	8.38069e-08	-1.336	-8.7608e-06
-1.109	3.34477e-06	-1.109	-4.5311e-06	-1.04	1.27407e-07	-1.34	-8.7594e-06
-1.11	3.33807e-06	-1.11	-4.5304e-06	-1.044	1.71807e-07	-1.344	-8.7573e-06
-1.111	3.33167e-06	-1.111	-4.5297e-06	-1.048	2.15507e-07	-1.348	-8.7553e-06
-1.112	3.32457e-06	-1.112	-4.5298e-06	-1.052	2.58007e-07	-1.352	-8.7528e-06
-1.113	3.31777e-06	-1.113	-4.5291e-06	-1.056	3.00007e-07	-1.356	-8.7507e-06
-1.114	3.31137e-06	-1.114	-4.5283e-06	-1.06	3.40707e-07	-1.36	-8.7485e-06
-1.115	3.30467e-06	-1.115	-4.5275e-06	-1.064	3.79907e-07	-1.364	-8.7454e-06
-1.116	3.29817e-06	-1.116	-4.5266e-06	-1.068	4.17407e-07	-1.368	-8.7424e-06
-1.117	3.29177e-06	-1.117	-4.5259e-06	-1.072	4.51407e-07	-1.372	-8.7395e-06
-1.118	3.28537e-06	-1.118	-4.5253e-06	-1.076	4.83407e-07	-1.376	-8.7357e-06
-1.119	3.27867e-06	-1.119	-4.5246e-06	-1.08	5.13407e-07	-1.38	-8.7318e-06
-1.12	3.27217e-06	-1.12	-4.524e-06	-1.084	5.40407e-07	-1.384	-8.7277e-06
-1.121	3.26587e-06	-1.121	-4.5231e-06	-1.088	5.64407e-07	-1.388	-8.7233e-06
-1.122	3.25937e-06	-1.122	-4.5222e-06	-1.092	5.85407e-07	-1.392	-8.7184e-06
-1.123	3.25297e-06	-1.123	-4.5213e-06	-1.096	6.04407e-07	-1.396	-8.7128e-06
-1.124	3.24687e-06	-1.124	-4.5204e-06	-1.1	6.19407e-07	-1.4	-8.7069e-06
-1.125	3.24037e-06	-1.125	-4.5195e-06	-1.104	6.33407e-07	-1.404	-8.7003e-06
-1.126	3.23397e-06	-1.126	-4.5187e-06	-1.108	6.45407e-07	-1.408	-8.6927e-06
-1.127	3.22777e-06	-1.127	-4.5177e-06	-1.112	6.54407e-07	-1.412	-8.6844e-06
-1.128	3.22167e-06	-1.128	-4.5171e-06	-1.116	6.61407e-07	-1.416	-8.6748e-06
-1.129	3.21557e-06	-1.129	-4.5163e-06	-1.12	6.69407e-07	-1.42	-8.6642e-06
-1.13	3.20947e-06	-1.13	-4.5153e-06	-1.124	6.75407e-07	-1.424	-8.6526e-06
-1.131	3.20337e-06	-1.131	-4.5144e-06	-1.128	6.82407e-07	-1.428	-8.6383e-06
-1.132	3.19727e-06	-1.132	-4.5134e-06	-1.132	6.88407e-07	-1.432	-8.6226e-06
-1.133	3.19147e-06	-1.133	-4.5124e-06	-1.136	6.96407e-07	-1.436	-8.6049e-06
-1.134	3.18567e-06	-1.134	-4.5114e-06	-1.14	7.05407e-07	-1.44	-8.5846e-06
-1.135	3.17997e-06	-1.135	-4.5104e-06	-1.144	7.15407e-07	-1.444	-8.5618e-06
-1.136	3.17427e-06	-1.136	-4.5095e-06	-1.148	7.27407e-07	-1.448	-8.5363e-06
-1.137	3.16867e-06	-1.137	-4.5087e-06	-1.152	7.41407e-07	-1.452	-8.5082e-06
-1.138	3.16267e-06	-1.138	-4.5082e-06	-1.156	7.58407e-07	-1.456	-8.4763e-06
-1.139	3.15677e-06	-1.139	-4.5071e-06	-1.16	7.76407e-07	-1.46	-8.4409e-06
-1.14	3.15077e-06	-1.14	-4.5061e-06	-1.164	7.97407e-07	-1.464	-8.4022e-06
-1.141	3.14477e-06	-1.141	-4.5052e-06	-1.168	8.18407e-07	-1.468	-8.3597e-06
-1.142	3.13977e-06	-1.142	-4.5041e-06	-1.172	8.43407e-07	-1.472	-8.3125e-06
-1.143	3.13377e-06	-1.143	-4.503e-06	-1.176	8.69407e-07	-1.476	-8.2617e-06
-1.144	3.12877e-06	-1.144	-4.5022e-06	-1.18	8.96407e-07	-1.48	-8.2071e-06
-1.145	3.12277e-06	-1.145	-4.5012e-06	-1.184	9.24407e-07	-1.484	-8.1498e-06
-1.146	3.11777e-06	-1.146	-4.5002e-06	-1.188	9.53407e-07	-1.488	-8.0891e-06
-1.147	3.11177e-06	-1.147	-4.4992e-06	-1.192	9.82407e-07	-1.492	-8.024e-06
-1.148	3.10677e-06	-1.148	-4.4981e-06	-1.196	1.01041e-06	-1.496	-7.9566e-06
-1.149	3.10077e-06	-1.149	-4.4971e-06	-1.2	1.03741e-06	-1.5	-7.8876e-06
-1.15	3.09577e-06	-1.15	-4.4959e-06	-1.204	1.06541e-06	-1.504	-7.8146e-06
-1.151	3.09077e-06	-1.151	-4.495e-06	-1.208	1.09041e-06	-1.508	-7.7396e-06
-1.152	3.08477e-06	-1.152	-4.494e-06	-1.212	1.11341e-06	-1.512	-7.6646e-06
-1.153	3.07977e-06	-1.153	-4.4927e-06	-1.216	1.13541e-06	-1.516	-7.5876e-06
-1.154	3.07477e-06	-1.154	-4.4918e-06	-1.22	1.15541e-06	-1.52	-7.5116e-06
-1.155	3.06977e-06	-1.155	-4.4907e-06	-1.224	1.17441e-06	-1.524	-7.4356e-06
-1.156	3.06477e-06	-1.156	-4.4897e-06	-1.228	1.19041e-06	-1.528	-7.3626e-06
-1.157	3.05877e-06	-1.157	-4.4887e-06	-1.232	1.20541e-06	-1.532	-7.2906e-06
-1.158	3.05377e-06	-1.158	-4.4876e-06	-1.236	1.21941e-06	-1.536	-7.2196e-06
-1.159	3.04877e-06	-1.159	-4.4861e-06	-1.24	1.23141e-06	-1.54	-7.1526e-06
-1.16	3.04377e-06	-1.16	-4.4851e-06	-1.244	1.24341e-06	-1.544	-7.0916e-06
-1.161	3.03777e-06	-1.161	-4.4841e-06	-1.248	1.25441e-06	-1.548	-7.0336e-06
-1.162	3.03377e-06	-1.162	-4.4828e-06	-1.252	1.26541e-06	-1.552	-6.9786e-06
-1.163	3.02777e-06	-1.163	-4.4821e-06	-1.256	1.27741e-06	-1.556	-6.9266e-06
-1.164	3.02277e-06	-1.164	-4.4813e-06	-1.26	1.28841e-06	-1.56	-6.8816e-06
-1.165	3.01777e-06	-1.165	-4.4802e-06	-1.264	1.29941e-06	-1.564	-6.8416e-06
-1.166	3.01277e-06	-1.166	-4.4792e-06	-1.268	1.31241e-06	-1.568	-6.8076e-06
-1.167	3.00677e-06	-1.167	-4.4781e-06	-1.272	1.32641e-06	-1.572	-6.7796e-06
-1.168	3.00177e-06	-1.168	-4.4769e-06	-1.276	1.33941e-06	-1.576	-6.7566e-06
-1.169	2.99677e-06	-1.169	-4.4758e-06	-1.28	1.35341e-06	-1.58	-6.7376e-06
-1.17	2.99177e-06	-1.17	-4.4749e-06	-1.284	1.36741e-06	-1.584	-6.7226e-06
-1.171	2.98677e-06	-1.171	-4.4737e-06	-1.288	1.38041e-06	-1.588	-6.7106e-06
-1.172	2.98177e-06	-1.172	-4.4726e-06	-1.292	1.39141e-06	-1.592	-6.7026e-06
-1.173	2.97677e-06	-1.173	-4.4716e-06	-1.296	1.40041e-06	-1.596	-6.6986e-06
-1.174	2.97177e-06	-1.174	-4.4704e-06	-1.3	1.40841e-06	-1.6	-6.6946e-06
-1.175	2.96677e-06	-1.175	-4.4692e-06	-1.304	1.41141e-06	-1.604	-6.6916e-06
-1.176	2.96077e-06	-1.176	-4.4685e-06	-1.308	1.41041e-06	-1.608	-6.6886e-06
-1.177	2.95477e-06	-1.177	-4.4674e-06	-1.312	1.40541e-06	-1.612	-6.6856e-06
-1.178	2.94977e-06	-1.178	-4.4661e-06	-1.316	1.39341e-06	-1.616	-6.6826e-06
-1.179	2.94477e-06	-1.179	-4.4651e-06	-1.32	1.37541e-06	-1.62	-6.6806e-06
-1.18	2.93977e-06	-1.18	-4.4639e-06	-1.324	1.34741e-06	-1.624	-6.6796e-06
-1.181	2.93377e-06	-1.181	-4.4629e-06	-1.328	1.31141e-06	-1.628	-6.6786e-06
-1.182	2.92877e-06	-1.182	-4.4618e-06	-1.332	1.26441e-06	-1.632	-6.6776e-06
-1.183	2.92277e-06	-1.183	-4.4608e-06	-1.336	1.20541e-06	-1.636	-6.6796e-06
-1.184	2.91777e-06	-1.184	-4.4596e-06	-1.34	1.13341e-06	-1.64	-6.6856e-06
-1.185	2.91177e-06	-1.185	-4.4585e-06	-1.344	1.04841e-06	-1.644	-6.6956e-06
-1.186	2.90577e-06	-1.186	-4.4573e-06	-1.348	9.50407e-07	-1.648	-6.7116e-06
-1.187	2.89977e-06	-1.187	-4.4563e-06	-1.352	8.40407e-07	-1.652	-6.7326e-06
-1.188	2.89477e-06	-1.188	-4.4552e-06	-1.356	7.23407e-07	-1.656	-6.7616e-06
-1.189	2.88877e-06	-1.189	-4.4546e-06	-1.36	6.03407e-07	-1.66	-6.7986e-06
-1.19	2.88177e-06	-1.19	-4.4536e-06	-1.364	4.88407e-07	-1.664	-6.8446e-06
-1.191	2.87577e-06	-1.191	-4.4527e-06	-1.368	3.80707e-07	-1.668	-6.9006e-06
-1.192	2.86977e-06	-1.192	-4.4516e-06	-1.372	2.82707e-07	-1.672	-6.9656e-06
-1.193	2.86377e-06	-1.193	-4.4506e-06	-1.376	1.98507e-07	-1.676	-7.0396e-06
-1.194	2.85777e-06	-1.194	-4.4496e-06	-1.38	1.26407e-07	-1.68	-7.1236e-06
-1.195	2.85177e-06	-1.195	-4.4486e-06	-1.384	6.54069e-08	-1.684	-7.2136e-06
-1.196	2.84577e-06	-1.196	-4.4475e-06	-1.388	1.41069e-08	-1.688	-7.3126e-06
-1.197	2.83877e-06	-1.197	-4.4464e-06	-1.392	-2.88931e-08	-1.692	-7.4176e-06
-1.198	2.83277e-06	-1.198	-4.4456e-06	-1.396	-6.38931e-08	-1.696	-7.5256e-06
-1.199	2.82577e-06	-1.199	-4.4446e-06	-1.4	-9.29931e-08	-1.7	-7.6336e-06
-1.2	2.81977e-06	-1.2	-4.4436e-06	-1.404	-1.16893e-07	-1.704	-7.7406e-06
-1.201	2.81277e-06	-1.201	-4.4428e-06	-1.408	-1.35793e-07	-1.708	-7.8436e-06
-1.202	2.80577e-06	-1.202	-4.4418e-06	-1.412	-1.51593e-07	-1.712	-7.9416e-06
-1.203	2.79977e-06	-1.203	-4.4408e-06	-1.416	-1.64293e-07	-1.716	-8.0338e-06
-1.204	2.79277e-06	-1.204	-4.4397e-06	-1.42	-1.74793e-07	-1.72	-8.1182e-06
-1.205	2.78577e-06	-1.205	-4.4387e-06	-1.424	-1.83893e-07	-1.724	-8.1955e-06
-1.206	2.77977e-06	-1.206	-4.4378e-06	-1.428	-1.89693e-07	-1.728	-8.2653e-06
-1.207	2.77277e-06	-1.207	-4.4367e-06	-1.432	-1.94593e-07	-1.732	-8.328e-06
-1.208	2.76577e-06	-1.208	-4.4361e-06	-1.436	-1.98493e-07	-1.736	-8.3841e-06
-1.209	2.75777e-06	-1.209	-4.4351e-06	-1.44	-2.00593e-07	-1.74	-8.4333e-06
-1.21	2.75077e-06	-1.21	-4.4341e-06	-1.444	-2.01693e-07	-1.744	-8.4762e-06
-1.211	2.74377e-06	-1.211	-4.4332e-06	-1.448	-2.01993e-07	-1.748	-8.5135e-06
-1.212	2.73577e-06	-1.212	-4.4323e-06	-1.452	-2.01493e-07	-1.752	-8.5466e-06
-1.213	2.72877e-06	-1.213	-4.4313e-06	-1.456	-2.00393e-07	-1.756	-8.5758e-06
-1.214	2.72077e-06	-1.214	-4.4307e-06	-1.46	-1.98393e-07	-1.76	-8.6006e-06
-1.215	2.71277e-06	-1.215	-4.4301e-06	-1.464	-1.95993e-07	-1.764	-8.6225e-06
-1.216	2.70477e-06	-1.216	-4.4293e-06	-1.468	-1.93193e-07	-1.768	-8.6413e-06
-1.217	2.69677e-06	-1.217	-4.4284e-06	-1.472	-1.89693e-07	-1.772	-8.6573e-06
-1.218	2.68977e-06	-1.218	-4.4276e-06	-1.476	-1.85793e-07	-1.776	-8.6714e-06
-1.219	2.68177e-06	-1.219	-4.4268e-06	-1.48	-1.81493e-07	-1.78	-8.6839e-06
-1.22	2.67377e-06	-1.22	-4.426e-06	-1.484	-1.77193e-07	-1.784	-8.695e-06
-1.221	2.66577e-06	-1.221	-4.4251e-06	-1.488	-1.72393e-07	-1.788	-8.7043e-06
-1.222	2.65677e-06	-1.222	-4.4243e-06	-1.492	-1.67093e-07	-1.792	-8.7119e-06
-1.223	2.64877e-06	-1.223	-4.4233e-06	-1.496	-1.61593e-07	-1.796	-8.7182e-06
-1.224	2.64077e-06	-1.224	-4.4226e-06	-1.5	-1.56593e-07	-1.8	-8.7234e-06
-1.225	2.63277e-06	-1.225	-4.4218e-06	-1.504	-1.50193e-07	-1.804	-8.7285e-06
-1.226	2.62477e-06	-1.226	-4.421e-06	-1.508	-1.44293e-07	-1.808	-8.7332e-06
-1.227	2.61577e-06	-1.227	-4.4202e-06	-1.512	-1.38193e-07	-1.812	-8.7363e-06
-1.228	2.60777e-06	-1.228	-4.4195e-06	-1.516	-1.31993e-07	-1.816	-8.7391e-06
-1.229	2.59877e-06	-1.229	-4.4187e-06	-1.52	-1.25993e-07	-1.82	-8.7414e-06
-1.23	2.58977e-06	-1.23	-4.4178e-06	-1.524	-1.19593e-07	-1.824	-8.743e-06
-1.231	2.58077e-06	-1.231	-4.4169e-06	-1.528	-1.13593e-07	-1.828	-8.7447e-06
-1.232	2.57277e-06	-1.232	-4.4163e-06	-1.532	-1.07493e-07	-1.832	-8.7464e-06
-1.233	2.56377e-06	-1.233	-4.4155e-06	-1.536	-1.01493e-07	-1.836	-8.7477e-06
-1.234	2.55477e-06	-1.234	-4.4148e-06	-1.54	-9.53931e-08	-1.84	-8.748e-06
-1.235	2.54577e-06	-1.235	-4.4141e-06	-1.544	-8.94931e-08	-1.844	-8.7483e-06
-1.236	2.53677e-06	-1.236	-4.4134e-06	-1.548	-8.39931e-08	-1.848	-8.7487e-06
-1.237	2.52777e-06	-1.237	-4.4126e-06	-1.552	-7.87931e-08	-1.852	-8.7494e-06
-1.238	2.51877e-06	-1.238	-4.4118e-06	-1.556	-7.29931e-08	-1.856	-8.7494e-06
-1.239	2.51077e-06	-1.239	-4.4111e-06	-1.56	-6.79931e-08	-1.86	-8.7491e-06
-1.24	2.50077e-06	-1.24	-4.4106e-06	-1.564	-6.37931e-08	-1.864	-8.7487e-06
-1.241	2.49177e-06	-1.241	-4.41e-06	-1.568	-5.87931e-08	-1.868	-8.7485e-06
-1.242	2.48377e-06	-1.242	-4.4093e-06	-1.572	-5.46931e-08	-1.872	-8.7486e-06
-1.243	2.47477e-06	-1.243	-4.4086e-06	-1.576	-5.06931e-08	-1.876	-8.7485e-06
-1.244	2.46477e-06	-1.244	-4.408e-06	-1.58	-4.69931e-08	-1.88	-8.7481e-06
-1.245	2.45577e-06	-1.245	-4.4073e-06	-1.584	-4.39931e-08	-1.884	-8.748e-06
-1.246	2.44677e-06	-1.246	-4.4069e-06	-1.588	-4.10931e-08	-1.888	-8.747e-06
-1.247	2.43777e-06	-1.247	-4.4063e-06	-1.592	-3.89931e-08	-1.892	-8.7468e-06
-1.248	2.42877e-06	-1.248	-4.4057e-06	-1.596	-3.70931e-08	-1.896	-8.7466e-06
-1.249	2.41977e-06	-1.249	-4.4051e-06	-1.6	-3.54931e-08	-1.9	-8.7464e-06
-1.25	2.41077e-06	-1.25	-4.4045e-06
-1.251	2.40177e-06	-1.251	-4.4039e-06
-1.252	2.39277e-06	-1.252	-4.4034e-06
-1.253	2.38377e-06	-1.253	-4.403e-06
-1.254	2.37477e-06	-1.254	-4.4025e-06
-1.255	2.36577e-06	-1.255	-4.4019e-06
-1.256	2.35677e-06	-1.256	-4.4014e-06
-1.257	2.34777e-06	-1.257	-4.4009e-06
-1.258	2.33777e-06	-1.258	-4.4003e-06
-1.259	2.32877e-06	-1.259	-4.4e-06
-1.26	2.31977e-06	-1.26	-4.3996e-06
-1.261	2.31077e-06	-1.261	-4.399e-06
-1.262	2.30177e-06	-1.262	-4.3987e-06
-1.263	2.29277e-06	-1.263	-4.3982e-06
-1.264	2.28377e-06	-1.264	-4.3977e-06
-1.265	2.27477e-06	-1.265	-4.3974e-06
-1.266	2.26577e-06	-1.266	-4.3973e-06
-1.267	2.25677e-06	-1.267	-4.3969e-06
-1.268	2.24777e-06	-1.268	-4.3963e-06
-1.269	2.23877e-06	-1.269	-4.3959e-06
-1.27	2.22977e-06	-1.27	-4.3955e-06
-1.271	2.22077e-06	-1.271	-4.3952e-06
-1.272	2.21077e-06	-1.272	-4.3951e-06
-1.273	2.20277e-06	-1.273	-4.3948e-06
-1.274	2.19377e-06	-1.274	-4.3943e-06
-1.275	2.18477e-06	-1.275	-4.3939e-06
-1.276	2.17577e-06	-1.276	-4.3935e-06
-1.277	2.16677e-06	-1.277	-4.393e-06
-1.278	2.15777e-06	-1.278	-4.393e-06
-1.279	2.14877e-06	-1.279	-4.3927e-06
-1.28	2.13877e-06	-1.28	-4.3925e-06
-1.281	2.13077e-06	-1.281	-4.392e-06
-1.282	2.12077e-06	-1.282	-4.3918e-06
-1.283	2.11177e-06	-1.283	-4.3915e-06
-1.284	2.10377e-06	-1.284	-4.3912e-06
-1.285	2.09377e-06	-1.285	-4.3911e-06
-1.286	2.08477e-06	-1.286	-4.3907e-06
-1.287	2.07577e-06	-1.287	-4.3904e-06
-1.288	2.06677e-06	-1.288	-4.3904e-06
-1.289	2.05777e-06	-1.289	-4.3901e-06
-1.29	2.04877e-06	-1.29	-4.3899e-06
-1.291	2.03877e-06	-1.291	-4.3899e-06
-1.292	2.02977e-06	-1.292	-4.3899e-06
-1.293	2.01977e-06	-1.293	-4.3895e-06
-1.294	2.01077e-06	-1.294	-4.3894e-06
-1.295	2.00177e-06	-1.295	-4.3892e-06
-1.296	1.99177e-06	-1.296	-4.389e-06
-1.297	1.98177e-06	-1.297	-4.3888e-06
-1.298	1.97177e-06	-1.298	-4.3888e-06
-1.299	1.96177e-06	-1.299	-4.3886e-06
-1.3	1.95277e-06	-1.3	-4.3884e-06
-1.301	1.94277e-06	-1.301	-4.3882e-06
-1.302	1.93277e-06	-1.302	-4.388e-06
-1.303	1.92277e-06	-1.303	-4.3879e-06
-1.304	1.91277e-06	-1.304	-4.388e-06
-1.305	1.90277e-06	-1.305	-4.3878e-06
-1.306	1.89177e-06	-1.306	-4.3877e-06
-1.307	1.88177e-06	-1.307	-4.3877e-06
-1.308	1.87077e-06	-1.308	-4.3875e-06
-1.309	1.86077e-06	-1.309	-4.3873e-06
-1.31	1.84977e-06	-1.31	-4.3874e-06
-1.311	1.83877e-06	-1.311	-4.3871e-06
-1.312	1.82777e-06	-1.312	-4.3871e-06
-1.313	1.81777e-06	-1.313	-4.387e-06
-1.314	1.80577e-06	-1.314	-4.387e-06
-1.315	1.79477e-06	-1.315	-4.3869e-06
-1.316	1.78377e-06	-1.316	-4.3868e-06
-1.317	1.77077e-06	-1.317	-4.3873e-06
-1.318	1.75977e-06	-1.318	-4.3872e-06
-1.319	1.74777e-06	-1.319	-4.387e-06
-1.32	1.73677e-06	-1.32	-4.3869e-06
-1.321	1.72477e-06	-1.321	-4.3869e-06
-1.322	1.71277e-06	-1.322	-4.3868e-06
-1.323	1.70077e-06	-1.323	-4.3869e-06
-1.324	1.68877e-06	-1.324	-4.3869e-06
-1.325	1.67677e-06	-1.325	-4.387e-06
-1.326	1.66477e-06	-1.326	-4.387e-06
-1.327	1.65277e-06	-1.327	-4.3869e-06
-1.328	1.64077e-06	-1.328	-4.3868e-06
-1.329	1.62877e-06	-1.329	-4.3867e-06
-1.33	1.61577e-06	-1.33	-4.3869e-06
-1.331	1.60377e-06	-1.331	-4.387e-06
-1.332	1.59177e-06	-1.332	-4.387e-06
-1.333	1.57877e-06	-1.333	-4.3869e-06
-1.334	1.56677e-06	-1.334	-4.3871e-06
-1.335	1.55377e-06	-1.335	-4.387e-06
-1.336	1.54177e-06	-1.336	-4.3872e-06
-1.337	1.52877e-06	-1.337	-4.3871e-06
-1.338	1.51677e-06	-1.338	-4.3872e-06
-1.339	1.50377e-06	-1.339	-4.3873e-06
-1.34	1.49177e-06	-1.34	-4.3872e-06
-1.341	1.47877e-06	-1.341	-4.3874e-06
-1.342	1.46677e-06	-1.342	-4.3877e-06
-1.343	1.45377e-06	-1.343	-4.388e-06
-1.344	1.44077e-06	-1.344	-4.3881e-06
-1.345	1.42877e-06	-1.345	-4.3882e-06
-1.346	1.41777e-06	-1.346	-4.3882e-06
-1.347	1.40577e-06	-1.347	-4.3885e-06
-1.348	1.39377e-06	-1.348	-4.3884e-06
-1.349	1.38077e-06	-1.349	-4.3886e-06
-1.35	1.36977e-06	-1.35	-4.3888e-06
-1.351	1.35777e-06	-1.351	-4.3889e-06
-1.352	1.34577e-06	-1.352	-4.389e-06
-1.353	1.33477e-06	-1.353	-4.3892e-06
-1.354	1.32377e-06	-1.354	-4.3891e-06
-1.355	1.31177e-06	-1.355	-4.3894e-06
-1.356	1.30077e-06	-1.356	-4.3897e-06
-1.357	1.28977e-06	-1.357	-4.3898e-06
-1.358	1.27877e-06	-1.358	-4.39e-06
-1.359	1.26877e-06	-1.359	-4.3901e-06
-1.36	1.25877e-06	-1.36	-4.3906e-06
-1.361	1.24877e-06	-1.361	-4.3906e-06
-1.362	1.23877e-06	-1.362	-4.3909e-06
-1.363	1.22877e-06	-1.363	-4.3911e-06
-1.364	1.22077e-06	-1.364	-4.3912e-06
-1.365	1.21177e-06	-1.365	-4.3914e-06
-1.366	1.20377e-06	-1.366	-4.3917e-06
-1.367	1.19577e-06	-1.367	-4.3919e-06
-1.368	1.18677e-06	-1.368	-4.3926e-06
-1.369	1.17977e-06	-1.369	-4.3929e-06
-1.37	1.17277e-06	-1.37	-4.3931e-06
-1.371	1.16577e-06	-1.371	-4.3934e-06
-1.372	1.15977e-06	-1.372	-4.3935e-06
-1.373	1.15377e-06	-1.373	-4.3938e-06
-1.374	1.14877e-06	-1.374	-4.3942e-06
-1.375	1.14277e-06	-1.375	-4.3946e-06
-1.376	1.13877e-06	-1.376	-4.3949e-06
-1.377	1.13477e-06	-1.377	-4.3952e-06
-1.378	1.13077e-06	-1.378	-4.3955e-06
-1.379	1.12777e-06	-1.379	-4.3959e-06
-1.38	1.12577e-06	-1.38	-4.3962e-06
-1.381	1.12377e-06	-1.381	-4.3967e-06
-1.382	1.12177e-06	-1.382	-4.397e-06
-1.383	1.12077e-06	-1.383	-4.3972e-06
-1.384	1.12077e-06	-1.384	-4.3978e-06
-1.385	1.12077e-06	-1.385	-4.3981e-06
-1.386	1.12077e-06	-1.386	-4.3985e-06
-1.387	1.12277e-06	-1.387	-4.399e-06
-1.388	1.12377e-06	-1.388	-4.3994e-06
-1.389	1.12577e-06	-1.389	-4.3997e-06
-1.39	1.12977e-06	-1.39	-4.4001e-06
-1.391	1.13277e-06	-1.391	-4.4006e-06
-1.392	1.13677e-06	-1.392	-4.4011e-06
-1.393	1.14177e-06	-1.393	-4.4015e-06
-1.394	1.14577e-06	-1.394	-4.4023e-06
-1.395	1.15177e-06	-1.395	-4.4028e-06
-1.396	1.15777e-06	-1.396	-4.4032e-06
-1.397	1.16377e-06	-1.397	-4.4037e-06
-1.398	1.17177e-06	-1.398	-4.4043e-06
-1.399	1.17877e-06	-1.399	-4.4046e-06
-1.4	1.18677e-06	-1.4	-4.4053e-06
-1.401	1.19577e-06	-1.401	-4.4058e-06
-1.402	1.20477e-06	-1.402	-4.4062e-06
-1.403	1.21377e-06	-1.403	-4.4068e-06
-1.404	1.22277e-06	-1.404	-4.4074e-06
-1.405	1.23277e-06	-1.405	-4.4078e-06
-1.406	1.24277e-06	-1.406	-4.4086e-06
-1.407	1.25277e-06	-1.407	-4.4093e-06
-1.408	1.26377e-06	-1.408	-4.4099e-06
-1.409	1.27477e-06	-1.409	-4.4105e-06
-1.41	1.28577e-06	-1.41	-4.4111e-06
-1.411	1.29777e-06	-1.411	-4.4118e-06
-1.412	1.30877e-06	-1.412	-4.4124e-06
-1.413	1.32077e-06	-1.413	-4.4133e-06
-1.414	1.33177e-06	-1.414	-4.414e-06
-1.415	1.34377e-06	-1.415	-4.4145e-06
-1.416	1.35577e-06	-1.416	-4.4152e-06
-1.417	1.36777e-06	-1.417	-4.416e-06
-1.418	1.37877e-06	-1.418	-4.4166e-06
-1.419	1.39077e-06	-1.419	-4.4177e-06
-1.42	1.40177e-06	-1.42	-4.4188e-06
-1.421	1.41377e-06	-1.421	-4.4194e-06
-1.422	1.42477e-06	-1.422	-4.4203e-06
-1.423	1.43477e-06	-1.423	-4.4212e-06
-1.424	1.44677e-06	-1.424	-4.422e-06
-1.425	1.45777e-06	-1.425	-4.4227e-06
-1.426	1.46877e-06	-1.426	-4.4236e-06
-1.427	1.47977e-06	-1.427	-4.4244e-06
-1.428	1.49077e-06	-1.428	-4.4252e-06
-1.429	1.50177e-06	-1.429	-4.4261e-06
-1.43	1.51277e-06	-1.43	-4.4271e-06
-1.431	1.52277e-06	-1.431	-4.4277e-06
-1.432	1.53277e-06	-1.432	-4.4289e-06
-1.433	1.54377e-06	-1.433	-4.4298e-06
-1.434	1.55377e-06	-1.434	-4.4306e-06
-1.435	1.56377e-06	-1.435	-4.4315e-06
-1.436	1.57277e-06	-1.436	-4.4324e-06
-1.437	1.58277e-06	-1.437	-4.4333e-06
-1.438	1.59277e-06	-1.438	-4.4344e-06
-1.439	1.60177e-06	-1.439	-4.4354e-06
-1.44	1.61077e-06	-1.44	-4.4365e-06
-1.441	1.61977e-06	-1.441	-4.4375e-06
-1.442	1.62877e-06	-1.442	-4.4385e-06
-1.443	1.63777e-06	-1.443	-4.4396e-06
-1.444	1.64577e-06	-1.444	-4.4406e-06
-1.445	1.65377e-06	-1.445	-4.4421e-06
-1.446	1.66277e-06	-1.446	-4.4432e-06
-1.447	1.67077e-06	-1.447	-4.4444e-06
-1.448	1.67877e-06	-1.448	-4.4457e-06
-1.449	1.68677e-06	-1.449	-4.447e-06
-1.45	1.69477e-06	-1.45	-4.4481e-06
-1.451	1.70177e-06	-1.451	-4.4495e-06
-1.452	1.70977e-06	-1.452	-4.4508e-06
-1.453	1.71677e-06	-1.453	-4.4521e-06
-1.454	1.72477e-06	-1.454	-4.4533e-06
-1.455	1.73177e-06	-1.455	-4.4546e-06
-1.456	1.73877e-06	-1.456	-4.4559e-06
-1.457	1.74577e-06	-1.457	-4.4575e-06
-1.458	1.75277e-06	-1.458	-4.459e-06
-1.459	1.75977e-06	-1.459	-4.4605e-06
-1.46	1.76577e-06	-1.46	-4.4619e-06
-1.461	1.77277e-06	-1.461	-4.4635e-06
-1.462	1.77977e-06	-1.462	-4.4652e-06
-1.463	1.78577e-06	-1.463	-4.4668e-06
-1.464	1.79177e-06	-1.464	-4.4686e-06
-1.465	1.79777e-06	-1.465	-4.4704e-06
-1.466	1.80477e-06	-1.466	-4.4721e-06
-1.467	1.81077e-06	-1.467	-4.4739e-06
-1.468	1.81677e-06	-1.468	-4.4755e-06
-1.469	1.82277e-06	-1.469	-4.4773e-06
-1.47	1.82777e-06	-1.47	-4.4793e-06
-1.471	1.83377e-06	-1.471	-4.4814e-06
-1.472	1.83877e-06	-1.472	-4.4833e-06
-1.473	1.84377e-06	-1.473	-4.4854e-06
-1.474	1.84977e-06	-1.474	-4.4876e-06
-1.475	1.85477e-06	-1.475	-4.4898e-06
-1.476	1.85977e-06	-1.476	-4.4919e-06
-1.477	1.86477e-06	-1.477	-4.4942e-06
-1.478	1.86977e-06	-1.478	-4.4964e-06
-1.479	1.87477e-06	-1.479	-4.4986e-06
-1.48	1.87977e-06	-1.48	-4.5011e-06
-1.481	1.88477e-06	-1.481	-4.5036e-06
-1.482	1.88977e-06	-1.482	-4.5059e-06
-1.483	1.89377e-06	-1.483	-4.5087e-06
-1.484	1.89877e-06	-1.484	-4.5114e-06
-1.485	1.90277e-06	-1.485	-4.514e-06
-1.486	1.90777e-06	-1.486	-4.5167e-06
-1.487	1.91177e-06	-1.487	-4.5197e-06
-1.488	1.91577e-06	-1.488	-4.5225e-06
-1.489	1.92077e-06	-1.489	-4.5254e-06
-1.49	1.92477e-06	-1.49	-4.5285e-06
-1.491	1.92877e-06	-1.491	-4.5315e-06
-1.492	1.93277e-06	-1.492	-4.5346e-06
-1.493	1.93677e-06	-1.493	-4.538e-06
-1.494	1.94077e-06	-1.494	-4.5414e-06
-1.495	1.94477e-06	-1.495	-4.5446e-06
-1.496	1.94777e-06	-1.496	-4.5486e-06
-1.497	1.95177e-06	-1.497	-4.5524e-06
-1.498	1.95477e-06	-1.498	-4.556e-06
-1.499	1.95877e-06	-1.499	-4.5601e-06
-1.5	1.96177e-06	-1.5	-4.5642e-06
-1.501	1.96577e-06	-1.501	-4.5682e-06
-1.502	1.96877e-06	-1.502	-4.5725e-06
-1.503	1.97277e-06	-1.503	-4.5768e-06
-1.504	1.97577e-06	-1.504	-4.5811e-06
-1.505	1.97877e-06	-1.505	-4.5855e-06
-1.506	1.98177e-06	-1.506	-4.5901e-06
-1.507	1.98577e-06	-1.507	-4.5949e-06
-1.508	1.98877e-06	-1.508	-4.5998e-06
-1.509	1.99077e-06	-1.509	-4.605e-06
-1.51	1.99377e-06	-1.51	-4.6101e-06
-1.511	1.99677e-06	-1.511	-4.6152e-06
-1.512	1.99977e-06	-1.512	-4.6208e-06
-1.513	2.00277e-06	-1.513	-4.6262e-06
-1.514	2.00577e-06	-1.514	-4.6319e-06
-1.515	2.00777e-06	-1.515	-4.6382e-06
-1.516	2.01077e-06	-1.516	-4.6443e-06
-1.517	2.01277e-06	-1.517	-4.6504e-06
-1.518	2.01577e-06	-1.518	-4.6565e-06
-1.519	2.01777e-06	-1.519	-4.663e-06
-1.52	2.02077e-06	-1.52	-4.6696e-06
-1.521	2.02277e-06	-1.521	-4.6763e-06
-1.522	2.02477e-06	-1.522	-4.6835e-06
-1.523	2.02677e-06	-1.523	-4.6904e-06
-1.524	2.02977e-06	-1.524	-4.6973e-06
-1.525	2.03177e-06	-1.525	-4.7047e-06
-1.526	2.03377e-06	-1.526	-4.7121e-06
-1.527	2.03577e-06	-1.527	-4.7197e-06
-1.528	2.03677e-06	-1.528	-4.7277e-06
-1.529	2.03877e-06	-1.529	-4.7357e-06
-1.53	2.04077e-06	-1.53	-4.7438e-06
-1.531	2.04277e-06	-1.531	-4.752e-06
-1.532	2.04477e-06	-1.532	-4.7602e-06
-1.533	2.04577e-06	-1.533	-4.7688e-06
-1.534	2.04777e-06	-1.534	-4.7777e-06
-1.535	2.04977e-06	-1.535	-4.7868e-06
-1.536	2.05077e-06	-1.536	-4.7962e-06
-1.537	2.05277e-06	-1.537	-4.8054e-06
-1.538	2.05377e-06	-1.538	-4.8148e-06
-1.539	2.05477e-06	-1.539	-4.8242e-06
-1.54	2.05677e-06	-1.54	-4.8336e-06
-1.541	2.05777e-06	-1.541	-4.8434e-06
-1.542	2.05877e-06	-1.542	-4.8536e-06
-1.543	2.05977e-06	-1.543	-4.8636e-06
-1.544	2.06077e-06	-1.544	-4.8746e-06
-1.545	2.06177e-06	-1.545	-4.8856e-06
-1.546	2.06277e-06	-1.546	-4.8966e-06
-1.547	2.06277e-06	-1.547	-4.9076e-06
-1.548	2.06377e-06	-1.548	-4.9186e-06
-1.549	2.06477e-06	-1.549	-4.9306e-06
-1.55	2.06577e-06	-1.55	-4.9416e-06
-1.551	2.06577e-06	-1.551	-4.9536e-06
-1.552	2.06677e-06	-1.552	-4.9656e-06
-1.553	2.06677e-06	-1.553	-4.9776e-06
-1.554	2.06777e-06	-1.554	-4.9896e-06
-1.555	2.06777e-06	-1.555	-5.0026e-06
-1.556	2.06777e-06	-1.556	-5.0146e-06
-1.557	2.06877e-06	-1.557	-5.0266e-06
-1.558	2.06877e-06	-1.558	-5.0396e-06
-1.559	2.06877e-06	-1.559	-5.0516e-06
-1.56	2.06877e-06	-1.56	-5.0656e-06
-1.561	2.06877e-06	-1.561	-5.0786e-06
-1.562	2.06877e-06	-1.562	-5.0916e-06
-1.563	2.06877e-06	-1.563	-5.1056e-06
-1.564	2.06777e-06	-1.564	-5.1196e-06
-1.565	2.06777e-06	-1.565	-5.1336e-06
-1.566	2.06777e-06	-1.566	-5.1476e-06
-1.567	2.06677e-06	-1.567	-5.1616e-06
-1.568	2.06677e-06	-1.568	-5.1756e-06
-1.569	2.06577e-06	-1.569	-5.1896e-06
-1.57	2.06577e-06	-1.57	-5.2046e-06
-1.571	2.06477e-06	-1.571	-5.2186e-06
-1.572	2.06377e-06	-1.572	-5.2326e-06
-1.573	2.06277e-06	-1.573	-5.2486e-06
-1.574	2.06177e-06	-1.574	-5.2636e-06
-1.575	2.06077e-06	-1.575	-5.2776e-06
-1.576	2.05977e-06	-1.576	-5.2926e-06
-1.577	2.05877e-06	-1.577	-5.3076e-06
-1.578	2.05777e-06	-1.578	-5.3236e-06
-1.579	2.05677e-06	-1.579	-5.3386e-06
-1.58	2.05477e-06	-1.58	-5.3546e-06
-1.581	2.05377e-06	-1.581	-5.3696e-06
-1.582	2.05177e-06	-1.582	-5.3856e-06
-1.583	2.05077e-06	-1.583	-5.4006e-06
-1.584	2.04877e-06	-1.584	-5.4166e-06
-1.585	2.04777e-06	-1.585	-5.4316e-06
-1.586	2.04477e-06	-1.586	-5.4476e-06
-1.587	2.04377e-06	-1.587	-5.4636e-06
-1.588	2.04177e-06	-1.588	-5.4796e-06
-1.589	2.03977e-06	-1.589	-5.4956e-06
-1.59	2.03777e-06	-1.59	-5.5116e-06
-1.591	2.03577e-06	-1.591	-5.5266e-06
-1.592	2.03377e-06	-1.592	-5.5426e-06
-1.593	2.03177e-06	-1.593	-5.5586e-06
-1.594	2.02877e-06	-1.594	-5.5736e-06
-1.595	2.02677e-06	-1.595	-5.5896e-06
-1.596	2.02377e-06	-1.596	-5.6056e-06
-1.597	2.02177e-06	-1.597	-5.6206e-06
-1.598	2.01877e-06	-1.598	-5.6366e-06
-1.599	2.01577e-06	-1.599	-5.6526e-06
-1.6	2.01877e-06	-1.6	-5.6686e-06
-1.599	2.04877e-06	-1.601	-5.6836e-06
-1.598	2.07677e-06	-1.602	-5.6996e-06
-1.597	2.09977e-06	-1.603	-5.7146e-06
-1.596	2.12077e-06	-1.604	-5.7296e-06
-1.595	2.13977e-06	-1.605	-5.7456e-06
-1.594	2.15777e-06	-1.606	-5.7606e-06
-1.593	2.17577e-06	-1.607	-5.7756e-06
-1.592	2.19277e-06	-1.608	-5.7916e-06
-1.591	2.20877e-06	-1.609	-5.8066e-06
-1.59	2.22377e-06	-1.61	-5.8206e-06
-1.589	2.23977e-06	-1.611	-5.8356e-06
-1.588	2.25477e-06	-1.612	-5.8506e-06
-1.587	2.26877e-06	-1.613	-5.8656e-06
-1.586	2.28277e-06	-1.614	-5.8796e-06
-1.585	2.29677e-06	-1.615	-5.8946e-06
-1.584	2.30977e-06	-1.616	-5.9086e-06
-1.583	2.32277e-06	-1.617	-5.9236e-06
-1.582	2.33577e-06	-1.618	-5.9376e-06
-1.581	2.34777e-06	-1.619	-5.9516e-06
-1.58	2.36077e-06	-1.62	-5.9656e-06
-1.579	2.37277e-06	-1.621	-5.9786e-06
-1.578	2.38477e-06	-1.622	-5.9926e-06
-1.577	2.39577e-06	-1.623	-6.0056e-06
-1.576	2.40677e-06	-1.624	-6.0206e-06
-1.575	2.41877e-06	-1.625	-6.0346e-06
-1.574	2.42977e-06	-1.626	-6.0476e-06
-1.573	2.44077e-06	-1.627	-6.0606e-06
-1.572	2.45177e-06	-1.628	-6.0736e-06
-1.571	2.46177e-06	-1.629	-6.0866e-06
-1.57	2.47177e-06	-1.63	-6.0986e-06
-1.569	2.48277e-06	-1.631	-6.1116e-06
-1.568	2.49177e-06	-1.632	-6.1246e-06
-1.567	2.50177e-06	-1.633	-6.1366e-06
-1.566	2.51177e-06	-1.634	-6.1496e-06
-1.565	2.52077e-06	-1.635	-6.1626e-06
-1.564	2.53077e-06	-1.636	-6.1746e-06
-1.563	2.53977e-06	-1.637	-6.1856e-06
-1.562	2.54877e-06	-1.638	-6.1976e-06
-1.561	2.55777e-06	-1.639	-6.2096e-06
-1.56	2.56677e-06	-1.64	-6.2216e-06
-1.559	2.57577e-06	-1.641	-6.2336e-06
-1.558	2.58477e-06	-1.642	-6.2456e-06
-1.557	2.59277e-06	-1.643	-6.2576e-06
-1.556	2.60177e-06	-1.644	-6.2686e-06
-1.555	2.60977e-06	-1.645	-6.2806e-06
-1.554	2.61777e-06	-1.646	-6.2906e-06
-1.553	2.62577e-06	-1.647	-6.3016e-06
-1.552	2.63377e-06	-1.648	-6.3126e-06
-1.551	2.64177e-06	-1.649	-6.3236e-06
-1.55	2.64977e-06	-1.65	-6.3346e-06
-1.549	2.65677e-06	-1.651	-6.3456e-06
-1.548	2.66477e-06	-1.652	-6.3566e-06
-1.547	2.67177e-06	-1.653	-6.3676e-06
-1.546	2.67977e-06	-1.654	-6.3776e-06
-1.545	2.68677e-06	-1.655	-6.3876e-06
-1.544	2.69377e-06	-1.656	-6.3976e-06
-1.543	2.70077e-06	-1.657	-6.4076e-06
-1.542	2.70777e-06	-1.658	-6.4176e-06
-1.541	2.71477e-06	-1.659	-6.4286e-06
-1.54	2.72177e-06	-1.66	-6.4396e-06
-1.539	2.72777e-06	-1.661	-6.4496e-06
-1.538	2.73477e-06	-1.662	-6.4596e-06
-1.537	2.74077e-06	-1.663	-6.4696e-06
-1.536	2.74777e-06	-1.664	-6.4786e-06
-1.535	2.75377e-06	-1.665	-6.4886e-06
-1.534	2.76077e-06	-1.666	-6.4976e-06
-1.533	2.76677e-06	-1.667	-6.5076e-06
-1.532	2.77277e-06	-1.668	-6.5176e-06
-1.531	2.77877e-06	-1.669	-6.5276e-06
-1.53	2.78477e-06	-1.67	-6.5376e-06
-1.529	2.78977e-06	-1.671	-6.5466e-06
-1.528	2.79577e-06	-1.672	-6.5556e-06
-1.527	2.80177e-06	-1.673	-6.5636e-06
-1.526	2.80777e-06	-1.674	-6.5726e-06
-1.525	2.81377e-06	-1.675	-6.5816e-06
-1.524	2.81877e-06	-1.676	-6.5906e-06
-1.523	2.82477e-06	-1.677	-6.5996e-06
-1.522	2.82977e-06	-1.678	-6.6086e-06
-1.521	2.83577e-06	-1.679	-6.6166e-06
-1.52	2.84177e-06	-1.68	-6.6256e-06
-1.519	2.84677e-06	-1.681	-6.6326e-06
-1.518	2.85177e-06	-1.682	-6.6406e-06
-1.517	2.85677e-06	-1.683	-6.6486e-06
-1.516	2.86277e-06	-1.684	-6.6556e-06
-1.515	2.86777e-06	-1.685	-6.6636e-06
-1.514	2.87277e-06	-1.686	-6.6716e-06
-1.513	2.87777e-06	-1.687	-6.6796e-06
-1.512	2.88277e-06	-1.688	-6.6866e-06
-1.511	2.88777e-06	-1.689	-6.6936e-06
-1.51	2.89277e-06	-1.69	-6.6996e-06
-1.509	2.89777e-06	-1.691	-6.7056e-06
-1.508	2.90277e-06	-1.692	-6.7116e-06
-1.507	2.90677e-06	-1.693	-6.7176e-06
-1.506	2.91177e-06	-1.694	-6.7236e-06
-1.505	2.91677e-06	-1.695	-6.7296e-06
-1.504	2.92177e-06	-1.696	-6.7356e-06
-1.503	2.92577e-06	-1.697	-6.7406e-06
-1.502	2.93077e-06	-1.698	-6.7446e-06
-1.501	2.93577e-06	-1.699	-6.7486e-06
-1.5	2.93977e-06	-1.7	-6.7526e-06
-1.499	2.94477e-06	-1.701	-6.7566e-06
-1.498	2.94877e-06	-1.702	-6.7606e-06
-1.497	2.95277e-06	-1.703	-6.7646e-06
-1.496	2.95777e-06	-1.704	-6.7686e-06
-1.495	2.96277e-06	-1.705	-6.7716e-06
-1.494	2.96677e-06	-1.706	-6.7736e-06
-1.493	2.97177e-06	-1.707	-6.7756e-06
-1.492	2.97577e-06	-1.708	-6.7766e-06
-1.491	2.97977e-06	-1.709	-6.7786e-06
-1.49	2.98377e-06	-1.71	-6.7796e-06
-1.489	2.98877e-06	-1.711	-6.7806e-06
-1.488	2.99277e-06	-1.712	-6.7816e-06
-1.487	2.99577e-06	-1.713	-6.7816e-06
-1.486	2.99977e-06	-1.714	-6.7816e-06
-1.485	3.00377e-06	-1.715	-6.7816e-06
-1.484	3.00877e-06	-1.716	-6.7796e-06
-1.483	3.01277e-06	-1.717	-6.7786e-06
-1.482	3.01677e-06	-1.718	-6.7766e-06
-1.481	3.02077e-06	-1.719	-6.7746e-06
-1.48	3.02477e-06	-1.72	-6.7726e-06
-1.479	3.02877e-06	-1.721	-6.7706e-06
-1.478	3.03277e-06	-1.722	-6.7686e-06
-1.477	3.03677e-06	-1.723	-6.7646e-06
-1.476	3.04077e-06	-1.724	-6.7616e-06
-1.475	3.04477e-06	-1.725	-6.7566e-06
-1.474	3.04877e-06	-1.726	-6.7526e-06
-1.473	3.05277e-06	-1.727	-6.7486e-06
-1.472	3.05677e-06	-1.728	-6.7446e-06
-1.471	3.06077e-06	-1.729	-6.7396e-06
-1.47	3.06477e-06	-1.73	-6.7346e-06
-1.469	3.06877e-06	-1.731	-6.7296e-06
-1.468	3.07277e-06	-1.732	-6.7226e-06
-1.467	3.07677e-06	-1.733	-6.7166e-06
-1.466	3.08077e-06	-1.734	-6.7106e-06
-1.465	3.08377e-06	-1.735	-6.7036e-06
-1.464	3.08877e-06	-1.736	-6.6966e-06
-1.463	3.09177e-06	-1.737	-6.6896e-06
-1.462	3.09577e-06	-1.738	-6.6826e-06
-1.461	3.09977e-06	-1.739	-6.6756e-06
-1.46	3.10377e-06	-1.74	-6.6686e-06
-1.459	3.10777e-06	-1.741	-6.6606e-06
-1.458	3.11077e-06	-1.742	-6.6526e-06
-1.457	3.11477e-06	-1.743	-6.6436e-06
-1.456	3.11877e-06	-1.744	-6.6356e-06
-1.455	3.12277e-06	-1.745	-6.6276e-06
-1.454	3.12577e-06	-1.746	-6.6196e-06
-1.453	3.12977e-06	-1.747	-6.6116e-06
-1.452	3.13377e-06	-1.748	-6.6026e-06
-1.451	3.13777e-06	-1.749	-6.5936e-06
-1.45	3.14177e-06	-1.75	-6.5856e-06
-1.449	3.14477e-06	-1.751	-6.5766e-06
-1.448	3.14877e-06	-1.752	-6.5686e-06
-1.447	3.15277e-06	-1.753	-6.5606e-06
-1.446	3.15677e-06	-1.754	-6.5516e-06
-1.445	3.16077e-06	-1.755	-6.5426e-06
-1.444	3.16477e-06	-1.756	-6.5346e-06
-1.443	3.16827e-06	-1.757	-6.5246e-06
-1.442	3.17197e-06	-1.758	-6.5156e-06
-1.441	3.17557e-06	-1.759	-6.5076e-06
-1.44	3.17927e-06	-1.76	-6.4986e-06
-1.439	3.18297e-06	-1.761	-6.4896e-06
-1.438	3.18667e-06	-1.762	-6.4806e-06
-1.437	3.19047e-06	-1.763	-6.4726e-06
-1.436	3.19417e-06	-1.764	-6.4636e-06
-1.435	3.19807e-06	-1.765	-6.4556e-06
-1.434	3.20177e-06	-1.766	-6.4466e-06
-1.433	3.20567e-06	-1.767	-6.4376e-06
-1.432	3.20967e-06	-1.768	-6.4296e-06
-1.431	3.21367e-06	-1.769	-6.4206e-06
-1.43	3.21737e-06	-1.77	-6.4126e-06
-1.429	3.22127e-06	-1.771	-6.4046e-06
-1.428	3.22517e-06	-1.772	-6.3966e-06
-1.427	3.22907e-06	-1.773	-6.3886e-06
-1.426	3.23297e-06	-1.774	-6.3816e-06
-1.425	3.23707e-06	-1.775	-6.3716e-06
-1.424	3.24097e-06	-1.776	-6.3626e-06
-1.423	3.24497e-06	-1.777	-6.3556e-06
-1.422	3.24897e-06	-1.778	-6.3486e-06
-1.421	3.25297e-06	-1.779	-6.3416e-06
-1.42	3.25707e-06	-1.78	-6.3336e-06
-1.419	3.26177e-06	-1.781	-6.3266e-06
-1.418	3.26577e-06	-1.782	-6.3196e-06
-1.417	3.26967e-06	-1.783	-6.3126e-06
-1.416	3.27387e-06	-1.784	-6.3046e-06
-1.415	3.27787e-06	-1.785	-6.2976e-06
-1.414	3.28217e-06	-1.786	-6.2906e-06
-1.413	3.28647e-06	-1.787	-6.2836e-06
-1.412	3.29077e-06	-1.788	-6.2776e-06
-1.411	3.29507e-06	-1.789	-6.2706e-06
-1.41	3.29917e-06	-1.79	-6.2646e-06
-1.409	3.30347e-06	-1.791	-6.2576e-06
-1.408	3.30797e-06	-1.792	-6.2506e-06
-1.407	3.31227e-06	-1.793	-6.2446e-06
-1.406	3.31687e-06	-1.794	-6.2376e-06
-1.405	3.32127e-06	-1.795	-6.2316e-06
-1.404	3.32567e-06	-1.796	-6.2256e-06
-1.403	3.33007e-06	-1.797	-6.2196e-06
-1.402	3.33487e-06	-1.798	-6.2136e-06
-1.401	3.33937e-06	-1.799	-6.2076e-06
-1.4	3.34427e-06	-1.8	-6.2016e-06
-1.399	3.34927e-06	-1.801	-6.1956e-06
-1.398	3.35407e-06	-1.802	-6.1896e-06
-1.397	3.35907e-06	-1.803	-6.1836e-06
-1.396	3.36397e-06	-1.804	-6.1786e-06
-1.395	3.36897e-06	-1.805	-6.1736e-06
-1.394	3.37467e-06	-1.806	-6.1676e-06
-1.393	3.38027e-06	-1.807	-6.1626e-06
-1.392	3.38557e-06	-1.808	-6.1576e-06
-1.391	3.39087e-06	-1.809	-6.1526e-06
-1.39	3.39647e-06	-1.81	-6.1466e-06
-1.389	3.40187e-06	-1.811	-6.1416e-06
-1.388	3.40737e-06	-1.812	-6.1366e-06
-1.387	3.41327e-06	-1.813	-6.1316e-06
-1.386	3.41907e-06	-1.814	-6.1266e-06
-1.385	3.42507e-06	-1.815	-6.1226e-06
-1.384	3.43097e-06	-1.816	-6.1176e-06
-1.383	3.43717e-06	-1.817	-6.1136e-06
-1.382	3.44327e-06	-1.818	-6.1086e-06
-1.381	3.44997e-06	-1.819	-6.1046e-06
-1.38	3.45657e-06	-1.82	-6.0996e-06
-1.379	3.46327e-06	-1.821	-6.0946e-06
-1.378	3.46997e-06	-1.822	-6.0906e-06
-1.377	3.47697e-06	-1.823	-6.0866e-06
-1.376	3.48367e-06	-1.824	-6.0826e-06
-1.375	3.49077e-06	-1.825	-6.0786e-06
-1.374	3.49847e-06	-1.826	-6.0736e-06
-1.373	3.50607e-06	-1.827	-6.0696e-06
-1.372	3.51377e-06	-1.828	-6.0656e-06
-1.371	3.52197e-06	-1.829	-6.0616e-06
-1.37	3.52997e-06	-1.83	-6.0576e-06
-1.369	3.53827e-06	-1.831	-6.0536e-06
-1.368	3.54767e-06	-1.832	-6.0506e-06
-1.367	3.55617e-06	-1.833	-6.0476e-06
-1.366	3.56507e-06	-1.834	-6.0436e-06
-1.365	3.57407e-06	-1.835	-6.0396e-06
-1.364	3.58307e-06	-1.836	-6.0356e-06
-1.363	3.59257e-06	-1.837	-6.0316e-06
-1.362	3.60257e-06	-1.838	-6.0286e-06
-1.361	3.61227e-06	-1.839	-6.0246e-06
-1.36	3.62257e-06	-1.84	-6.0216e-06
-1.359	3.63287e-06	-1.841	-6.0186e-06
-1.358	3.64357e-06	-1.842	-6.0156e-06
-1.357	3.65457e-06	-1.843	-6.0116e-06
-1.356	3.66557e-06	-1.844	-6.0086e-06
-1.355	3.67727e-06	-1.845	-6.0056e-06
-1.354	3.68867e-06	-1.846	-6.0026e-06
-1.353	3.70047e-06	-1.847	-5.9986e-06
-1.352	3.71247e-06	-1.848	-5.9956e-06
-1.351	3.72487e-06	-1.849	-5.9936e-06
-1.35	3.73727e-06	-1.85	-5.9896e-06
-1.349	3.75057e-06	-1.851	-5.9876e-06
-1.348	3.76357e-06	-1.852	-5.9846e-06
-1.347	3.77677e-06	-1.853	-5.9816e-06
-1.346	3.78997e-06	-1.854	-5.9786e-06
-1.345	3.80367e-06	-1.855	-5.9756e-06
-1.344	3.81787e-06	-1.856	-5.9736e-06
-1.343	3.83217e-06	-1.857	-5.9706e-06
-1.342	3.84697e-06	-1.858	-5.9676e-06
-1.341	3.86147e-06	-1.859	-5.9656e-06
-1.34	3.87617e-06	-1.86	-5.9626e-06
-1.339	3.89117e-06	-1.861	-5.9606e-06
-1.338	3.90667e-06	-1.862	-5.9576e-06
-1.337	3.92187e-06	-1.863	-5.9546e-06
-1.336	3.93767e-06	-1.864	-5.9526e-06
-1.335	3.95377e-06	-1.865	-5.9496e-06
-1.334	3.96937e-06	-1.866	-5.9476e-06
-1.333	3.98557e-06	-1.867	-5.9456e-06
-1.332	4.00207e-06	-1.868	-5.9436e-06
-1.331	4.01847e-06	-1.869	-5.9406e-06
-1.33	4.03547e-06	-1.87	-5.9386e-06
-1.329	4.05257e-06	-1.871	-5.9366e-06
-1.328	4.06963e-06	-1.872	-5.9346e-06
-1.327	4.08684e-06	-1.873	-5.9316e-06
-1.326	4.10426e-06	-1.874	-5.9296e-06
-1.325	4.1219e-06	-1.875	-5.9276e-06
-1.324	4.13937e-06	-1.876	-5.9256e-06
-1.323	4.15739e-06	-1.877	-5.9236e-06
-1.322	4.17589e-06	-1.878	-5.9216e-06
-1.321	4.19369e-06	-1.879	-5.9196e-06
-1.32	4.21206e-06	-1.88	-5.9176e-06
-1.319	4.23018e-06	-1.881	-5.9156e-06
-1.318	4.24847e-06	-1.882	-5.9146e-06
-1.317	4.26747e-06	-1.883	-5.9126e-06
-1.316	4.28617e-06	-1.884	-5.9106e-06
-1.315	4.30467e-06	-1.885	-5.9086e-06
-1.314	4.32317e-06	-1.886	-5.9076e-06
-1.313	4.34167e-06	-1.887	-5.9056e-06
-1.312	4.36007e-06	-1.888	-5.9036e-06
-1.311	4.37847e-06	-1.889	-5.9026e-06
-1.31	4.39727e-06	-1.89	-5.9006e-06
-1.309	4.41627e-06	-1.891	-5.8986e-06
-1.308	4.43467e-06	-1.892	-5.8976e-06
-1.307	4.45327e-06	-1.893	-5.8956e-06
-1.306	4.47197e-06	-1.894	-5.8946e-06
-1.305	4.49057e-06	-1.895	-5.8926e-06
-1.304	4.50947e-06	-1.896	-5.8916e-06
-1.303	4.52787e-06	-1.897	-5.8906e-06
-1.302	4.54627e-06	-1.898	-5.8886e-06
-1.301	4.56467e-06	-1.899	-5.8876e-06
-1.3	4.58177e-06	-1.9	-5.8786e-06
-1.299	4.59997e-06	-1.899	-5.8446e-06
-1.298	4.61827e-06	-1.898	-5.8236e-06
-1.297	4.63657e-06	-1.897	-5.8086e-06
-1.296	4.65477e-06	-1.896	-5.7966e-06
-1.295	4.67267e-06	-1.895	-5.7846e-06
-1.294	4.69047e-06	-1.894	-5.7726e-06
-1.293	4.70817e-06	-1.893	-5.7616e-06
-1.292	4.72587e-06	-1.892	-5.7516e-06
-1.291	4.74397e-06	-1.891	-5.7416e-06
-1.29	4.76087e-06	-1.89	-5.7316e-06
-1.289	4.77767e-06	-1.889	-5.7216e-06
-1.288	4.79487e-06	-1.888	-5.7126e-06
-1.287	4.81187e-06	-1.887	-5.7036e-06
-1.286	4.82837e-06	-1.886	-5.6946e-06
-1.285	4.84497e-06	-1.885	-5.6856e-06
-1.284	4.86147e-06	-1.884	-5.6766e-06
-1.283	4.87757e-06	-1.883	-5.6686e-06
-1.282	4.89367e-06	-1.882	-5.6596e-06
-1.281	4.90947e-06	-1.881	-5.6516e-06
-1.28	4.92507e-06	-1.88	-5.6436e-06
-1.279	4.94057e-06	-1.879	-5.6356e-06
-1.278	4.95657e-06	-1.878	-5.6276e-06
-1.277	4.97167e-06	-1.877	-5.6206e-06
-1.276	4.98647e-06	-1.876	-5.6126e-06
-1.275	5.00077e-06	-1.875	-5.6056e-06
-1.274	5.01487e-06	-1.874	-5.5986e-06
-1.273	5.02907e-06	-1.873	-5.5906e-06
-1.272	5.04277e-06	-1.872	-5.5836e-06
-1.271	5.05627e-06	-1.871	-5.5766e-06
-1.27	5.06937e-06	-1.87	-5.5696e-06
-1.269	5.08247e-06	-1.869	-5.5626e-06
-1.268	5.09527e-06	-1.868	-5.5556e-06
-1.267	5.10777e-06	-1.867	-5.5486e-06
-1.266	5.12027e-06	-1.866	-5.5416e-06
-1.265	5.13267e-06	-1.865	-5.5356e-06
-1.264	5.14427e-06	-1.864	-5.5286e-06
-1.263	5.15537e-06	-1.863	-5.5226e-06
-1.262	5.16677e-06	-1.862	-5.5156e-06
-1.261	5.17677e-06	-1.861	-5.5096e-06
-1.26	5.18777e-06	-1.86	-5.5036e-06
-1.259	5.19777e-06	-1.859	-5.4976e-06
-1.258	5.20877e-06	-1.858	-5.4906e-06
-1.257	5.21777e-06	-1.857	-5.4846e-06
-1.256	5.22777e-06	-1.856	-5.4786e-06
-1.255	5.23677e-06	-1.855	-5.4726e-06
-1.254	5.24577e-06	-1.854	-5.4656e-06
-1.253	5.25477e-06	-1.853	-5.4606e-06
-1.252	5.26377e-06	-1.852	-5.4546e-06
-1.251	5.27177e-06	-1.851	-5.4486e-06
-1.25	5.27977e-06	-1.85	-5.4426e-06
-1.249	5.28777e-06	-1.849	-5.4366e-06
-1.248	5.29477e-06	-1.848	-5.4306e-06
-1.247	5.30177e-06	-1.847	-5.4246e-06
-1.246	5.30877e-06	-1.846	-5.4196e-06
-1.245	5.31577e-06	-1.845	-5.4136e-06
-1.244	5.32277e-06	-1.844	-5.4076e-06
-1.243	5.32877e-06	-1.843	-5.4026e-06
-1.242	5.33477e-06	-1.842	-5.3966e-06
-1.241	5.34077e-06	-1.841	-5.3916e-06
-1.24	5.34677e-06	-1.84	-5.3866e-06
-1.239	5.35177e-06	-1.839	-5.3806e-06
-1.238	5.35677e-06	-1.838	-5.3756e-06
-1.237	5.36177e-06	-1.837	-5.3706e-06
-1.236	5.36677e-06	-1.836	-5.3646e-06
-1.235	5.37177e-06	-1.835	-5.3596e-06
-1.234	5.37577e-06	-1.834	-5.3546e-06
-1.233	5.38077e-06	-1.833	-5.3496e-06
-1.232	5.38477e-06	-1.832	-5.3446e-06
-1.231	5.38877e-06	-1.831	-5.3396e-06
-1.23	5.39177e-06	-1.83	-5.3346e-06
-1.229	5.39577e-06	-1.829	-5.3286e-06
-1.228	5.39877e-06	-1.828	-5.3236e-06
-1.227	5.40277e-06	-1.827	-5.3186e-06
-1.226	5.40577e-06	-1.826	-5.3136e-06
-1.225	5.40877e-06	-1.825	-5.3086e-06
-1.224	5.41177e-06	-1.824	-5.3036e-06
-1.223	5.41477e-06	-1.823	-5.2986e-06
-1.222	5.41777e-06	-1.822	-5.2936e-06
-1.221	5.42077e-06	-1.821	-5.2886e-06
-1.22	5.42377e-06	-1.82	-5.2846e-06
-1.219	5.42577e-06	-1.819	-5.2796e-06
-1.218	5.42777e-06	-1.818	-5.2746e-06
-1.217	5.43077e-06	-1.817	-5.2696e-06
-1.216	5.43277e-06	-1.816	-5.2646e-06
-1.215	5.43477e-06	-1.815	-5.2606e-06
-1.214	5.43777e-06	-1.814	-5.2556e-06
-1.213	5.43977e-06	-1.813	-5.2506e-06
-1.212	5.44177e-06	-1.812	-5.2456e-06
-1.211	5.44277e-06	-1.811	-5.2416e-06
-1.21	5.44477e-06	-1.81	-5.2366e-06
-1.209	5.44677e-06	-1.809	-5.2316e-06
-1.208	5.44777e-06	-1.808	-5.2276e-06
-1.207	5.44977e-06	-1.807	-5.2226e-06
-1.206	5.45077e-06	-1.806	-5.2186e-06
-1.205	5.45277e-06	-1.805	-5.2136e-06
-1.204	5.45377e-06	-1.804	-5.2096e-06
-1.203	5.45477e-06	-1.803	-5.2046e-06
-1.202	5.45677e-06	-1.802	-5.1996e-06
-1.201	5.45777e-06	-1.801	-5.1946e-06
-1.2	5.45877e-06	-1.8	-5.1906e-06
-1.199	5.45977e-06	-1.799	-5.1856e-06
-1.198	5.46077e-06	-1.798	-5.1816e-06
-1.197	5.46177e-06	-1.797	-5.1766e-06
-1.196	5.46277e-06	-1.796	-5.1716e-06
-1.195	5.46277e-06	-1.795	-5.1666e-06
-1.194	5.46377e-06	-1.794	-5.1626e-06
-1.193	5.46477e-06	-1.793	-5.1576e-06
-1.192	5.46477e-06	-1.792	-5.1536e-06
-1.191	5.46577e-06	-1.791	-5.1486e-06
-1.19	5.46577e-06	-1.79	-5.1436e-06
-1.189	5.46677e-06	-1.789	-5.1396e-06
-1.188	5.46677e-06	-1.788	-5.1346e-06
-1.187	5.46677e-06	-1.787	-5.1296e-06
-1.186	5.46777e-06	-1.786	-5.1246e-06
-1.185	5.46677e-06	-1.785	-5.1196e-06
-1.184	5.46677e-06	-1.784	-5.1146e-06
-1.183	5.46677e-06	-1.783	-5.1106e-06
-1.182	5.46677e-06	-1.782	-5.1056e-06
-1.181	5.46677e-06	-1.781	-5.1006e-06
-1.18	5.46577e-06	-1.78	-5.0956e-06
-1.179	5.46577e-06	-1.779	-5.0906e-06
-1.178	5.46477e-06	-1.778	-5.0856e-06
-1.177	5.46477e-06	-1.777	-5.0806e-06
-1.176	5.46377e-06	-1.776	-5.0756e-06
-1.175	5.46277e-06	-1.775	-5.0706e-06
-1.174	5.46177e-06	-1.774	-5.0656e-06
-1.173	5.46077e-06	-1.773	-5.0606e-06
-1.172	5.45977e-06	-1.772	-5.0556e-06
-1.171	5.45877e-06	-1.771	-5.0506e-06
-1.17	5.45777e-06	-1.77	-5.0456e-06
-1.169	5.45677e-06	-1.769	-5.0406e-06
-1.168	5.45577e-06	-1.768	-5.0346e-06
-1.167	5.45377e-06	-1.767	-5.0296e-06
-1.166	5.45277e-06	-1.766	-5.0236e-06
-1.165	5.45077e-06	-1.765	-5.0186e-06
-1.164	5.44977e-06	-1.764	-5.0136e-06
-1.163	5.44777e-06	-1.763	-5.0086e-06
-1.162	5.44677e-06	-1.762	-5.0026e-06
-1.161	5.44477e-06	-1.761	-4.9976e-06
-1.16	5.44277e-06	-1.76	-4.9916e-06
-1.159	5.44077e-06	-1.759	-4.9856e-06
-1.158	5.43877e-06	-1.758	-4.9796e-06
-1.157	5.43677e-06	-1.757	-4.9736e-06
-1.156	5.43477e-06	-1.756	-4.9676e-06
-1.155	5.43277e-06	-1.755	-4.9616e-06
-1.154	5.43077e-06	-1.754	-4.9556e-06
-1.153	5.42877e-06	-1.753	-4.9496e-06
-1.152	5.42677e-06	-1.752	-4.9436e-06
-1.151	5.42477e-06	-1.751	-4.9366e-06
-1.15	5.42377e-06	-1.75	-4.9306e-06
-1.149	5.42177e-06	-1.749	-4.9236e-06
-1.148	5.41877e-06	-1.748	-4.9166e-06
-1.147	5.41777e-06	-1.747	-4.9106e-06
-1.146	5.41577e-06	-1.746	-4.9036e-06
-1.145	5.41377e-06	-1.745	-4.8966e-06
-1.144	5.41177e-06	-1.744	-4.8896e-06
-1.143	5.40977e-06	-1.743	-4.8826e-06
-1.142	5.40777e-06	-1.742	-4.8756e-06
-1.141	5.40577e-06	-1.741	-4.8676e-06
-1.14	5.40377e-06	-1.74	-4.8606e-06
-1.139	5.40277e-06	-1.739	-4.8526e-06
-1.138	5.40077e-06	-1.738	-4.8446e-06
-1.137	5.39977e-06	-1.737	-4.8375e-06
-1.136	5.39777e-06	-1.736	-4.83e-06
-1.135	5.39677e-06	-1.735	-4.8222e-06
-1.134	5.39477e-06	-1.734	-4.8142e-06
-1.133	5.39377e-06	-1.733	-4.8058e-06
-1.132	5.39177e-06	-1.732	-4.7971e-06
-1.131	5.39077e-06	-1.731	-4.7886e-06
-1.13	5.38977e-06	-1.73	-4.7799e-06
-1.129	5.38777e-06	-1.729	-4.7711e-06
-1.128	5.38677e-06	-1.728	-4.7625e-06
-1.127	5.38577e-06	-1.727	-4.7535e-06
-1.126	5.38477e-06	-1.726	-4.7438e-06
-1.125	5.38377e-06	-1.725	-4.7345e-06
-1.124	5.38277e-06	-1.724	-4.725e-06
-1.123	5.38177e-06	-1.723	-4.7153e-06
-1.122	5.38177e-06	-1.722	-4.7055e-06
-1.121	5.38077e-06	-1.721	-4.6957e-06
-1.12	5.37977e-06	-1.72	-4.6856e-06
-1.119	5.37877e-06	-1.719	-4.6758e-06
-1.118	5.37877e-06	-1.718	-4.6657e-06
-1.117	5.37777e-06	-1.717	-4.6551e-06
-1.116	5.37677e-06	-1.716	-4.6444e-06
-1.115	5.37677e-06	-1.715	-4.6331e-06
-1.114	5.37677e-06	-1.714	-4.6217e-06
-1.113	5.37577e-06	-1.713	-4.6104e-06
-1.112	5.37577e-06	-1.712	-4.5993e-06
-1.111	5.37577e-06	-1.711	-4.5879e-06
-1.11	5.37477e-06	-1.71	-4.5766e-06
-1.109	5.37477e-06	-1.709	-4.5652e-06
-1.108	5.37377e-06	-1.708	-4.5533e-06
-1.107	5.37377e-06	-1.707	-4.5412e-06
-1.106	5.37377e-06	-1.706	-4.529e-06
-1.105	5.37277e-06	-1.705	-4.517e-06
-1.104	5.37277e-06	-1.704	-4.5046e-06
-1.103	5.37277e-06	-1.703	-4.4918e-06
-1.102	5.37277e-06	-1.702	-4.4792e-06
-1.101	5.37177e-06	-1.701	-4.4662e-06
-1.1	5.37177e-06	-1.7	-4.453e-06
-1.099	5.37177e-06	-1.699	-4.44e-06
-1.098	5.37177e-06	-1.698	-4.427e-06
-1.097	5.37077e-06	-1.697	-4.4135e-06
-1.096	5.37077e-06	-1.696	-4.4002e-06
-1.095	5.36977e-06	-1.695	-4.3865e-06
-1.094	5.36977e-06	-1.694	-4.3728e-06
-1.093	5.36977e-06	-1.693	-4.3587e-06
-1.092	5.36877e-06	-1.692	-4.3451e-06
-1.091	5.36877e-06	-1.691	-4.3309e-06
-1.09	5.36777e-06	-1.69	-4.3165e-06
-1.089	5.36777e-06	-1.689	-4.3023e-06
-1.088	5.36677e-06	-1.688	-4.2875e-06
-1.087	5.36677e-06	-1.687	-4.2724e-06
-1.086	5.36577e-06	-1.686	-4.2576e-06
-1.085	5.36577e-06	-1.685	-4.2429e-06
-1.084	5.36477e-06	-1.684	-4.2283e-06
-1.083	5.36377e-06	-1.683	-4.2134e-06
-1.082	5.36277e-06	-1.682	-4.1983e-06
-1.081	5.36177e-06	-1.681	-4.1828e-06
-1.08	5.36077e-06	-1.68	-4.1675e-06
-1.079	5.35977e-06	-1.679	-4.152e-06
-1.078	5.35877e-06	-1.678	-4.1366e-06
-1.077	5.35777e-06	-1.677	-4.121e-06
-1.076	5.35577e-06	-1.676	-4.1053e-06
-1.075	5.35477e-06	-1.675	-4.0892e-06
-1.074	5.35377e-06	-1.674	-4.0735e-06
-1.073	5.35177e-06	-1.673	-4.058e-06
-1.072	5.35077e-06	-1.672	-4.0422e-06
-1.071	5.34877e-06	-1.671	-4.0266e-06
-1.07	5.34677e-06	-1.67	-4.0109e-06
-1.069	5.34477e-06	-1.669	-3.9949e-06
-1.068	5.34277e-06	-1.668	-3.9788e-06
-1.067	5.34077e-06	-1.667	-3.963e-06
-1.066	5.33877e-06	-1.666	-3.94713e-06
-1.065	5.33677e-06	-1.665	-3.93105e-06
-1.064	5.33477e-06	-1.664	-3.91494e-06
-1.063	5.33177e-06	-1.663	-3.89887e-06
-1.062	5.32977e-06	-1.662	-3.88259e-06
-1.061	5.32777e-06	-1.661	-3.86656e-06
-1.06	5.32477e-06	-1.66	-3.85081e-06
-1.059	5.32177e-06	-1.659	-3.83452e-06
-1.058	5.31877e-06	-1.658	-3.81855e-06
-1.057	5.31577e-06	-1.657	-3.80284e-06
-1.056	5.31277e-06	-1.656	-3.78678e-06
-1.055	5.30977e-06	-1.655	-3.77066e-06
-1.054	5.30677e-06	-1.654	-3.75499e-06
-1.053	5.30277e-06	-1.653	-3.7389e-06
-1.052	5.29977e-06	-1.652	-3.7232e-06
-1.051	5.29577e-06	-1.651	-3.7075e-06
-1.05	5.29277e-06	-1.65	-3.6917e-06
-1.049	5.28877e-06	-1.649	-3.6759e-06
-1.048	5.28477e-06	-1.648	-3.6605e-06
-1.047	5.28177e-06	-1.647	-3.6457e-06
-1.046	5.27677e-06	-1.646	-3.6305e-06
-1.045	5.27377e-06	-1.645	-3.6152e-06
-1.044	5.26877e-06	-1.644	-3.5998e-06
-1.043	5.26477e-06	-1.643	-3.5846e-06
-1.042	5.26077e-06	-1.642	-3.5693e-06
-1.041	5.25677e-06	-1.641	-3.5548e-06
-1.04	5.25177e-06	-1.64	-3.5401e-06
-1.039	5.24777e-06	-1.639	-3.5256e-06
-1.038	5.24277e-06	-1.638	-3.5108e-06
-1.037	5.23877e-06	-1.637	-3.4959e-06
-1.036	5.23377e-06	-1.636	-3.4816e-06
-1.035	5.22977e-06	-1.635	-3.4672e-06
-1.034	5.22477e-06	-1.634	-3.4529e-06
-1.033	5.21977e-06	-1.633	-3.4396e-06
-1.032	5.21577e-06	-1.632	-3.4262e-06
-1.031	5.21077e-06	-1.631	-3.4127e-06
-1.03	5.20577e-06	-1.63	-3.3987e-06
-1.029	5.20077e-06	-1.629	-3.385e-06
-1.028	5.19577e-06	-1.628	-3.3713e-06
-1.027	5.19077e-06	-1.627	-3.3576e-06
-1.026	5.18577e-06	-1.626	-3.3439e-06
-1.025	5.18077e-06	-1.625	-3.3306e-06
-1.024	5.17577e-06	-1.624	-3.3171e-06
-1.023	5.17077e-06	-1.623	-3.304e-06
-1.022	5.16577e-06	-1.622	-3.2915e-06
-1.021	5.16107e-06	-1.621	-3.2784e-06
-1.02	5.15597e-06	-1.62	-3.2659e-06
-1.019	5.15097e-06	-1.619	-3.2533e-06
-1.018	5.14597e-06	-1.618	-3.2408e-06
-1.017	5.14097e-06	-1.617	-3.2281e-06
-1.016	5.13607e-06	-1.616	-3.2157e-06
-1.015	5.13097e-06	-1.615	-3.2034e-06
-1.014	5.12587e-06	-1.614	-3.1915e-06
-1.013	5.12077e-06	-1.613	-3.1794e-06
-1.012	5.11567e-06	-1.612	-3.1675e-06
-1.011	5.11077e-06	-1.611	-3.1552e-06
-1.01	5.10597e-06	-1.61	-3.143e-06
-1.009	5.10127e-06	-1.609	-3.1311e-06
-1.008	5.09607e-06	-1.608	-3.1191e-06
-1.007	5.09117e-06	-1.607	-3.1074e-06
-1.006	5.08617e-06	-1.606	-3.096e-06
-1.005	5.08127e-06	-1.605	-3.0843e-06
-1.004	5.07637e-06	-1.604	-3.0724e-06
-1.003	5.07177e-06	-1.603	-3.0606e-06
-1.002	5.06697e-06	-1.602	-3.0485e-06
-1.001	5.06197e-06	-1.601	-3.0371e-06
-1	5.05737e-06	-1.6	-3.0253e-06
-0.999	5.05257e-06	-1.599	-3.0137e-06
-0.998	5.04787e-06	-1.598	-3.0019e-06
-0.997	5.04337e-06	-1.597	-2.9907e-06
-0.996	5.03897e-06	-1.596	-2.9797e-06
-0.995	5.03447e-06	-1.595	-2.9686e-06
-0.994	5.02997e-06	-1.594	-2.9578e-06
-0.993	5.02537e-06	-1.593	-2.9467e-06
-0.992	5.02087e-06	-1.592	-2.9352e-06
-0.991	5.01657e-06	-1.591	-2.9238e-06
-0.99	5.01227e-06	-1.59	-2.9128e-06
-0.989	5.00777e-06	-1.589	-2.9018e-06
-0.988	5.00347e-06	-1.588	-2.891e-06
-0.987	4.99917e-06	-1.587	-2.8802e-06
-0.986	4.99497e-06	-1.586	-2.8693e-06
-0.985	4.99067e-06	-1.585	-2.8586e-06
-0.984	4.98697e-06	-1.584	-2.8478e-06
-0.983	4.98287e-06	-1.583	-2.8376e-06
-0.982	4.97847e-06	-1.582	-2.8266e-06
-0.981	4.97457e-06	-1.581	-2.8156e-06
-0.98	4.97057e-06	-1.58	-2.8056e-06
-0.979	4.96637e-06	-1.579	-2.7956e-06
-0.978	4.96267e-06	-1.578	-2.7846e-06
-0.977	4.95877e-06	-1.577	-2.7746e-06
-0.976	4.95477e-06	-1.576	-2.7646e-06
-0.975	4.95067e-06	-1.575	-2.7546e-06
-0.974	4.94667e-06	-1.574	-2.7446e-06
-0.973	4.94267e-06	-1.573	-2.7336e-06
-0.972	4.93897e-06	-1.572	-2.7236e-06
-0.971	4.93547e-06	-1.571	-2.7146e-06
-0.97	4.93187e-06	-1.57	-2.7046e-06
-0.969	4.92807e-06	-1.569	-2.6956e-06
-0.968	4.92447e-06	-1.568	-2.6866e-06
-0.967	4.92077e-06	-1.567	-2.6776e-06
-0.966	4.91727e-06	-1.566	-2.6686e-06
-0.965	4.91397e-06	-1.565	-2.6596e-06
-0.964	4.91067e-06	-1.564	-2.6516e-06
-0.963	4.90707e-06	-1.563	-2.6426e-06
-0.962	4.90377e-06	-1.562	-2.6346e-06
-0.961	4.90047e-06	-1.561	-2.6276e-06
-0.96	4.89717e-06	-1.56	-2.6196e-06
-0.959	4.89397e-06	-1.559	-2.6116e-06
-0.958	4.89107e-06	-1.558	-2.6046e-06
-0.957	4.88797e-06	-1.557	-2.5976e-06
-0.956	4.88467e-06	-1.556	-2.5906e-06
-0.955	4.88157e-06	-1.555	-2.5836e-06
-0.954	4.87837e-06	-1.554	-2.5776e-06
-0.953	4.87517e-06	-1.553	-2.5716e-06
-0.952	4.87237e-06	-1.552	-2.5656e-06
-0.951	4.86937e-06	-1.551	-2.5606e-06
-0.95	4.86617e-06	-1.55	-2.5556e-06
-0.949	4.86347e-06	-1.549	-2.5506e-06
-0.948	4.86047e-06	-1.548	-2.5456e-06
-0.947	4.85767e-06	-1.547	-2.5406e-06
-0.946	4.85477e-06	-1.546	-2.5366e-06
-0.945	4.85207e-06	-1.545	-2.5336e-06
-0.944	4.84927e-06	-1.544	-2.5296e-06
-0.943	4.84637e-06	-1.543	-2.5276e-06
-0.942	4.84367e-06	-1.542	-2.5246e-06
-0.941	4.84087e-06	-1.541	-2.5226e-06
-0.94	4.83827e-06	-1.54	-2.5206e-06
-0.939	4.83567e-06	-1.539	-2.5186e-06
-0.938	4.83297e-06	-1.538	-2.5166e-06
-0.937	4.83037e-06	-1.537	-2.5156e-06
-0.936	4.82787e-06	-1.536	-2.5156e-06
-0.935	4.82527e-06	-1.535	-2.5156e-06
-0.934	4.82257e-06	-1.534	-2.5156e-06
-0.933	4.82037e-06	-1.533	-2.5166e-06
-0.932	4.81797e-06	-1.532	-2.5176e-06
-0.931	4.81557e-06	-1.531	-2.5186e-06
-0.93	4.81317e-06	-1.53	-2.5196e-06
-0.929	4.81077e-06	-1.529	-2.5216e-06
-0.928	4.80827e-06	-1.528	-2.5236e-06
-0.927	4.80597e-06	-1.527	-2.5266e-06
-0.926	4.80357e-06	-1.526	-2.5296e-06
-0.925	4.80117e-06	-1.525	-2.5336e-06
-0.924	4.79877e-06	-1.524	-2.5366e-06
-0.923	4.79637e-06	-1.523	-2.5406e-06
-0.922	4.79417e-06	-1.522	-2.5446e-06
-0.921	4.79187e-06	-1.521	-2.5486e-06
-0.92	4.78987e-06	-1.52	-2.5526e-06
-0.919	4.78757e-06	-1.519	-2.5586e-06
-0.918	4.78527e-06	-1.518	-2.5636e-06
-0.917	4.78317e-06	-1.517	-2.5696e-06
-0.916	4.78097e-06	-1.516	-2.5756e-06
-0.915	4.77877e-06	-1.515	-2.5816e-06
-0.914	4.77657e-06	-1.514	-2.5876e-06
-0.913	4.77457e-06	-1.513	-2.5946e-06
-0.912	4.77257e-06	-1.512	-2.6016e-06
-0.911	4.77047e-06	-1.511	-2.6076e-06
-0.91	4.76837e-06	-1.51	-2.6146e-06
-0.909	4.76637e-06	-1.509	-2.6226e-06
-0.908	4.76437e-06	-1.508	-2.6296e-06
-0.907	4.76287e-06	-1.507	-2.6376e-06
-0.906	4.76067e-06	-1.506	-2.6456e-06
-0.905	4.75867e-06	-1.505	-2.6526e-06
-0.904	4.75697e-06	-1.504	-2.6606e-06
-0.903	4.75507e-06	-1.503	-2.6686e-06
-0.902	4.75307e-06	-1.502	-2.6766e-06
-0.901	4.75127e-06	-1.501	-2.6846e-06
-0.9	4.74937e-06	-1.5	-2.6926e-06
-0.899	4.74757e-06	-1.499	-2.7016e-06
-0.898	4.74567e-06	-1.498	-2.7096e-06
-0.897	4.74387e-06	-1.497	-2.7176e-06
-0.896	4.74207e-06	-1.496	-2.7256e-06
-0.895	4.74027e-06	-1.495	-2.7336e-06
-0.894	4.73867e-06	-1.494	-2.7426e-06
-0.893	4.73677e-06	-1.493	-2.7506e-06
-0.892	4.73487e-06	-1.492	-2.7586e-06
-0.891	4.73317e-06	-1.491	-2.7676e-06
-0.89	4.73147e-06	-1.49	-2.7756e-06
-0.889	4.72967e-06	-1.489	-2.7836e-06
-0.888	4.72807e-06	-1.488	-2.7916e-06
-0.887	4.72617e-06	-1.487	-2.7996e-06
-0.886	4.72437e-06	-1.486	-2.8076e-06
-0.885	4.72287e-06	-1.485	-2.8156e-06
-0.884	4.72107e-06	-1.484	-2.8236e-06
-0.883	4.71937e-06	-1.483	-2.8316e-06
-0.882	4.71787e-06	-1.482	-2.8396e-06
-0.881	4.71637e-06	-1.481	-2.8466e-06
-0.88	4.71477e-06	-1.48	-2.8546e-06
-0.879	4.71317e-06	-1.479	-2.8622e-06
-0.878	4.71157e-06	-1.478	-2.8696e-06
-0.877	4.70997e-06	-1.477	-2.8768e-06
-0.876	4.70837e-06	-1.476	-2.884e-06
-0.875	4.70687e-06	-1.475	-2.8913e-06
-0.874	4.70527e-06	-1.474	-2.8985e-06
-0.873	4.70357e-06	-1.473	-2.9057e-06
-0.872	4.70217e-06	-1.472	-2.9127e-06
-0.871	4.70067e-06	-1.471	-2.9195e-06
-0.87	4.69907e-06	-1.47	-2.926e-06
-0.869	4.69767e-06	-1.469	-2.933e-06
-0.868	4.69617e-06	-1.468	-2.9397e-06
-0.867	4.69457e-06	-1.467	-2.9461e-06
-0.866	4.69317e-06	-1.466	-2.9525e-06
-0.865	4.69157e-06	-1.465	-2.959e-06
-0.864	4.69027e-06	-1.464	-2.9651e-06
-0.863	4.68877e-06	-1.463	-2.9712e-06
-0.862	4.68737e-06	-1.462	-2.9774e-06
-0.861	4.68607e-06	-1.461	-2.9834e-06
-0.86	4.68457e-06	-1.46	-2.9894e-06
-0.859	4.68317e-06	-1.459	-2.9952e-06
-0.858	4.68187e-06	-1.458	-3.0008e-06
-0.857	4.68047e-06	-1.457	-3.0065e-06
-0.856	4.67937e-06	-1.456	-3.0122e-06
-0.855	4.67787e-06	-1.455	-3.0179e-06
-0.854	4.67637e-06	-1.454	-3.0233e-06
-0.853	4.67497e-06	-1.453	-3.0288e-06
-0.852	4.67377e-06	-1.452	-3.0342e-06
-0.851	4.67237e-06	-1.451	-3.0393e-06
-0.85	4.67107e-06	-1.45	-3.0443e-06
-0.849	4.66977e-06	-1.449	-3.0494e-06
-0.848	4.66837e-06	-1.448	-3.0544e-06
-0.847	4.66707e-06	-1.447	-3.0595e-06
-0.846	4.66577e-06	-1.446	-3.0649e-06
-0.845	4.66447e-06	-1.445	-3.0696e-06
-0.844	4.66317e-06	-1.444	-3.0742e-06
-0.843	4.66197e-06	-1.443	-3.079e-06
-0.842	4.66067e-06	-1.442	-3.0836e-06
-0.841	4.65927e-06	-1.441	-3.0883e-06
-0.84	4.65817e-06	-1.44	-3.0927e-06
-0.839	4.65687e-06	-1.439	-3.0968e-06
-0.838	4.65557e-06	-1.438	-3.101e-06
-0.837	4.65447e-06	-1.437	-3.1055e-06
-0.836	4.65317e-06	-1.436	-3.1098e-06
-0.835	4.65197e-06	-1.435	-3.114e-06
-0.834	4.65057e-06	-1.434	-3.118e-06
-0.833	4.64937e-06	-1.433	-3.122e-06
-0.832	4.64817e-06	-1.432	-3.1257e-06
-0.831	4.64707e-06	-1.431	-3.1296e-06
-0.83	4.64617e-06	-1.43	-3.1335e-06
-0.829	4.64487e-06	-1.429	-3.1373e-06
-0.828	4.64367e-06	-1.428	-3.1411e-06
-0.827	4.64257e-06	-1.427	-3.1449e-06
-0.826	4.64137e-06	-1.426	-3.1484e-06
-0.825	4.64007e-06	-1.425	-3.1519e-06
-0.824	4.63917e-06	-1.424	-3.1554e-06
-0.823	4.63787e-06	-1.423	-3.1588e-06
-0.822	4.63677e-06	-1.422	-3.1621e-06
-0.821	4.63567e-06	-1.421	-3.1654e-06
-0.82	4.63457e-06	-1.42	-3.1688e-06
-0.819	4.63347e-06	-1.419	-3.1716e-06
-0.818	4.63247e-06	-1.418	-3.1749e-06
-0.817	4.63147e-06	-1.417	-3.1784e-06
-0.816	4.63017e-06	-1.416	-3.1814e-06
-0.815	4.62917e-06	-1.415	-3.1845e-06
-0.814	4.62807e-06	-1.414	-3.1877e-06
-0.813	4.62707e-06	-1.413	-3.1905e-06
-0.812	4.62597e-06	-1.412	-3.1933e-06
-0.811	4.62487e-06	-1.411	-3.1964e-06
-0.81	4.62387e-06	-1.41	-3.1992e-06
-0.809	4.62267e-06	-1.409	-3.2023e-06
-0.808	4.62157e-06	-1.408	-3.2051e-06
-0.807	4.62067e-06	-1.407	-3.2079e-06
-0.806	4.61947e-06	-1.406	-3.2106e-06
-0.805	4.61897e-06	-1.405	-3.2133e-06
-0.804	4.61797e-06	-1.404	-3.2159e-06
-0.803	4.61677e-06	-1.403	-3.2186e-06
-0.802	4.61587e-06	-1.402	-3.2213e-06
-0.801	4.61487e-06	-1.401	-3.224e-06
-0.8	4.61387e-06	-1.4	-3.2263e-06
-0.799	4.61287e-06	-1.399	-3.2289e-06
-0.798	4.61187e-06	-1.398	-3.2315e-06
-0.797	4.61087e-06	-1.397	-3.2339e-06
-0.796	4.60987e-06	-1.396	-3.2362e-06
-0.795	4.60907e-06	-1.395	-3.2386e-06
-0.794	4.60797e-06	-1.394	-3.2407e-06
-0.793	4.60697e-06	-1.393	-3.243e-06
-0.792	4.60627e-06	-1.392	-3.2454e-06
-0.791	4.60527e-06	-1.391	-3.2477e-06
-0.79	4.60407e-06	-1.39	-3.2498e-06
-0.789	4.60337e-06	-1.389	-3.252e-06
-0.788	4.60237e-06	-1.388	-3.254e-06
-0.787	4.60127e-06	-1.387	-3.2558e-06
-0.786	4.60037e-06	-1.386	-3.258e-06
-0.785	4.59947e-06	-1.385	-3.2602e-06
-0.784	4.59857e-06	-1.384	-3.2622e-06
-0.783	4.59767e-06	-1.383	-3.2644e-06
-0.782	4.59687e-06	-1.382	-3.2667e-06
-0.781	4.59587e-06	-1.381	-3.2685e-06
-0.78	4.59497e-06	-1.38	-3.2703e-06
-0.779	4.59447e-06	-1.379	-3.2723e-06
-0.778	4.59367e-06	-1.378	-3.2741e-06
-0.777	4.59247e-06	-1.377	-3.2761e-06
-0.776	4.59187e-06	-1.376	-3.278e-06
-0.775	4.59087e-06	-1.375	-3.2799e-06
-0.774	4.58987e-06	-1.374	-3.2819e-06
-0.773	4.58907e-06	-1.373	-3.2837e-06
-0.772	4.58837e-06	-1.372	-3.2856e-06
-0.771	4.58737e-06	-1.371	-3.2873e-06
-0.77	4.58667e-06	-1.37	-3.289e-06
-0.769	4.58577e-06	-1.369	-3.2906e-06
-0.768	4.58507e-06	-1.368	-3.2919e-06
-0.767	4.58417e-06	-1.367	-3.2937e-06
-0.766	4.58347e-06	-1.366	-3.2956e-06
-0.765	4.58257e-06	-1.365	-3.2973e-06
-0.764	4.58177e-06	-1.364	-3.299e-06
-0.763	4.58097e-06	-1.363	-3.3007e-06
-0.762	4.58027e-06	-1.362	-3.3021e-06
-0.761	4.57927e-06	-1.361	-3.3036e-06
-0.76	4.57867e-06	-1.36	-3.3053e-06
-0.759	4.57777e-06	-1.359	-3.3069e-06
-0.758	4.57687e-06	-1.358	-3.3085e-06
-0.757	4.57617e-06	-1.357	-3.3101e-06
-0.756	4.57537e-06	-1.356	-3.3116e-06
-0.755	4.57457e-06	-1.355	-3.3129e-06
-0.754	4.57427e-06	-1.354	-3.3145e-06
-0.753	4.57367e-06	-1.353	-3.3161e-06
-0.752	4.57277e-06	-1.352	-3.3174e-06
-0.751	4.57217e-06	-1.351	-3.3188e-06
-0.75	4.57147e-06	-1.35	-3.3203e-06
-0.749	4.57077e-06	-1.349	-3.3216e-06
-0.748	4.57007e-06	-1.348	-3.3231e-06
-0.747	4.56947e-06	-1.347	-3.3244e-06
-0.746	4.56877e-06	-1.346	-3.3258e-06
-0.745	4.56797e-06	-1.345	-3.3271e-06
-0.744	4.56747e-06	-1.344	-3.3283e-06
-0.743	4.56687e-06	-1.343	-3.3295e-06
-0.742	4.56617e-06	-1.342	-3.3305e-06
-0.741	4.56567e-06	-1.341	-3.3318e-06
-0.74	4.56497e-06	-1.34	-3.3332e-06
-0.739	4.56427e-06	-1.339	-3.3345e-06
-0.738	4.56357e-06	-1.338	-3.3359e-06
-0.737	4.56277e-06	-1.337	-3.3373e-06
-0.736	4.56217e-06	-1.336	-3.3384e-06
-0.735	4.56157e-06	-1.335	-3.3396e-06
-0.734	4.56087e-06	-1.334	-3.3409e-06
-0.733	4.56007e-06	-1.333	-3.342e-06
-0.732	4.55947e-06	-1.332	-3.3432e-06
-0.731	4.55887e-06	-1.331	-3.3444e-06
-0.73	4.55817e-06	-1.33	-3.3455e-06
-0.729	4.55737e-06	-1.329	-3.3466e-06
-0.728	4.55717e-06	-1.328	-3.3478e-06
-0.727	4.55657e-06	-1.327	-3.349e-06
-0.726	4.55557e-06	-1.326	-3.3501e-06
-0.725	4.55497e-06	-1.325	-3.3512e-06
-0.724	4.55427e-06	-1.324	-3.3523e-06
-0.723	4.55357e-06	-1.323	-3.3531e-06
-0.722	4.55297e-06	-1.322	-3.3542e-06
-0.721	4.55227e-06	-1.321	-3.3555e-06
-0.72	4.55167e-06	-1.32	-3.3566e-06
-0.719	4.55097e-06	-1.319	-3.3576e-06
-0.718	4.55037e-06	-1.318	-3.3587e-06
-0.717	4.54977e-06	-1.317	-3.3594e-06
-0.716	4.54897e-06	-1.316	-3.3602e-06
-0.715	4.54867e-06	-1.315	-3.3615e-06
-0.714	4.54797e-06	-1.314	-3.3624e-06
-0.713	4.54707e-06	-1.313	-3.3635e-06
-0.712	4.54667e-06	-1.312	-3.3645e-06
-0.711	4.54607e-06	-1.311	-3.3654e-06
-0.71	4.54557e-06	-1.31	-3.3665e-06
-0.709	4.54497e-06	-1.309	-3.3674e-06
-0.708	4.54437e-06	-1.308	-3.3683e-06
-0.707	4.54377e-06	-1.307	-3.3693e-06
-0.706	4.54317e-06	-1.306	-3.3701e-06
-0.705	4.54257e-06	-1.305	-3.3711e-06
-0.704	4.54207e-06	-1.304	-3.372e-06
-0.703	4.54157e-06	-1.303	-3.3729e-06
-0.702	4.54127e-06	-1.302	-3.3739e-06
-0.701	4.54057e-06	-1.301	-3.3747e-06
-0.7	4.53987e-06	-1.3	-3.3755e-06
-0.699	4.53927e-06	-1.299	-3.3763e-06
-0.698	4.53877e-06	-1.298	-3.3771e-06
-0.697	4.53797e-06	-1.297	-3.3778e-06
-0.696	4.53767e-06	-1.296	-3.3788e-06
-0.695	4.53707e-06	-1.295	-3.3797e-06
-0.694	4.53637e-06	-1.294	-3.3806e-06
-0.693	4.53577e-06	-1.293	-3.3815e-06
-0.692	4.53527e-06	-1.292	-3.3822e-06
-0.691	4.53477e-06	-1.291	-3.3826e-06
-0.69	4.53427e-06	-1.29	-3.3835e-06
-0.689	4.53367e-06	-1.289	-3.3843e-06
-0.688	4.53307e-06	-1.288	-3.385e-06
-0.687	4.53267e-06	-1.287	-3.3858e-06
-0.686	4.53197e-06	-1.286	-3.3868e-06
-0.685	4.53147e-06	-1.285	-3.3876e-06
-0.684	4.53097e-06	-1.284	-3.3883e-06
-0.683	4.53057e-06	-1.283	-3.3892e-06
-0.682	4.52997e-06	-1.282	-3.3899e-06
-0.681	4.52927e-06	-1.281	-3.3906e-06
-0.68	4.52877e-06	-1.28	-3.3912e-06
-0.679	4.52837e-06	-1.279	-3.392e-06
-0.678	4.52777e-06	-1.278	-3.3926e-06
-0.677	4.52767e-06	-1.277	-3.3934e-06
-0.676	4.52717e-06	-1.276	-3.3944e-06
-0.675	4.52657e-06	-1.275	-3.3952e-06
-0.674	4.52607e-06	-1.274	-3.3958e-06
-0.673	4.52557e-06	-1.273	-3.3963e-06
-0.672	4.52497e-06	-1.272	-3.3969e-06
-0.671	4.52457e-06	-1.271	-3.3975e-06
-0.67	4.52407e-06	-1.27	-3.3982e-06
-0.669	4.52367e-06	-1.269	-3.3988e-06
-0.668	4.52317e-06	-1.268	-3.3996e-06
-0.667	4.52277e-06	-1.267	-3.4003e-06
-0.666	4.52227e-06	-1.266	-3.4007e-06
-0.665	4.52177e-06	-1.265	-3.4012e-06
-0.664	4.52157e-06	-1.264	-3.402e-06
-0.663	4.52107e-06	-1.263	-3.4025e-06
-0.662	4.52047e-06	-1.262	-3.4031e-06
-0.661	4.51997e-06	-1.261	-3.4038e-06
-0.66	4.51947e-06	-1.26	-3.4044e-06
-0.659	4.51907e-06	-1.259	-3.4051e-06
-0.658	4.51877e-06	-1.258	-3.4058e-06
-0.657	4.51827e-06	-1.257	-3.4065e-06
-0.656	4.51777e-06	-1.256	-3.4071e-06
-0.655	4.51747e-06	-1.255	-3.4075e-06
-0.654	4.51707e-06	-1.254	-3.4082e-06
-0.653	4.51657e-06	-1.253	-3.4085e-06
-0.652	4.51617e-06	-1.252	-3.4091e-06
-0.651	4.51607e-06	-1.251	-3.41e-06
-0.65	4.51557e-06	-1.25	-3.4105e-06
-0.649	4.51507e-06	-1.249	-3.4113e-06
-0.648	4.51477e-06	-1.248	-3.4118e-06
-0.647	4.51437e-06	-1.247	-3.4122e-06
-0.646	4.51387e-06	-1.246	-3.4127e-06
-0.645	4.51347e-06	-1.245	-3.4132e-06
-0.644	4.51307e-06	-1.244	-3.4138e-06
-0.643	4.51257e-06	-1.243	-3.4144e-06
-0.642	4.51207e-06	-1.242	-3.4149e-06
-0.641	4.51167e-06	-1.241	-3.4156e-06
-0.64	4.51127e-06	-1.24	-3.4157e-06
-0.639	4.51087e-06	-1.239	-3.4164e-06
-0.638	4.51067e-06	-1.238	-3.4169e-06
-0.637	4.51027e-06	-1.237	-3.4173e-06
-0.636	4.50967e-06	-1.236	-3.4178e-06
-0.635	4.50937e-06	-1.235	-3.4184e-06
-0.634	4.50897e-06	-1.234	-3.4187e-06
-0.633	4.50857e-06	-1.233	-3.4193e-06
-0.632	4.50817e-06	-1.232	-3.42e-06
-0.631	4.50787e-06	-1.231	-3.4204e-06
-0.63	4.50737e-06	-1.23	-3.421e-06
-0.629	4.50707e-06	-1.229	-3.4213e-06
-0.628	4.50677e-06	-1.228	-3.4217e-06
-0.627	4.50637e-06	-1.227	-3.422e-06
-0.626	4.50627e-06	-1.226	-3.4226e-06
-0.625	4.50597e-06	-1.225	-3.4232e-06
-0.624	4.50557e-06	-1.224	-3.4236e-06
-0.623	4.50527e-06	-1.223	-3.4241e-06
-0.622	4.50487e-06	-1.222	-3.4246e-06
-0.621	4.50447e-06	-1.221	-3.4248e-06
-0.62	4.50407e-06	-1.22	-3.4252e-06
-0.619	4.50397e-06	-1.219	-3.4256e-06
-0.618	4.50357e-06	-1.218	-3.4259e-06
-0.617	4.50307e-06	-1.217	-3.4265e-06
-0.616	4.50277e-06	-1.216	-3.427e-06
-0.615	4.50247e-06	-1.215	-3.4274e-06
-0.614	4.50197e-06	-1.214	-3.4275e-06
-0.613	4.50187e-06	-1.213	-3.428e-06
-0.612	4.50167e-06	-1.212	-3.4285e-06
-0.611	4.50107e-06	-1.211	-3.4288e-06
-0.61	4.50077e-06	-1.21	-3.4291e-06
-0.609	4.50037e-06	-1.209	-3.4298e-06
-0.608	4.50017e-06	-1.208	-3.4299e-06
-0.607	4.49987e-06	-1.207	-3.4304e-06
-0.606	4.49967e-06	-1.206	-3.4311e-06
-0.605	4.49927e-06	-1.205	-3.4314e-06
-0.604	4.49897e-06	-1.204	-3.4317e-06
-0.603	4.49867e-06	-1.203	-3.4322e-06
[truncated: 3,218 more rows]

## Sheet: Fig4d
compoud	HOMO	LUMO
QDI	-5.2	-3.82
5	-5.18	-3.5
9	-4.98	-3.17
